# Supplementary material for: Regio- and enantioselective formation of tetrazole-bearing quaternary stereocenters via palladium-catalyzed allylic amination
Source: Royal Society of Chemistry journal article supplement (doi:10.1039/d1qo01648b), 2021-12-01
Supplement: d1qo01648b1.pdf [file d1qo01648b1.pdf]

## Regio- and enantioselective formation of tetrazole-bearing quaternary stereocenters *via* palladium-catalyzed allylic amination

Shahid Khan, Yu Wang, Mei-Na Zhang, Shahida Perveen, Junjie Zhang and Ajmal Khan\*

*Department of Chemistry, School of Chemistry, and Xi'an Key Laboratory of Sustainable Energy Materials  
Chemistry and MOE Key Laboratory for Nonequilibrium Synthesis and Modulation of Condensed Matter, Xi'an  
Jiaotong University, Xi'an 710049, P. R. China  
E-mail: ajmalkhan@xjtu.edu.cn*

### Table of Contents

|                                                                                                               |         |
|---------------------------------------------------------------------------------------------------------------|---------|
| General experimental details .....                                                                            | S2      |
| Details for the optimization conditions.....                                                                  | S3-S4   |
| General procedure for the allylic amination of vinyl cyclic carbonates <b>1</b> with tetrazole <b>2</b> ..... | S5      |
| Characterization of products <b>3</b> .....                                                                   | S5-S20  |
| Scaled up procedures and X-ray crystallography of compound <b>3ad</b> .....                                   | S20-S22 |
| References .....                                                                                              | S22     |
| NMR charts.....                                                                                               | S23-S54 |
| HPLC charts .....                                                                                             | S55-S84 |

## General experimental details

Analytical thin-layer chromatography (TLC) was carried out using 0.2 mm commercial silica gel plates (Yantai Jiangyou Silica Gel Development Co., Ltd., silica gel HSGF 254). Preparative column chromatography employing silica gel (Qingdao Shenghai Fine Silica Gel Chemical Co., Ltd., 200-300 mesh) was performed according to the method of Still. Solvents for the chromatography are listed as volume/volume ratios. High-resolution mass spectra (HRMS) were performed at Instrumental Analysis Center of Xi'an Jiao Tong University using ESI method. Proton nuclear magnetic resonance ( $^1\text{H}$  NMR) spectra were recorded with a Varian Mercuryplus 400 (400 MHz) spectrometer. Chemical shifts are reported in delta ( $\delta$ ) units, parts per million (ppm) downfield from tetramethylsilane or ppm relative to the center of the singlet at 7.26 ppm for deuteriochloroform. Coupling constants are reported in Hertz (Hz). Carbon-13 nuclear magnetic resonance ( $^{13}\text{C}$  NMR) spectra were recorded with a Varian Gemini 400 (100 MHz) spectrometer. Chemical shifts are reported in delta ( $\delta$ ) units, ppm relative to the center of the triplet at 77.0 ppm for deuteriochloroform.  $^{13}\text{C}$  NMR spectra were routinely run with broadband decoupling. High performance liquid chromatography (HPLC) was performed with FuLi (instruments) spectrometers using chiral column as noted for each compound. Optical rotations were measured on SGW<sup>®</sup>-1 polarimeter.  $\text{Pd}_2(\text{dba})_3 \cdot \text{CHCl}_3$ , Ligands and tetrazole compounds were purchased from Energy Chemicals and used as received. Substituted vinyl cyclic carbonates were synthesized according to the previously reported procedure.<sup>1</sup> All other chemicals were used as received from commercial resources.

## Details for the Optimization Conditions

**Table S1.** Evaluation of ligand for asymmetric Pd-catalyzed amination of allylic cyclic carbonate **1a** with Phenyl tetrazole **2a**<sup>[a]</sup>

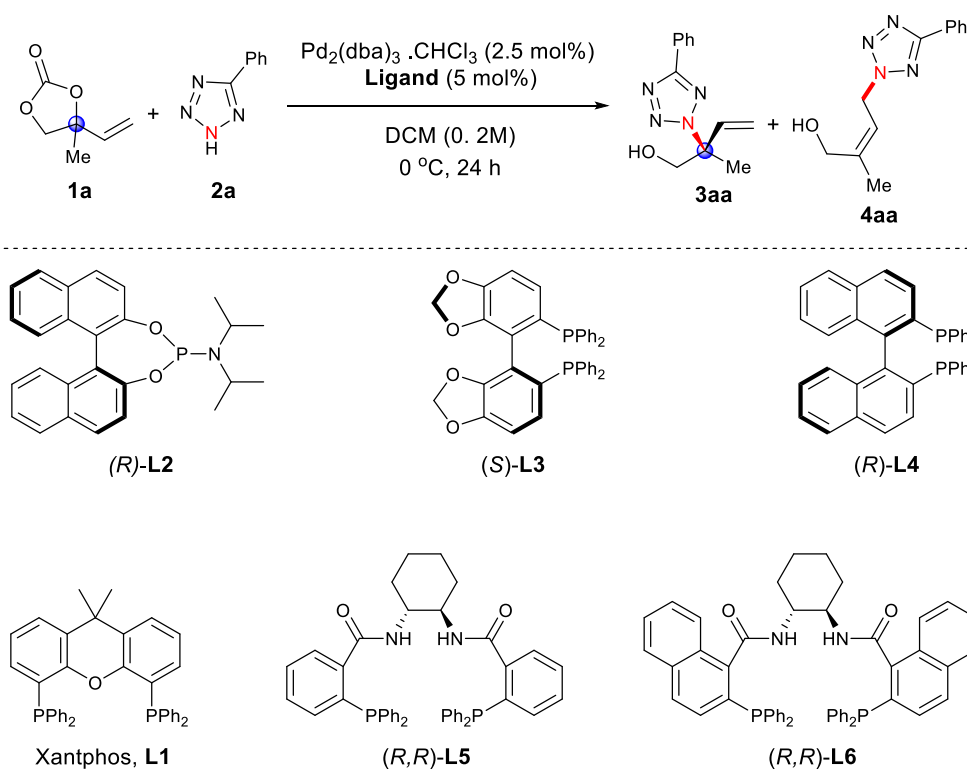

| entry | ligand          | yield (%) <sup>[b]</sup> | <i>b/l</i> <sup>[c]</sup> | ee (%) <sup>[d]</sup> |
|-------|-----------------|--------------------------|---------------------------|-----------------------|
| 1     | <b>L1</b>       | 76                       | 1:1                       | --                    |
| 2     | <b>(S)-L2</b>   | 82                       | 19:1                      | 65                    |
| 3     | <b>(R)-L3</b>   | 24                       | 2:1                       | 28                    |
| 4     | <b>(R,R)-L4</b> | 17                       | 1:1                       | >10                   |
| 5     | <b>(R,R)-L5</b> | 45                       | 15:1                      | 74                    |
| 6     | <b>(R,R)-L6</b> | 77                       | 15:1                      | 82                    |

[a] Reaction conditions:  $\text{Pd}_2(\text{dba})_3 \cdot \text{CHCl}_3$  (2.5 mol%), ligands in entry 2 (10 mol%), ligands in entry 1 and 3-6 (5 mol%), **1a** (0.2 mmol), **2a** (0.24 mmol, 1.2 equiv), DCM (1.0 mL, 0.2 M), 0 °C, 24 hours. [b] Isolated yields. [c] Determined by <sup>1</sup>H-NMR of the crude reaction mixture [d] Determined by HPLC using a Chiralcel IC Column.

**Table S2.** Evaluation of solvents for asymmetric Pd-catalyzed amination of allylic cyclic carbonate **1a** with Phenyl tetrazole **2a**<sup>[a]</sup>

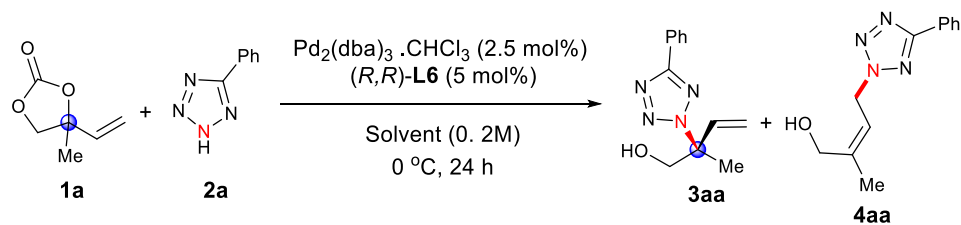

| entry          | solvent            | yield (%) <sup>[b]</sup> | <i>b/l</i> <sup>[c]</sup> | ee (%) <sup>[d]</sup> |
|----------------|--------------------|--------------------------|---------------------------|-----------------------|
| 1              | THF                | 54                       | 15:1                      | 85                    |
| 2              | toluene            | 89                       | >19:1                     | 92                    |
| 3              | 1,4-dioxane        | 40                       | 10:1                      | 72                    |
| 4              | CH <sub>3</sub> CN | 63                       | 10:1                      | 65                    |
| 5              | Et <sub>2</sub> O  | 70                       | 15:1                      | 82                    |
| 6              | DCE                | 67                       | 19:1                      | 79                    |
| 7              | EtOH               | 80                       | 19:1                      | 45                    |
| 8 <sup>e</sup> | toluene            | 38                       | 10:1                      | 87                    |

[a] Reaction conditions:  $\text{Pd}_2(\text{dba})_3 \cdot \text{CHCl}_3$  (2.5 mol%),  $(R,R)\text{-L6}$  (5 mol%), **1a** (0.2 mmol), **2a** (0.24 mmol, 1.2 equiv), solvent (1.0 mL, 0.2 M), 0 °C, 24 hours. [b] Isolated yields. [c] Determined by <sup>1</sup>H-NMR of the crude reaction mixture. [d] Determined by HPLC using a Chiralcel IC Column. [e] Reaction was performed at 20 °C temperature.

## General procedure for allylic substitution of vinyl cyclic carbonates **1** with tetrazole **2a**

To an oven dried screw-cap reaction tube equipped with a magnetic stir bar, Pd<sub>2</sub>(dba)<sub>3</sub>·CHCl<sub>3</sub> (5.2 mg, 2.5 mol%), Trost's ligand (*R,R*)-**L6** (7.8 mg, 5 mol%), vinyl cyclic carbonate **1a** (25.6 mg, 0.2 mmol), and phenyltetrazole **2a** (35.08 mg, 0.24 mmol) were added. The reaction tube was sealed with rubber-septum, then evacuated and backfilled with nitrogen. Anhydrous toluene (0.2 M, 1 mL) was added via syringe. The resulting mixture was stirred at 0 °C for 24 hours. The residue was purified by flash column chromatography on silica gel to afford the pure branched product **3aa**. The enantiomeric excesses of the products were determined by HPLC analysis using chiral stationary phases as indicated for each case.

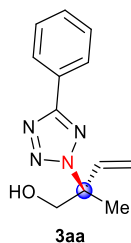

**(*R*)-2-methyl-2-(5-phenyl-2H-tetrazol-2-yl)but-3-en-1-ol (3aa)** was prepared according to the general procedure from **1a** and **2a**. The crude product was purified by flash column chromatography (Petroleum ether/EtOAc = 20:1) on silica gel to provide the title compound as a colorless oil in 89% yield (41.0 mg).  $[\alpha]_D^{25} = 20.5$  ( $c = 0.12$ , CHCl<sub>3</sub>); **<sup>1</sup>H NMR** (400 MHz, CDCl<sub>3</sub>)  $\delta$  8.16–8.14 (m, 2H), 7.52–7.46 (m, 3H) 6.21 (dd,  $J = 10.8, 17.4$  Hz, 1H), 5.37 (d,  $J = 10.8$  Hz, 1H), 5.14 (d,  $J = 17.6$  Hz, 1H), 4.28 (dd,  $J = 7.1, 12.3$  Hz, 1H), 4.05 (dd,  $J = 7.0, 12.3$  Hz, 1H), 3.03 (brt, 1H), 1.91 (s, 3H); **<sup>13</sup>C NMR** (100 MHz, CDCl<sub>3</sub>)  $\delta$  164.6, 137.1, 130.4, 128.9, 127.1, 126.9, 117.3, 71.0, 68.4, 21.7; **HRMS (ESI-MS)**: Calcd. for C<sub>12</sub>H<sub>14</sub>N<sub>4</sub>O (M + Na): 253.1065, Found: 253.1057; **HPLC conditions**: Chiralcel IC column, 254 nm, flow rate: 1 ml/min, *i*-PrOH/hexanes = 1/19,  $t_{\text{major}} = 24.2$  min,  $t_{\text{minor}} = 29.1$  min; 92% ee.

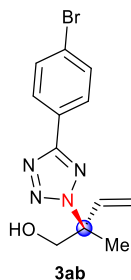

**(*R*)-2-(5-(4-bromophenyl)-2H-tetrazol-2-yl)-2-methylbut-3-en-1-ol (3ab)** was prepared according to the general procedure from **1a** and **2b**. The crude product was purified by flash column chromatography

(Petroleum ether/EtOAc = 20:1) on silica gel to provide the title compound as a colorless oil in 87% yield (53.8 mg).  $[\alpha]_{\text{D}}^{25} = -14.2$  ( $c = 1.03$ ,  $\text{CHCl}_3$ );  $^1\text{H NMR}$  (400 MHz,  $\text{CDCl}_3$ )  $\delta$  8.03–7.99 (m, 2H), 7.63–7.60 (m, 2H) 6.20 (dd,  $J = 10.8, 17.4$  Hz, 1H), 5.38 (d,  $J = 10.8$  Hz, 1H), 5.16 (d,  $J = 17.6$  Hz, 1H), 4.29 (d,  $J = 12.3$  Hz, 1H), 4.04 (dd,  $J = 12.8$  Hz, 1H), 2.97 (brs, 1H), 1.91 (s, 3H);  $^{13}\text{C NMR}$  (100 MHz,  $\text{CDCl}_3$ )  $\delta$  163.8, 137.0, 132.1, 128.4, 126.1, 124.8, 117.3, 71.2, 68.3, 21.5; **HRMS (ESI-MS)**: Calcd. for  $\text{C}_{12}\text{H}_{13}\text{BrN}_4\text{O}$  ( $M + \text{Na}$ ): 331.0170, Found: 331.0170; **HPLC conditions**: Chiralcel IC column, 254 nm, flow rate: 1 ml/min,  $i\text{-PrOH/hexanes} = 20/80$ ,  $t_{\text{major}} = 6.5$  min,  $t_{\text{minor}} = 7.5$  min; 96% ee.

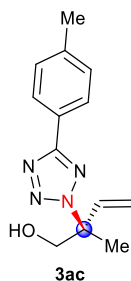

**(R)-2-methyl-2-(5-(p-tolyl)-2H-tetrazol-2-yl)but-3-en-1-ol (3ac)** was prepared according to the general procedure from **1a** and **2c**. The crude product was purified by flash column chromatography (Petroleum ether/EtOAc = 20:1) on silica gel to provide the title compound as a colorless oil in 93% yield (45.4 mg).  $[\alpha]_{\text{D}}^{25} = -6.5$  ( $c = 0.74$ ,  $\text{CHCl}_3$ );  $^1\text{H NMR}$  (400 MHz,  $\text{CDCl}_3$ )  $\delta$  8.03 (d,  $J = 8.2$  Hz, 2H), 7.28 (d,  $J = 8.0$  Hz, 2H), 6.20 (dd,  $J = 10.8, 17.4$  Hz, 1H), 5.35 (d,  $J = 10.8$  Hz, 1H), 5.13 (d,  $J = 17.6$  Hz, 1H), 4.26 (dd,  $J = 5.6, 12.1$  Hz, 1H), 4.03 (dd,  $J = 5.6, 12.1$  Hz, 1H), 3.12 (brt, 1H), 2.41 (s, 3H), 1.90 (s, 3H);  $^{13}\text{C NMR}$  (100 MHz,  $\text{CDCl}_3$ )  $\delta$  164.7, 140.6, 137.1, 129.5, 126.8, 124.4, 117.2, 70.9, 68.4, 29.7, 21.6; **HRMS (ESI-MS)**: Calcd. for  $\text{C}_{13}\text{H}_{16}\text{N}_4\text{O}$  ( $M + \text{Na}$ ): 267.1222, Found: 267.1213; **HPLC conditions**: Chiralcel IC column, 254 nm, flow rate: 1 ml/min,  $i\text{-PrOH/hexanes} = 20/80$ ,  $t_{\text{major}} = 8.2$  min,  $t_{\text{minor}} = 9.5$  min; 92% ee.

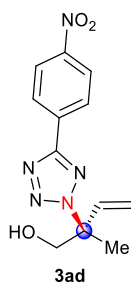

**(R)-2-methyl-2-(5-(4-nitrophenyl)-2H-tetrazol-2-yl)but-3-en-1-ol (3ad)** was prepared according to the general procedure from **1a** and **2d**. The crude product was purified by flash column chromatography (Petroleum ether/EtOAc = 20:1) on silica gel to provide the title compound as a white solid in 94% yield

(51.7 mg).  $[\alpha]_D^{25} = 27.5$  ( $c = 0.61$ ,  $\text{CHCl}_3$ );  $^1\text{H NMR}$  (400 MHz,  $\text{CDCl}_3$ )  $\delta$  8.35 (s, 4H), 6.23 (dd,  $J = 10.8$ , 17.4 Hz, 1H), 5.41 (d,  $J = 10.8$  Hz, 1H), 5.20 (d,  $J = 17.6$  Hz, 1H), 4.33 (d,  $J = 12.2$  Hz, 1H), 4.07 (d,  $J = 12.2$  Hz, 1H), 2.81 (brs, 1H), 1.95 (s, 3H);  $^{13}\text{C NMR}$  (100 MHz,  $\text{CDCl}_3$ )  $\delta$  162.8, 148.9, 136.7, 133.1, 127.7, 124.2, 117.6, 71.6, 68.2, 21.5; **HRMS (ESI-MS)**: Calcd. for  $\text{C}_{12}\text{H}_{13}\text{N}_5\text{O}_3$  ( $\text{M} + \text{Na}$ ): 298.0916, Found: 298.0938; **HPLC conditions**: Chiralcel IC column, 254 nm, flow rate: 1 ml/min, *i*-PrOH/hexanes = 10/90,  $t_{\text{major}} = 14.3$  min,  $t_{\text{minor}} = 17.1$  min; 90% ee.

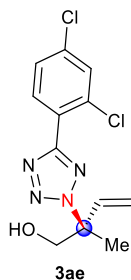

**(R)-2-(5-(2,4-dichlorophenyl)-2H-tetrazol-2-yl)-2-methylbut-3-en-1-ol (3ae)** was prepared according to the general procedure from **1a** and **2e**. The crude product was purified by flash column chromatography (Petroleum ether/EtOAc = 20:1) on silica gel to provide the title compound as a colorless oil in 87% yield (52.1 mg).  $[\alpha]_D^{25} = -13.4$  ( $c = 0.12$ ,  $\text{CHCl}_3$ );  $^1\text{H NMR}$  (400 MHz,  $\text{CDCl}_3$ )  $\delta$  7.99–7.95 (m, 1H), 7.58–7.55 (m, 1H), 7.41–7.37 (m, 1H), 6.22 (dd,  $J = 10.8$ , 17.4 Hz, 1H), 5.39 (d,  $J = 10.8$  Hz, 1H), 5.16 (d,  $J = 17.6$  Hz, 1H), 4.28 (d,  $J = 10.8$  Hz, 1H), 4.05 (d,  $J = 10.8$  Hz, 1H), 3.04 (brs, 1H), 1.93 (s, 3H);  $^{13}\text{C NMR}$  (100 MHz,  $\text{CDCl}_3$ )  $\delta$  162.0, 136.8, 136.7, 133.8, 132.0, 130.8, 127.4, 124.8, 117.5, 71.4, 86.4, 21.7; **HRMS (ESI-MS)**: Calcd. for  $\text{C}_{12}\text{H}_{12}\text{Cl}_2\text{N}_4\text{O}$  ( $\text{M} + \text{Na}$ ): 321.0286, Found: 321.0280; **HPLC conditions**: Chiralcel IC column, 254 nm, flow rate: 1 ml/min, *i*-PrOH/hexanes = 20/80,  $t_{\text{major}} = 6.7$  min,  $t_{\text{minor}} = 8.4$  min; 90% ee.

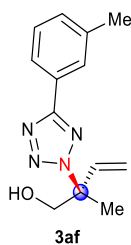

**(R)-2-methyl-2-(5-(m-tolyl)-2H-tetrazol-2-yl)but-3-en-1-ol (3af)** was prepared according to the general procedure from **1a** and **2f**. The crude product was purified by flash column chromatography (Petroleum ether/EtOAc = 20:1) on silica gel to provide the title compound as a colorless oil in 84% yield (41.1 mg).  $[\alpha]_D^{25} = -14.8$  ( $c = 1.10$ ,  $\text{CHCl}_3$ );  $^1\text{H NMR}$  (400 MHz,  $\text{CDCl}_3$ )  $\delta$  7.94 (s, 2H), 7.39–7.34 (m, 1H), 7.28 (s,

1H), 6.20 (dd,  $J = 10.8, 17.4$  Hz, 1H), 5.36 (d,  $J = 10.8$  Hz, 1H), 5.13 (d,  $J = 17.6$  Hz, 1H), 4.29 (d,  $J = 10.8$  Hz, 1H), 4.04 (d,  $J = 10.8$  Hz, 1H), 3.16 (brs, 1H), 2.42 (s, 3H), 1.91 (s, 3H);  $^{13}\text{C}$  NMR (100 MHz,  $\text{CDCl}_3$ )  $\delta$  164.8, 138.7, 137.1, 131.2, 128.8, 127.5, 127.0, 124.0, 117.3, 71.0, 68.4, 21.7, 21.4; **HRMS (ESI-MS)**: Calcd. for  $\text{C}_{13}\text{H}_{16}\text{N}_4\text{O}$  ( $\text{M} + \text{Na}$ ): 267.1222, Found: 267.1219; **HPLC conditions**: Chiralcel IC column, 254 nm, flow rate: 1 ml/min, *i*-PrOH/hexanes = 10/90,  $t_{\text{major}} = 14.7$  min,  $t_{\text{minor}} = 18.4$  min; 90% ee.

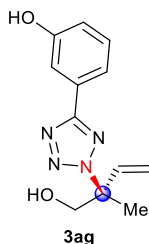

**(R)-3-(2-(1-hydroxy-2-methylbut-3-en-2-yl)-2H-tetrazol-5-yl)phenol (3ag)** was prepared according to the general procedure from **1a** and **2g**. The crude product was purified by flash column chromatography (Petroleum ether/EtOAc = 20:1) on silica gel to provide the title compound as a colorless oil in 83% yield (40.8 mg).  $[\alpha]_{\text{D}}^{25} = 6.2$  ( $c = 0.21$ ,  $\text{CHCl}_3$ );  $^1\text{H}$  NMR (400 MHz,  $\text{CDCl}_3$ )  $\delta$  7.67–7.64 (m, 2H), 7.35–7.31 (m, 1H), 6.98–6.95 (m, 1H), 6.20 (dd,  $J = 10.8, 17.4$  Hz, 1H), 5.36 (d,  $J = 10.8$  Hz, 1H), 5.14 (d,  $J = 17.4$  Hz, 1H), 4.32 (dd,  $J = 6.0, 11.7$  Hz, 1H), 4.05 (dd,  $J = 6.0, 11.7$  Hz, 1H), 3.41 (brt, 1H), 1.91 (s, 3H);  $^{13}\text{C}$  NMR (100 MHz,  $\text{CDCl}_3$ )  $\delta$  164.3, 156.3, 136.9, 130.3, 128.1, 119.1, 117.8, 117.4, 113.7, 71.2, 68.3, 21.5; **HRMS (ESI-MS)**: Calcd. for  $\text{C}_{12}\text{H}_{14}\text{N}_4\text{O}_2$  ( $\text{M} + \text{Na}$ ): 269.1014, Found: 269.1012; **HPLC conditions**: Chiralcel OD-H column, 254 nm, flow rate: 1 ml/min, *i*-PrOH/hexanes = 20/80,  $t_{\text{major}} = 7.4$  min,  $t_{\text{minor}} = 8.5$  min; 89% ee.

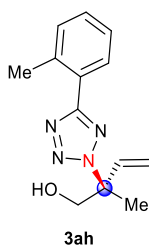

**(R)-2-methyl-2-(5-(o-tolyl)-2H-tetrazol-2-yl)but-3-en-1-ol (3ah)** was prepared according to the general procedure from **1a** and **2h**. The crude product was purified by flash column chromatography (Petroleum ether/EtOAc = 20:1) on silica gel to provide the title compound as a colorless oil in 97% yield (47.4 mg).  $[\alpha]_{\text{D}}^{25} = -21.4$  ( $c = 0.54$ ,  $\text{CHCl}_3$ );  $^1\text{H}$  NMR (400 MHz,  $\text{CDCl}_3$ )  $\delta$  8.02 (d,  $J = 7.3$  Hz, 1H), 7.39–7.29 (m, 3H), 6.21 (dd,  $J = 10.8, 17.4$  Hz, 1H), 5.37 (d,  $J = 10.8$  Hz, 1H), 5.13 (d,  $J = 17.6$  Hz, 1H), 4.27 (dd,  $J = 6.4, 12.0$  Hz, 1H), 4.05 (dd,  $J = 6.4, 12.0$  Hz, 1H), 3.03 (brt, 1H), 2.62 (s, 3H), 1.92 (s, 3H);  $^{13}\text{C}$  NMR



(100 MHz, CDCl<sub>3</sub>)  $\delta$  165.0, 137.4, 137.1, 131.4, 130.0, 129.5, 126.3, 126.0, 117.2, 70.9, 68.4, 29.7, 21.7; **HRMS (ESI-MS)**: Calcd. for C<sub>13</sub>H<sub>16</sub>N<sub>4</sub>O (M + Na): 267.1222, Found: 267.1216; **HPLC conditions**: Chiralcel IC column, 254 nm, flow rate: 1 ml/min, *i*-PrOH/hexanes = 20/80,  $t_{\text{major}} = 6.8$  min,  $t_{\text{minor}} = 8.3$  min; 90% ee.

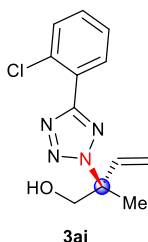

**(R)-2-(5-(2-chlorophenyl)-2H-tetrazol-2-yl)-2-methylbut-3-en-1-ol (3ai)** was prepared according to the general procedure from **1a** and **2i**. The crude product was purified by flash column chromatography (Petroleum ether/EtOAc = 20:1) on silica gel to provide the title compound as a colorless oil in 96% yield (50.8 mg).  $[\alpha]_{\text{D}}^{25} = -10.8$  ( $c = 0.70$ , CHCl<sub>3</sub>); **<sup>1</sup>H NMR** (400 MHz, CDCl<sub>3</sub>)  $\delta$  8.00–7.96 (s, 1H), 7.55–7.52 (m, 1H), 7.44–7.36 (m, 2H), 6.22 (dd,  $J = 10.8, 17.6$  Hz, 1H), 5.38 (d,  $J = 10.8$  Hz, 1H), 5.15 (d,  $J = 17.6$  Hz, 1H), 4.28 (d,  $J = 12.3$  Hz, 1H), 4.06 (d,  $J = 12.3$  Hz, 1H), 3.18 (brs, 1H), 1.93 (s, 3H); **<sup>13</sup>C NMR** (100 MHz, CDCl<sub>3</sub>)  $\delta$  162.6, 136.9, 133.1, 131.2, 131.1, 130.8, 126.9, 126.2, 117.3, 71.2, 68.4, 21.6; **HRMS (ESI-MS)**: Calcd. for C<sub>12</sub>H<sub>13</sub>ClN<sub>4</sub>O (M + Na): 287.0676, Found: 287.0682; **HPLC conditions**: Chiralcel IC column, 254 nm, flow rate: 1 ml/min, *i*-PrOH/hexanes = 5/95,  $t_{\text{major}} = 27.3$  min,  $t_{\text{minor}} = 40.1$  min; 87% ee.

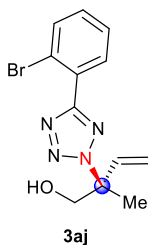

**(R)-2-(5-(2-bromophenyl)-2H-tetrazol-2-yl)-2-methylbut-3-en-1-ol (3aj)** was prepared according to the general procedure from **1a** and **2j**. The crude product was purified by flash column chromatography (Petroleum ether/EtOAc = 20:1) on silica gel to provide the title compound as a colorless oil in 83% yield (51.3 mg).  $[\alpha]_{\text{D}}^{25} = 12.1$  ( $c = 0.56$ , CHCl<sub>3</sub>); **<sup>1</sup>H NMR** (400 MHz, CDCl<sub>3</sub>)  $\delta$  7.92 (dd,  $J = 1.7, 7.7$  Hz, 1H), 7.74 (dd,  $J = 1.0, 8.0$  Hz, 1H), 7.45 (ddd,  $J = 1.2, 7.5, 15.1$  Hz, 1H), 7.35 (dd,  $J = 1.8, 8.0$  Hz, 1H), 6.22 (dd,  $J = 10.8, 17.6$  Hz, 1H), 5.38 (d,  $J = 10.8$  Hz, 1H), 5.15 (d,  $J = 17.6$  Hz, 1H), 4.27 (d,  $J = 12.3$  Hz, 1H), 4.05 (d,  $J = 12.3$  Hz, 1H), 3.16 (brs, 1H), 1.93 (s, 3H); **<sup>13</sup>C NMR** (100 MHz, CDCl<sub>3</sub>)  $\delta$  163.4, 136.9,

134.1, 131.5, 131.3, 128.2, 127.5, 122.1, 117.3, 71.2, 68.4, 21.6; **HRMS (ESI-MS)**: Calcd. for  $C_{12}H_{13}BrN_4O$  (M + Na): 331.0170, Found: 331.0175; **HPLC conditions**: Chiralcel IC column, 254 nm, flow rate: 1 ml/min, *i*-PrOH/hexanes = 1/19,  $t_{major}$  = 28.4 min,  $t_{minor}$  = 40.5 min; 88% ee.

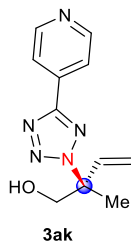

**(R)-2-(5-(2-bromophenyl)-2H-tetrazol-2-yl)-2-methylbut-3-en-1-ol (3ak)** was prepared according to the general procedure from **1a** and **2k**. The crude product was purified by flash column chromatography (Petroleum ether/EtOAc = 20:1) on silica gel to provide the title compound as a colorless oil in 82% yield (37.9 mg).  $[\alpha]_D^{25} = -21.3$  ( $c = 1.1$ ,  $CHCl_3$ );  **$^1H$  NMR** (400 MHz,  $CDCl_3$ )  $\delta$  8.70 (dd,  $J = 1.6, 4.6$  Hz, 2H), 8.00 (dd,  $J = 1.6, 4.5$  Hz, 2H), 6.24 (dd,  $J = 10.8, 17.6$  Hz, 1H), 5.40 (d,  $J = 10.8$  Hz, 1H), 5.19 (d,  $J = 17.6$  Hz, 1H), 4.33 (d,  $J = 12.2$  Hz, 1H), 4.06 (d,  $J = 12.2$  Hz, 1H), 1.95 (s, 3H);  **$^{13}C$  NMR** (100 MHz,  $CDCl_3$ )  $\delta$  162.5, 150.3, 136.8, 120.9, 119.1, 117.5, 71.7, 68.3, 21.5; **HRMS (ESI-MS)**: Calcd. for  $C_{11}H_{13}N_5O$  (M + Na): 254.1018, Found: 254.1025; **HPLC conditions**: Chiralcel IC column, 254 nm, flow rate: 1 ml/min, *i*-PrOH/hexanes = 1/19,  $t_{major}$  = 41.0 min,  $t_{minor}$  = 45.5 min; 98% ee.

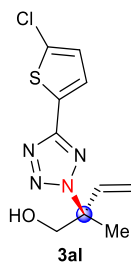

**(R)-2-(5-(5-chlorothiophen-2-yl)-2H-tetrazol-2-yl)-2-methylbut-3-en-1-ol (3al)** was prepared according to the general procedure from **1a** and **2l**. The crude product was purified by flash column chromatography (Petroleum ether/EtOAc = 20:1) on silica gel to provide the title compound as a colorless oil in 83% yield (44.9 mg).  $[\alpha]_D^{25} = -22.1$  ( $c = 1.02$ ,  $CHCl_3$ );  **$^1H$  NMR** (400 MHz,  $CDCl_3$ )  $\delta$  7.57 (d,  $J = 4.0$  Hz, 1H), 6.96 (d,  $J = 4.0$  Hz, 1H), 6.19 (dd,  $J = 10.8, 17.6$  Hz, 1H), 5.37 (d,  $J = 10.8$  Hz, 1H), 5.16 (d,  $J = 17.6$  Hz, 1H), 4.26 (dd,  $J = 4.0, 12.1$  Hz, 1H), 4.01 (dd,  $J = 4.0, 12.1$  Hz, 1H), 2.93 (brs, 1H), 1.89 (s, 3H);  **$^{13}C$  NMR** (100 MHz,  $CDCl_3$ )  $\delta$  159.9, 136.8, 133.0, 127.4, 127.2, 127.0, 117.4, 71.3, 68.2, 21.5; **HRMS (ESI-MS)**: Calcd. for  $C_{10}H_{11}ClN_4OS$  (M + Na): 293.0240, Found: 293.0235; **HPLC conditions**:

Chiralcel IC column, 254 nm, flow rate: 1 ml/min, *i*-PrOH/hexanes = 10/90,  $t_{\text{major}} = 10.7$  min,  $t_{\text{minor}} = 12.9$  min; 86% ee.

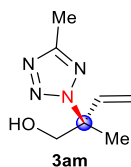

**(*R*)-2-methyl-2-(5-methyl-2H-tetrazol-2-yl)but-3-en-1-ol (3am)** was prepared according to the general procedure from **1a** and **2m**. The crude product was purified by flash column chromatography (Petroleum ether/EtOAc = 20:1) on silica gel to provide the title compound as a colorless oil in 78% yield (26.2 mg).  $[\alpha]_{\text{D}}^{25} = 38.3$  ( $c = 0.10$ ,  $\text{CHCl}_3$ );  $^1\text{H NMR}$  (400 MHz,  $\text{CDCl}_3$ )  $\delta$  6.15 (dd,  $J = 10.8, 17.6$  Hz, 1H), 5.35 (d,  $J = 10.8$  Hz, 1H), 5.13 (d,  $J = 17.6$  Hz, 1H), 4.20 (dd,  $J = 6.8, 12.1$  Hz, 1H), 3.98 (dd,  $J = 6.8, 12.1$  Hz, 1H), 3.05 (brt, 1H), 2.55 (s, 3H), 1.83 (s, 3H);  $^{13}\text{C NMR}$  (100 MHz,  $\text{CDCl}_3$ )  $\delta$  162.5, 137.1, 117.1, 70.5, 68.3, 21.5, 10.9;

For the determination of enantiomeric excess of **3am**, compound **3am** was converted to corresponding benzoate **4am**. The ee value of **4am** was determined by chiral HPLC

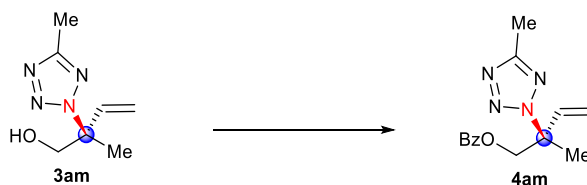

**(*R*)-2-methyl-2-(5-methyl-2H-tetrazol-2-yl)but-3-en-1-yl benzoate (4am)** was obtained as a white solid;  $^1\text{H NMR}$  (400 MHz,  $\text{CDCl}_3$ )  $\delta$  7.90–7.88 (m, 2H), 7.57–7.53 (m, 1H), 7.43–7.39 (m, 2H), 6.34 (dd,  $J = 10.8, 17.6$  Hz, 1H), 5.42 (d,  $J = 10.8$  Hz, 1H), 5.29 (d,  $J = 17.6$  Hz, 1H), 4.87 (d,  $J = 11.7$  Hz, 1H), 4.79 (d,  $J = 11.7$  Hz, 1H), 2.55 (s, 3H), 2.01 (s, 3H);  $^{13}\text{C NMR}$  (100 MHz,  $\text{CDCl}_3$ )  $\delta$  166.3, 161.3, 136.2, 133.4, 129.7, 129.4, 129.2, 117.9, 68.7, 58.5, 18.4, 13.7; **HRMS (ESI-MS)**: Calcd. for  $\text{C}_{14}\text{H}_{16}\text{N}_4\text{O}_2$  ( $\text{M} + \text{Na}$ ): 295.1171, Found: 295.1166; **HPLC conditions**: Chiralcel IC column, 254 nm, flow rate: 1 ml/min, *i*-PrOH/hexanes = 1/19,  $t_{\text{major}} = 22.6$  min,  $t_{\text{minor}} = 24.3$  min; 90% ee.

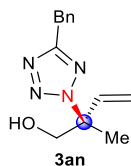

**(R)-2-(5-benzyl-2H-tetrazol-2-yl)-2-methylbut-3-en-1-ol (3an)** was prepared according to the general procedure from **1a** and **2n**. The crude product was purified by flash column chromatography (Petroleum ether/EtOAc = 20:1) on silica gel to provide the title compound as a colorless oil in 88% yield (42.9 mg).  $[\alpha]_D^{25} = 68.9$  ( $c = 0.07$ ,  $\text{CHCl}_3$ );  $^1\text{H NMR}$  (400 MHz,  $\text{CDCl}_3$ )  $\delta$  7.36–7.22 (m, 5H), 6.13 (dd,  $J = 10.8$ , 17.6 Hz, 1H), 5.34 (d,  $J = 10.8$  Hz, 1H), 5.07 (d,  $J = 17.6$  Hz, 1H), 4.26 (s, 2H), 4.19 (d,  $J = 12.3$  Hz, 1H), 3.96 (d,  $J = 12.3$  Hz, 1H), 2.85 (brs, 1H), 1.83 (s, 3H);  $^{13}\text{C NMR}$  (100 MHz,  $\text{CDCl}_3$ )  $\delta$  165.1, 137.1, 136.6, 128.8, 128.7, 126.9, 117.2, 70.8, 68.3, 31.8, 21.6; **HRMS (ESI-MS)**: Calcd. for  $\text{C}_{13}\text{H}_{16}\text{N}_4\text{O}$  ( $M + \text{Na}$ ): 267.1222, Found: 267.1217; **HPLC conditions**: Chiralcel IC column, 254 nm, flow rate: 1 ml/min,  $i$ -PrOH/hexanes = 10/90,  $t_{\text{major}} = 8.4$  min,  $t_{\text{minor}} = 9.5$  min; 90% ee.

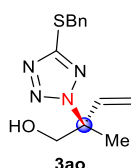

**(R)-2-(5-benzyl-2H-tetrazol-2-yl)-2-methylbut-3-en-1-ol (3ao)** was prepared according to the general procedure from **1a** and **2o**. The crude product was purified by flash column chromatography (Petroleum ether/EtOAc = 20:1) on silica gel to provide the title compound as a colorless oil in 87% yield (48.1 mg).  $[\alpha]_D^{25} = -16.4$  ( $c = 0.55$ ,  $\text{CHCl}_3$ );  $^1\text{H NMR}$  (400 MHz,  $\text{CDCl}_3$ )  $\delta$  7.39–7.36 (m, 2H), 7.31–7.22 (m, 3H), 6.10 (dd,  $J = 10.8$ , 17.6 Hz, 1H), 5.32 (d,  $J = 10.8$  Hz, 1H), 5.05 (d,  $J = 17.6$  Hz, 1H), 4.40 (s, 2H), 4.16 (dd,  $J = 5.4$ , 12.2 Hz, 1H), 3.92 (dd,  $J = 5.4$ , 12.2 Hz, 1H), 2.69 (brt, 1H), 1.81 (s, 3H);  $^{13}\text{C NMR}$  (100 MHz,  $\text{CDCl}_3$ )  $\delta$  163.2, 136.7, 136.5, 129.0, 128.5, 127.6, 117.3, 71.3, 68.1, 36.5, 21.4; **HRMS (ESI-MS)**: Calcd. for  $\text{C}_{13}\text{H}_{16}\text{N}_4\text{OS}$  ( $M + \text{Na}$ ): 299.0943, Found: 299.0939; **HPLC conditions**: Chiralcel IC column, 254 nm, flow rate: 1 ml/min,  $i$ -PrOH/hexanes = 10/90,  $t_{\text{major}} = 7.4$  min,  $t_{\text{minor}} = 8.5$  min; 81% ee.

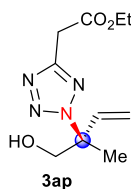

**ethyl (R)-2-(2-(1-hydroxy-2-methylbut-3-en-2-yl)-2H-tetrazol-5-yl)acetate (3ap)** was prepared according to the general procedure from **1a** and **2p**. The crude product was purified by flash column chromatography (Petroleum ether/EtOAc = 20:1) on silica gel to provide the title compound as a colorless oil in 72% yield (34.6 mg).  $[\alpha]_D^{25} = 42.7$  ( $c = 0.67$ ,  $\text{CHCl}_3$ );  $^1\text{H NMR}$  (400 MHz,  $\text{CDCl}_3$ )  $\delta$  6.17 (dd,  $J = 10.8$ , 17.6 Hz, 1H), 5.35 (d,  $J = 10.8$  Hz, 1H), 5.13 (d,  $J = 17.6$  Hz, 1H), 4.28–4.18 (m, 3H), 3.99 (s, 2H),

3.97 (dd,  $J = 4.0, 12.1$  Hz, 1H), 3.05 (brs, 1H), 1.86 (s, 3H), 1.26 (t,  $J = 7.2$  Hz, 3H);  $^{13}\text{C}$  NMR (100 MHz,  $\text{CDCl}_3$ )  $\delta$  168.4, 159.6, 137.0, 117.2, 71.1, 68.2, 61.6, 31.8, 21.4, 14.0;

For the determination of enantiomeric excess of **3ap**, compound **3ap** was converted to corresponding benzoate **4ap**. The ee value of **4ap** was determined by chiral HPLC

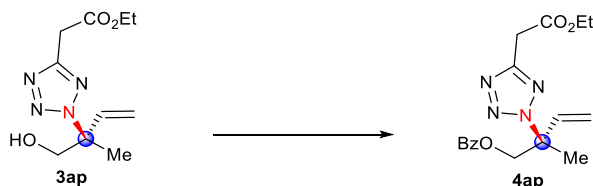

**(R)-2-(5-(2-ethoxy-2-oxoethyl)-2H-tetrazol-2-yl)-2-methylbut-3-en-1-yl benzoate (4ap)** was obtained as a white solid;  $^1\text{H}$  NMR (400 MHz,  $\text{CDCl}_3$ )  $\delta$  7.90–7.87 (m, 2H), 7.54–7.50 (m, 1H), 7.40–7.36 (m, 2H), 6.33 (dd,  $J = 10.8, 17.6$  Hz, 1H), 5.41 (d,  $J = 10.8$  Hz, 1H), 5.26 (d,  $J = 17.6$  Hz, 1H), 4.89 (d,  $J = 11.4$  Hz, 1H), 4.81 (d,  $J = 11.4$  Hz, 1H), 4.15 (dd,  $J = 7.1, 14.2$  Hz, 2H), 4.02 (s, 3H), 2.03 (s, 3H), 1.19 (t,  $J = 7.1$  Hz, 3H);  $^{13}\text{C}$  NMR (100 MHz,  $\text{CDCl}_3$ )  $\delta$  168.3, 165.7, 159.9, 136.1, 133.3, 129.6, 129.3, 117.8, 68.7, 68.3, 61.5, 31.9, 21.6, 13.9; **HRMS (ESI-MS)**: Calcd. for  $\text{C}_{17}\text{H}_{20}\text{N}_4\text{O}_4$  ( $M + \text{Na}$ ): 367.1382, Found: 367.1376; **HPLC conditions**: Chiralcel IC column, 254 nm, flow rate: 1 ml/min, *i*-PrOH/hexanes = 20/80,  $t_{\text{major}} = 7.7$  min,  $t_{\text{minor}} = 9.5$  min; 89% ee.

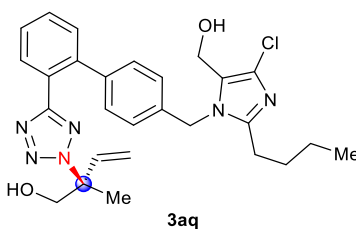

**(R)-2-(5-(4'-((2-butyl-4-chloro-5-(hydroxymethyl)-1H-imidazol-1-yl)methyl)-[1,1'-biphenyl]-2-yl)-2H-tetrazol-2-yl)-2-methylbut-3-en-1-ol (3aq)** was prepared according to the general procedure from **1a** and **2q**. The crude product was purified by flash column chromatography (Petroleum ether/EtOAc = 4:1) on silica gel to provide the title compound as a white solid in 67% yield (67.9 mg).  $[\alpha]_{\text{D}}^{25} = 35.3$  ( $c = 0.12$ ,  $\text{CHCl}_3$ );  $^1\text{H}$  NMR (400 MHz,  $\text{CDCl}_3$ )  $\delta$  8.06–8.04 (m, 1H), 7.57–7.50 (m, 2H), 7.42–7.40 (m, 1H), 7.17 (d,  $J = 8.0$  Hz, 1H), 6.97 (d,  $J = 8.0$  Hz, 1H), 6.01 (dd,  $J = 10.8, 17.6$  Hz, 1H), 5.26 (d,  $J = 10.8$  Hz, 1H), 5.26 (s, 2H), 4.94 (d,  $J = 17.6$  Hz, 1H), 4.52 (s, 2H), 3.85 (d,  $J = 12.4$  Hz, 1H), 3.69 (d,  $J = 12.4$  Hz, 1H), 2.61 (t,  $J = 7.6, 15.6$  Hz, 2H), 1.75 (s, 3H), 1.73–1.66 (m, 2H), 1.40–1.30 (m, 2H), 0.91 (t,  $J = 7.6, 15.6$  Hz, 3H);  $^{13}\text{C}$  NMR (100 MHz,  $\text{CDCl}_3$ )  $\delta$  164.0, 148.4, 141.0, 140.9, 136.8, 135.0, 130.8, 130.6, 130.1, 130.0, 129.6, 128.7, 127.9, 125.7, 125.4, 117.0, 70.6, 68.1, 47.2, 38.6, 28.8, 26.5, 23.7, 22.3, 13.7; **HRMS**

**(ESI-MS):** Calcd. for C<sub>27</sub>H<sub>13</sub>ClN<sub>6</sub>O<sub>2</sub> (M + Na): 529.2095, Found: 529.2086; **HPLC conditions:** Chiralcel IC column, 254 nm, flow rate: 1 ml/min, *i*-PrOH/hexanes = 10/90, *t*<sub>major</sub> = 48.87 min, *t*<sub>minor</sub> = 61.92 min; 97% ee.

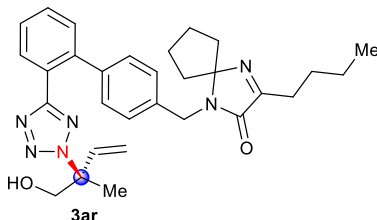

**(R)-2-(5-(4'-((2-butyl-4-chloro-5-(hydroxymethyl)-1H-imidazol-1-yl)methyl)-[1,1'-biphenyl]-2-yl)-2H-tetrazol-2-yl)-2-methylbut-3-en-1-ol (3ar)** was prepared according to the general procedure from **1a** and **2r**. The crude product was purified by flash column chromatography (Petroleum ether/EtOAc = 4:1) on silica gel to provide the title compound as a white solid in 74% yield (75.9 mg).  $[\alpha]_D^{25} = -19.4$  (*c* = 0.81, CHCl<sub>3</sub>); **<sup>1</sup>H NMR** (400 MHz, CDCl<sub>3</sub>) δ 8.00 (dd, *J* = 1.6, 6.8 Hz, 1H), 7.56–7.48 (m, 2H), 7.41 (dd, *J* = 1.4, 7.2 Hz, 1H), 7.15 (d, *J* = 8.0 Hz, 1H), 7.10 (d, *J* = 8.0 Hz, 1H), 6.00 (dd, *J* = 10.8, 17.6 Hz, 1H), 5.25 (d, *J* = 10.8 Hz, 1H), 4.93 (d, *J* = 17.6 Hz, 1H), 4.69 (s, 2H), 3.83 (d, *J* = 11.6 Hz, 1H), 3.67 (d, *J* = 11.6 Hz, 1H), 2.69 (brs, 1H), 2.37 (t, *J* = 7.6, 15.6 Hz, 2H), 2.02–1.93 (m, 6H), 1.86–1.77 (m, 2H), 1.71 (s, 3H), 1.66–1.59 (m, 2H), 1.39–1.34 (m, 2H), 0.90 (t, *J* = 7.6, 15.6 Hz, 3H); **<sup>13</sup>C NMR** (100 MHz, CDCl<sub>3</sub>) δ 186.7, 164.1, 161.8, 141.2, 140.8, 136.9, 135.4, 130.5, 130.0, 129.9, 129.6, 127.8, 126.2, 126.0, 116.9, 76.5, 70.6, 68.0, 43.2, 37.3, 37.2, 28.7, 27.7, 26.0, 22.3, 21.3, 13.7; **HRMS (ESI-MS):** Calcd. for C<sub>30</sub>H<sub>36</sub>N<sub>6</sub>O<sub>2</sub> (M + Na): 535.2797, Found: 535.2802; **HPLC conditions:** Chiralcel IC column, 254 nm, flow rate: 1 ml/min, *i*-PrOH/hexanes = 20/80, *t*<sub>major</sub> = 10.5 min, *t*<sub>minor</sub> = 12.6 min; 95% ee.

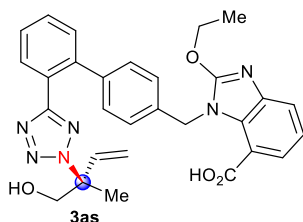

**(R)-2-(5-(4'-((2-butyl-4-chloro-5-(hydroxymethyl)-1H-imidazol-1-yl)methyl)-[1,1'-biphenyl]-2-yl)-2H-tetrazol-2-yl)-2-methylbut-3-en-1-ol (3as)** was prepared according to the general procedure from **1a** and **2s**. The crude product was purified by flash column chromatography (Petroleum ether/EtOAc = 4:1) on silica gel to provide the title compound as a white solid in 52% yield (54.6 mg).  $[\alpha]_D^{25} = -42.5$  (*c* = 0.70, CHCl<sub>3</sub>); **<sup>1</sup>H NMR** (400 MHz, CDCl<sub>3</sub>) δ 7.91 (dd, *J* = 1.6, 7.6 Hz, 1H), 7.71 (d, *J* = 7.6 Hz, 1H), 7.57

(d,  $J = 7.6$  Hz, 1H), 7.53–7.44 (m, 2H), 7.37 (dd,  $J = 1.4, 7.6$  Hz, 1H), 7.16 (t,  $J = 7.6, 15.6$  Hz, 1H), 7.04 (d,  $J = 8.0$  Hz, 2H), 6.96 (d,  $J = 8.0$  Hz, 2H), 5.88 (dd,  $J = 10.8, 17.6$  Hz, 1H), 5.64 (s, 2H), 5.10 (d,  $J = 10.8$  Hz, 1H), 4.83 (d,  $J = 17.6$  Hz, 1H), 4.65 (dd,  $J = 7.2, 14.4$  Hz, 2H), 3.81 (s, 3H), 3.78 (dd,  $J = 6.8, 12.0$  Hz, 1H), 3.60 (dd,  $J = 6.8, 12.0$  Hz, 1H), 2.48 (brt, 1H), 1.59 (s, 3H), 1.48 (t,  $J = 6.8, 14.0$  Hz, 3H);  $^{13}\text{C}$  NMR (100 MHz,  $\text{CDCl}_3$ )  $\delta$  166.8, 164.2, 158.7, 141.8, 141.5, 140.1, 136.8, 136.2, 131.4, 130.6, 130.0, 129.9, 129.2, 127.6, 126.3, 125.9, 123.7, 121.9, 120.8, 116.8, 115.6, 70.51, 68.0, 66.7, 52.2, 21.2, 14.6; **HRMS (ESI-MS)**: Calcd. for  $\text{C}_{29}\text{H}_{28}\text{N}_6\text{O}_2$  ( $\text{M} + \text{Na}$ ): 547.2070, Found: 547.2076; **HPLC conditions**: Chiralcel IC column, 254 nm, flow rate: 1 ml/min, *i*-PrOH/hexanes = 20/80,  $t_{\text{major}} = 18.5$  min,  $t_{\text{minor}} = 24.0$  min; 96% ee.

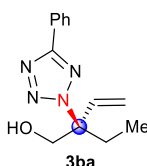

**(R)-2-ethyl-2-(5-phenyl-2H-tetrazol-2-yl)but-3-en-1-ol (3ba)** was prepared according to the general procedure from **1b** and **2a**. The crude product was purified by flash column chromatography (Petroleum ether/EtOAc = 20:1) on silica gel to provide the title compound as a colorless oil in 76% yield (37.1 mg).  $[\alpha]_{\text{D}}^{25} = 59.6$  ( $c = 0.24$ ,  $\text{CHCl}_3$ );  $^1\text{H}$  NMR (400 MHz,  $\text{CDCl}_3$ )  $\delta$  8.17–8.14 (m, 2H), 7.53–7.45 (m, 3H) 6.28 (dd,  $J = 10.8, 17.4$  Hz, 1H), 5.44 (d,  $J = 10.8$  Hz, 1H), 5.16 (d,  $J = 17.6$  Hz, 1H), 4.25 (t,  $J = 13.6$  Hz, 2H), 2.96 (brs, 1H), 2.39–2.26 (m, 2H), 0.93 (t,  $J = 7.4$  Hz, 3H);  $^{13}\text{C}$  NMR (100 MHz,  $\text{CDCl}_3$ )  $\delta$  164.5, 135.8, 130.4, 128.9, 127.2, 126.9, 117.6, 74.2, 66.1, 18.4, 8.0; **HRMS (ESI-MS)**: Calcd. for  $\text{C}_{13}\text{H}_{16}\text{N}_4\text{O}$  ( $\text{M} + \text{Na}$ ): 267.1222, Found: 267.1219; **HPLC conditions**: Chiralcel IC column, 254 nm, flow rate: 1 ml/min, *i*-PrOH/hexanes = 10/90,  $t_{\text{major}} = 12.2$  min,  $t_{\text{minor}} = 15.8$  min; 90% ee.

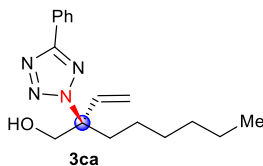

**(R)-2-(5-phenyl-2H-tetrazol-2-yl)-2-vinyloctan-1-ol (3ca)** was prepared according to the general procedure from **1c** and **2a**. The crude product was purified by flash column chromatography (Petroleum ether/EtOAc = 20:1) on silica gel to provide the title compound as a colorless oil in 84% yield (50.5 mg).  $[\alpha]_{\text{D}}^{25} = 52.4$  ( $c = 0.13$ ,  $\text{CHCl}_3$ );  $^1\text{H}$  NMR (400 MHz,  $\text{CDCl}_3$ )  $\delta$  8.17–8.14 (m, 2H), 7.52–7.47 (m, 3H) 6.29 (dd,  $J = 10.8, 17.4$  Hz, 1H), 5.42 (d,  $J = 10.8$  Hz, 1H), 5.11 (d,  $J = 17.6$  Hz, 1H), 4.28–4.19 (m, 2H), 3.00 (brt, 1H), 2.27–2.23 (m, 2H), 1.30–1.19 (m, 8H), 0.93 (t,  $J = 6.5$  Hz, 3H);  $^{13}\text{C}$  NMR (100 MHz,

CDCl<sub>3</sub>)  $\delta$  164.4, 136.2, 130.4, 128.9, 127.2, 126.9, 117.4, 73.9, 66.4, 36.0, 31.4, 29.3, 23.3, 22.5, 14.0; **HRMS (ESI-MS)**: Calcd. for C<sub>17</sub>H<sub>24</sub>N<sub>4</sub>O (M + Na): 323.1848, Found: 323.1842; **HPLC conditions**: Chiralcel IC column, 254 nm, flow rate: 1 ml/min, *i*-PrOH/hexanes = 10/90,  $t_{\text{major}}$  = 11.2 min,  $t_{\text{minor}}$  = 14.1 min; 90% ee.

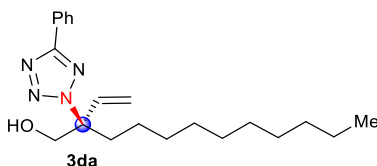

**(R)-2-(5-phenyl-2H-tetrazol-2-yl)-2-vinyloctan-1-ol (3da)** was prepared according to the general procedure from **1d** and **2a**. The crude product was purified by flash column chromatography (Petroleum ether/EtOAc = 20:1) on silica gel to provide the title compound as a colorless oil in 87% yield (62.0 mg).  $[\alpha]_{\text{D}}^{25}$  = 42.1 ( $c$  = 0.23, CHCl<sub>3</sub>); **<sup>1</sup>H NMR** (400 MHz, CDCl<sub>3</sub>)  $\delta$  8.18–8.15 (m, 2H), 7.52–7.47 (m, 3H) 6.29 (dd,  $J$  = 10.8, 17.4 Hz, 1H), 5.42 (d,  $J$  = 10.8 Hz, 1H), 5.12 (d,  $J$  = 17.6 Hz, 1H), 4.28–4.19 (m, 2H), 2.91 (brt, 1H), 2.27–2.22 (m, 2H), 1.29–1.2 (m, 16H), 0.87 (t,  $J$  = 6.6 Hz, 3H); **<sup>13</sup>C NMR** (100 MHz, CDCl<sub>3</sub>)  $\delta$  164.5, 136.2, 130.4, 128.9, 127.3, 126.9, 117.4, 73.9, 66.4, 36.1, 31.9, 29.7, 29.5, 29.4, 29.3, 23.3, 22.6, 14.1; **HRMS (ESI-MS)**: Calcd. for C<sub>21</sub>H<sub>32</sub>N<sub>4</sub>O (M + Na): 379.2474, Found: 379.2469; **HPLC conditions**: Chiralcel IC column, 254 nm, flow rate: 1 ml/min, *i*-PrOH/hexanes = 10/90,  $t_{\text{major}}$  = 17.4 min,  $t_{\text{minor}}$  = 21.6 min; 96% ee.

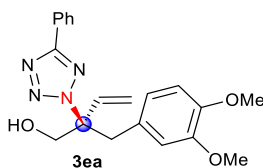

**(R)-2-(3,4-dimethoxybenzyl)-2-(5-phenyl-2H-tetrazol-2-yl)but-3-en-1-ol (3ea)** was prepared according to the general procedure from **1e** and **2a**. The crude product was purified by flash column chromatography (Petroleum ether/EtOAc = 20:1) on silica gel to provide the title compound as a colorless oil in 72% yield (52.8 mg).  $[\alpha]_{\text{D}}^{25}$  = 28.7 ( $c$  = 0.86, CHCl<sub>3</sub>); **<sup>1</sup>H NMR** (400 MHz, CDCl<sub>3</sub>)  $\delta$  8.18–8.16 (m, 2H), 7.51–7.47 (m, 3H) 6.75 (d,  $J$  = 8.2 Hz, 1H), 6.70 (dd,  $J$  = 1.8, 8.2 Hz, 1H), 6.55 (d,  $J$  = 1.8 Hz, 1H), 6.22 (dd,  $J$  = 10.8, 17.4 Hz, 1H), 5.40 (d,  $J$  = 10.8 Hz, 1H), 5.02 (d,  $J$  = 17.6 Hz, 1H), 4.26–4.18 (m, 2H), 3.84 (s, 3H), 3.72 (s, 3H), 3.60 (d,  $J$  = 13.7 Hz, 1H), 3.50 (d,  $J$  = 13.7 Hz, 1H), 2.84 (brs, 1H); **<sup>13</sup>C NMR** (100 MHz, CDCl<sub>3</sub>)  $\delta$  164.5, 148.6, 148.2, 136.1, 132.4, 130.5, 128.9, 127.1, 126.5, 122.9, 117.6, 113.5, 110.9, 74.0, 64.7, 55.8, 55.7, 29.7; **HRMS (ESI-MS)**: Calcd. for C<sub>20</sub>H<sub>22</sub>N<sub>4</sub>O<sub>3</sub> (M + Na): 389.1590, Found:



389.1584; **HPLC conditions:** Chiralcel IC column, 254 nm, flow rate: 1 ml/min, *i*-PrOH/hexanes = 10/90,  $t_{\text{major}} = 13.4$  min,  $t_{\text{minor}} = 15.0$  min; 90% ee.

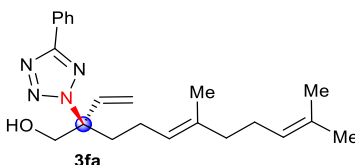

**(R,E)-6,10-dimethyl-2-(5-phenyl-2H-tetrazol-2-yl)-2-vinylundeca-5,9-dien-1-ol (3fa)** was prepared according to the general procedure from **1f** and **2a**. The crude product was purified by flash column chromatography (Petroleum ether/EtOAc = 20:1) on silica gel to provide the title compound as a colorless oil in 88% yield (64.5 mg).  $[\alpha]_{\text{D}}^{25} = 59.5$  ( $c = 0.84$ ,  $\text{CHCl}_3$ );  **$^1\text{H NMR}$**  (400 MHz,  $\text{CDCl}_3$ )  $\delta$  8.18–8.14 (m, 2H), 7.55–7.46 (m, 3H) 6.32 (dd,  $J = 10.8, 17.4$  Hz, 1H), 5.44 (d,  $J = 10.8$  Hz, 1H), 5.14 (d,  $J = 17.6$  Hz, 1H), 5.09–5.02 (m, 2H), 4.31–4.19 (m, 2H), 2.88 (brt, 1H), 2.31–2.24 (m, 2H), 2.06–1.92 (m, 6H), 1.65 (s, 3H), 1.62 (s, 3H), 1.55 (s, 3H);  **$^{13}\text{C NMR}$**  (100 MHz,  $\text{CDCl}_3$ )  $\delta$  164.5, 136.6, 136.1, 131.5, 130.4, 128.9, 127.2, 126.9, 124.1, 122.4, 117.5, 73.8, 66.5, 36.0, 31.9, 29.7, 26.5, 22.1, 17.7, 16.0; **HRMS (ESI-MS):** Calcd. for  $\text{C}_{22}\text{H}_{30}\text{N}_4\text{O}$  ( $\text{M} + \text{Na}$ ): 389.2317, Found: 389.2322; **HPLC conditions:** Chiralcel OD-H column, 254 nm, flow rate: 1 ml/min, *i*-PrOH/hexanes = 10/90,  $t_{\text{major}} = 10.5$  min,  $t_{\text{minor}} = 12.8$  min; 94% ee.

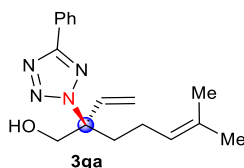

**(R)-6-methyl-2-(5-phenyl-2H-tetrazol-2-yl)-2-vinylhept-5-en-1-ol (3ga)** was prepared according to the general procedure from **1g** and **2a**. The crude product was purified by flash column chromatography (Petroleum ether/EtOAc = 20:1) on silica gel to provide the title compound as a colorless oil in 93% yield (55.5 mg).  $[\alpha]_{\text{D}}^{25} = 63.9$  ( $c = 0.14$ ,  $\text{CHCl}_3$ );  **$^1\text{H NMR}$**  (400 MHz,  $\text{CDCl}_3$ )  $\delta$  8.19–8.17 (m, 2H), 7.54–7.47 (m, 3H), 6.34 (dd,  $J = 10.8, 17.4$  Hz, 1H), 5.46 (d,  $J = 10.8$  Hz, 1H), 5.16 (d,  $J = 17.6$  Hz, 1H), 5.07 (t,  $J = 7.01$  Hz, 1H), 4.32–4.22 (m, 2H), 2.93 (brt, 1H), 2.32–2.28 (m, 2H), 2.04–1.98 (m, 2H), 1.66 (s, 3H), 1.57 (s, 3H);  **$^{13}\text{C NMR}$**  (100 MHz,  $\text{CDCl}_3$ )  $\delta$  164.5, 136.0, 132.9, 130.4, 128.9, 127.2, 126.9, 122.5, 117.5, 73.8, 66.5, 36.0, 25.6, 22.2, 17.6; **HRMS (ESI-MS):** Calcd. for  $\text{C}_{17}\text{H}_{22}\text{N}_4\text{O}$  ( $\text{M} + \text{Na}$ ): 321.1691, Found: 316.2190; **HPLC conditions:** Chiralcel IC column, 254 nm, flow rate: 1 ml/min, *i*-PrOH/hexanes = 10/90,  $t_{\text{minor}} = 13.8$  min,  $t_{\text{major}} = 15.0$  min; 94% ee.

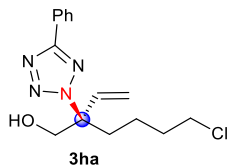

**(R)-6-chloro-2-(5-phenyl-2H-tetrazol-2-yl)-2-vinylhexan-1-ol (3ha)** was prepared according to the general procedure from **1h** and **2a**. The crude product was purified by flash column chromatography (Petroleum ether/EtOAc = 20:1) on silica gel to provide the title compound as a colorless oil in 85% yield (52.1 mg).  $[\alpha]_D^{25} = 32.2$  ( $c = 0.26$ ,  $\text{CHCl}_3$ );  $^1\text{H NMR}$  (400 MHz,  $\text{CDCl}_3$ )  $\delta$  8.17–8.13 (m, 2H), 7.52–7.48 (m, 3H), 6.28 (dd,  $J = 10.8, 17.4$  Hz, 1H), 5.44 (d,  $J = 10.8$  Hz, 1H), 5.12 (d,  $J = 17.6$  Hz, 1H), 4.30–4.20 (m, 2H), 3.55–3.51 (m, 2H), 2.98 (brs, 1H), 2.37–2.22 (m, 2H), 1.85–1.77 (m, 2H), 1.53–1.42 (m, 2H);  $^{13}\text{C NMR}$  (100 MHz,  $\text{CDCl}_3$ )  $\delta$  164.5, 135.8, 130.5, 128.9, 127.1, 126.7, 117.7, 73.7, 66.3, 44.3, 35.0, 32.4, 20.8; **HRMS (ESI-MS)**: Calcd. for  $\text{C}_{15}\text{H}_{19}\text{ClN}_4\text{O}$  ( $M + \text{Na}$ ): 329.1145, Found: 329.1144; **HPLC conditions**: Chiralcel IC column, 254 nm, flow rate: 1 ml/min,  $i$ -PrOH/hexanes = 10/90,  $t_{\text{major}} = 14.8$  min,  $t_{\text{minor}} = 18.6$  min; 87% ee.

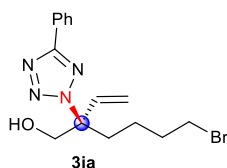

**(R)-6-bromo-2-(5-phenyl-2H-tetrazol-2-yl)-2-vinylhexan-1-ol (3ia)** was prepared according to the general procedure from **1i** and **2a**. The crude product was purified by flash column chromatography (Petroleum ether/EtOAc = 20:1) on silica gel to provide the title compound as a colorless oil in 83% yield (58.3 mg).  $[\alpha]_D^{25} = 42.9$  ( $c = 0.15$ ,  $\text{CHCl}_3$ );  $^1\text{H NMR}$  (400 MHz,  $\text{CDCl}_3$ )  $\delta$  8.16–8.13 (m, 2H), 7.51–7.47 (m, 3H), 6.28 (dd,  $J = 10.8, 17.4$  Hz, 1H), 5.43 (d,  $J = 10.8$  Hz, 1H), 5.12 (d,  $J = 17.6$  Hz, 1H), 4.28 (d,  $J = 12.2$  Hz, 1H), 4.22 (d,  $J = 12.2$  Hz, 1H), 3.54–3.37 (m, 2H), 3.05 (brs, 1H), 2.36–2.23 (m, 2H), 1.92–1.76 (m, 2H), 1.52–1.42 (m, 2H);  $^{13}\text{C NMR}$  (100 MHz,  $\text{CDCl}_3$ )  $\delta$  164.5, 135.8, 130.5, 128.9, 127.1, 126.7, 117.8, 73.6, 66.3, 34.8, 32.9, 32.5, 22.1; **HRMS (ESI-MS)**: Calcd. for  $\text{C}_{15}\text{H}_{19}\text{BrN}_4\text{O}$  ( $M + \text{Na}$ ): 373.0640, Found: 373.0645; **HPLC conditions**: Chiralcel IC column, 254 nm, flow rate: 1 ml/min,  $i$ -PrOH/hexanes = 15/85,  $t_{\text{major}} = 14.7$  min,  $t_{\text{minor}} = 19.0$  min; 90% ee.

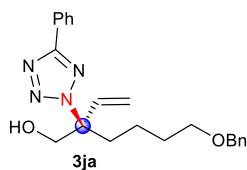

**(R)-6-bromo-2-(5-phenyl-2H-tetrazol-2-yl)-2-vinylhexan-1-ol (3ja)** was prepared according to the general procedure from **1j** and **2a**. The crude product was purified by flash column chromatography (Petroleum ether/EtOAc = 20:1) on silica gel to provide the title compound as a colorless oil in 91% yield (68.9 mg).  $[\alpha]_D^{25} = 65.3$  ( $c = 0.11$ ,  $\text{CHCl}_3$ );  $^1\text{H NMR}$  (400 MHz,  $\text{CDCl}_3$ )  $\delta$  8.17–8.13 (m, 2H), 7.49–7.47 (m, 3H), 7.36–7.27 (m, 5H), 6.27 (dd,  $J = 10.8, 17.4$  Hz, 1H), 5.42 (d,  $J = 10.8$  Hz, 1H), 5.13 (d,  $J = 17.6$  Hz, 1H), 4.48 (s, 2H), 4.24 (s, 2H), 3.50–3.46 (m, 2H), 3.10 (brs, 1H), 2.41–2.37 (m, 2H), 1.67–1.60 (m, 2H), 1.30–1.26 (m, 2H);  $^{13}\text{C NMR}$  (100 MHz,  $\text{CDCl}_3$ )  $\delta$  164.5, 138.1, 136.0, 130.4, 128.8, 128.4, 127.6, 127.2, 126.9, 117.6, 73.7, 72.9, 69.8, 66.3, 32.4, 23.8; **HRMS (ESI-MS)**: Calcd. for  $\text{C}_{22}\text{H}_{26}\text{N}_4\text{O}_2$  ( $M + \text{Na}$ ): 401.1953, Found: 401.1959; **HPLC conditions**: Chiralcel IC column, 254 nm, flow rate: 1 ml/min,  $i\text{-PrOH/hexanes} = 1/9$ ,  $t_{\text{major}} = 15.9$  min,  $t_{\text{minor}} = 21.1$  min; 97% ee.

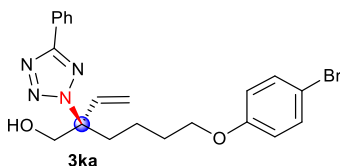

**(R)-6-(4-bromophenoxy)-2-(5-phenyl-2H-tetrazol-2-yl)-2-vinylhexan-1-ol (3ka)** was prepared according to the general procedure from **1k** and **2a**. The crude product was purified by flash column chromatography (Petroleum ether/EtOAc = 20:1) on silica gel to provide the title compound as a colorless oil in 89% yield (78.9 mg).  $[\alpha]_D^{25} = 67.3$  ( $c = 0.31$ ,  $\text{CHCl}_3$ );  $^1\text{H NMR}$  (400 MHz,  $\text{CDCl}_3$ )  $\delta$  8.15–8.13 (m, 2H), 7.52–7.47 (m, 3H), 7.35–7.31 (m, 2H), 6.75–6.70 (m, 2H), 6.29 (dd,  $J = 10.8, 17.4$  Hz, 1H), 5.43 (d,  $J = 10.8$  Hz, 1H), 5.12 (d,  $J = 17.6$  Hz, 1H), 4.26 (s, 2H), 3.93–3.88 (m, 2H), 2.96 (brt, 1H), 2.39–2.31 (m, 2H), 1.83–1.76 (m, 2H), 1.54–1.43 (m, 2H);  $^{13}\text{C NMR}$  (100 MHz,  $\text{CDCl}_3$ )  $\delta$  164.5, 157.9, 135.9, 132.2, 130.4, 128.9, 127.1, 126.9, 117.7, 116.2, 112.7, 73.8, 67.5, 66.4, 35.5, 29.1, 20.1; **HRMS (ESI-MS)**: Calcd. for  $\text{C}_{21}\text{H}_{23}\text{BrN}_4\text{O}_2$  ( $M + \text{Na}$ ): 465.0902, Found: 465.0907; **HPLC conditions**: Chiralcel IC column, 254 nm, flow rate: 1 ml/min,  $i\text{-PrOH/hexanes} = 10/90$ ,  $t_{\text{major}} = 16.2$  min,  $t_{\text{minor}} = 20.6$  min; 90% ee.

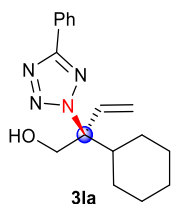

**(R)-2-cyclohexyl-2-(5-phenyl-2H-tetrazol-2-yl)but-3-en-1-ol (3la)** was prepared according to the general procedure from **1l** and **2a**. The crude product was purified by flash column chromatography (Petroleum ether/EtOAc = 20:1) on silica gel to provide the title compound as a colorless oil in 54% yield

(32.2 mg).  $[\alpha]_D^{25} = 20.7$  ( $c = 0.25$ ,  $\text{CHCl}_3$ );  **$^1\text{H NMR}$**  (400 MHz,  $\text{CDCl}_3$ )  $\delta$  8.19–8.14 (m, 2H), 7.53–7.48 (m, 3H), 6.46 (dd,  $J = 10.8, 17.4$  Hz, 1H), 5.50 (d,  $J = 10.8$  Hz, 1H), 5.21 (d,  $J = 17.6$  Hz, 1H), 4.44 (dd,  $J = 8.2, 12.4$  Hz, 1H), 4.19 (dd,  $J = 8.2, 12.4$  Hz, 1H), 2.97 (brt, 1H), 2.38 (t,  $J = 11.4$  Hz, 1H), 1.77–1.65 (m, 2H), 1.60–1.47 (m, 4H), 1.29–1.09 (m, 4H);  **$^{13}\text{C NMR}$**  (100 MHz,  $\text{CDCl}_3$ )  $\delta$  164.2, 134.4, 130.4, 128.9, 127.3, 126.9, 117.9, 64.2, 45.1, 27.4, 27.2, 26.4, 26.1; **HRMS (ESI-MS)**: Calcd. for  $\text{C}_{17}\text{H}_{22}\text{N}_4\text{O}$  ( $\text{M} + \text{Na}$ ): 321.1691, Found: 321.1690; **HPLC conditions**: Chiralcel IC column, 254 nm, flow rate: 1 ml/min,  $i$ -PrOH/hexanes = 15/85,  $t_{\text{major}} = 7.4$  min,  $t_{\text{minor}} = 8.5$  min; 89% ee.

### Scaled up procedure and X-ray crystallography of **3ad**

To an oven dried screw-cap reaction tube equipped with a magnetic stir bar,  $\text{Pd}_2(\text{dba})_3 \cdot \text{CHCl}_3$  (52.0 mg, 2.5 mol%), Trost's ligand (*R,R*)-**L6** (78.0 mg, 5 mol%), vinyl cyclic carbonate **1a** (256.25 mg, 2 mmol), and phenytetrazole **2a** (458.76 mg, 2.4 mmol) were added. The reaction tube was sealed with rubber-septum, then evacuated and backfilled with nitrogen. Anhydrous toluene (0.2 M, 10 mL) was added via syringe. The resulting mixture was stirred at 0 °C for 48 hours. The residue was purified by flash column chromatography on silica gel to afford the pure branched product **3ad** in 89% of isolated yield (0.45 g) and without any loss in enantioselectivity.

### X-ray crystallography of **3ad**

A single-crystal of **3ad** was obtained from dichloromethane/hexane solvent system at room temperature. Diffraction data were collected on a Bruker SMART Apex-II CCD-based X-ray diffractometer with  $\text{Cu-K}\alpha$  radiation. The empirical absorption correction was applied by using the SADABS program. The structure was solved using direct method, and refined by full-matrix least-squares on  $F^2$  (G.M. Sheldrick, SHELXTL2008, program of crystal structure refinement, University of Göttingen, Germany, 1997). H-atoms were refined isotopically, while all other atoms were refined anisotropically. The crystallographic data is summarized in Table F1 and the diagram is shown in Figure F1.

**Table F1.** Crystal data and structure refinement for **3ad**.

|                     |                                                  |
|---------------------|--------------------------------------------------|
| Identification code | A                                                |
| Empirical formula   | $\text{C}_{12}\text{H}_{13}\text{N}_5\text{O}_3$ |
| Formula weight      | 275.27                                           |
| Temperature/K       | 193.00                                           |

|                                   |                                                                                                                 |
|-----------------------------------|-----------------------------------------------------------------------------------------------------------------|
| Wavelength                        | 1.3414 Å                                                                                                        |
| Crystal system                    | Triclinic                                                                                                       |
| space group                       | P1                                                                                                              |
| Unit cell dimensions              | a = 7.1821(8) Å    alpha = 74 deg.<br>b = 7.4470(8) Å    beta = 75 deg.<br>c = 13.2850(15) Å    gamma = 83 deg. |
| Volume                            | 659.82(13) Å <sup>3</sup>                                                                                       |
| Z                                 | 2                                                                                                               |
| Calculated density                | 1.386 mg/m <sup>3</sup>                                                                                         |
| Absorption coefficient            | 0.552 mm <sup>-1</sup>                                                                                          |
| F(000)                            | 288                                                                                                             |
| Crystal size                      | 0.12 x 0.1 x 0.1mm <sup>3</sup>                                                                                 |
| Theta range for data collection   | 10.766 to 120.664 deg.                                                                                          |
| Index range                       | -9 ≤ h ≤ 9, -9 ≤ k ≤ 9, -16 ≤ l ≤ 17                                                                            |
| Reflections collected             | 8286                                                                                                            |
| Independent reflections           | 4465 [R <sub>int</sub> = 0.0437, R <sub>sigma</sub> = 0.0569]                                                   |
| Completeness to theta             | 1.48/0.74                                                                                                       |
| Theta (max)                       | 60.332                                                                                                          |
| Absorption correction             | MULTI-SCAN                                                                                                      |
| Radiation                         | GaKa (g = 1.34139)                                                                                              |
| Refinement method                 | Full-matrix least-squares on F <sup>2</sup>                                                                     |
| Data / restraints / parameters    | 4465 / 3 / 365                                                                                                  |
| Goodness-of-fit on F <sup>2</sup> | 1.103                                                                                                           |
| Final R indices [I > 2sigma(I)]   | R <sub>1</sub> = 0.0650, wR <sub>2</sub> = 0.2021                                                               |
| R indices (all data)              | R <sub>1</sub> = 0.0737, wR <sub>2</sub> = 0.2087                                                               |
| Absolute structure parameter      | 0.3(4)                                                                                                          |
| Largest diff. peak and hole       | 0.33/-0.26 e.Å <sup>-3</sup>                                                                                    |

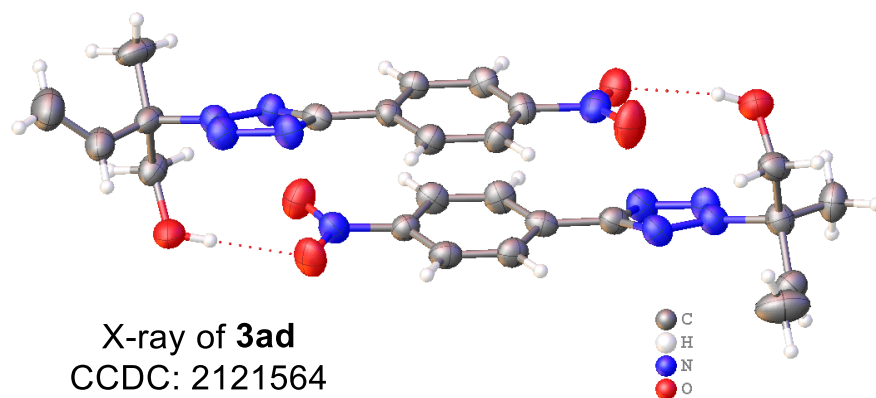

**Figure F1.** X-ray of **3ad**.

**References:**

1. A. Khan, H. Zhao, M. Zhang, S. Khan, D. Zhao, *Angew. Chem. Int. Ed.* **2020**, *59*, 1340-1345.

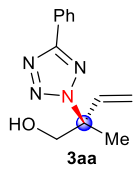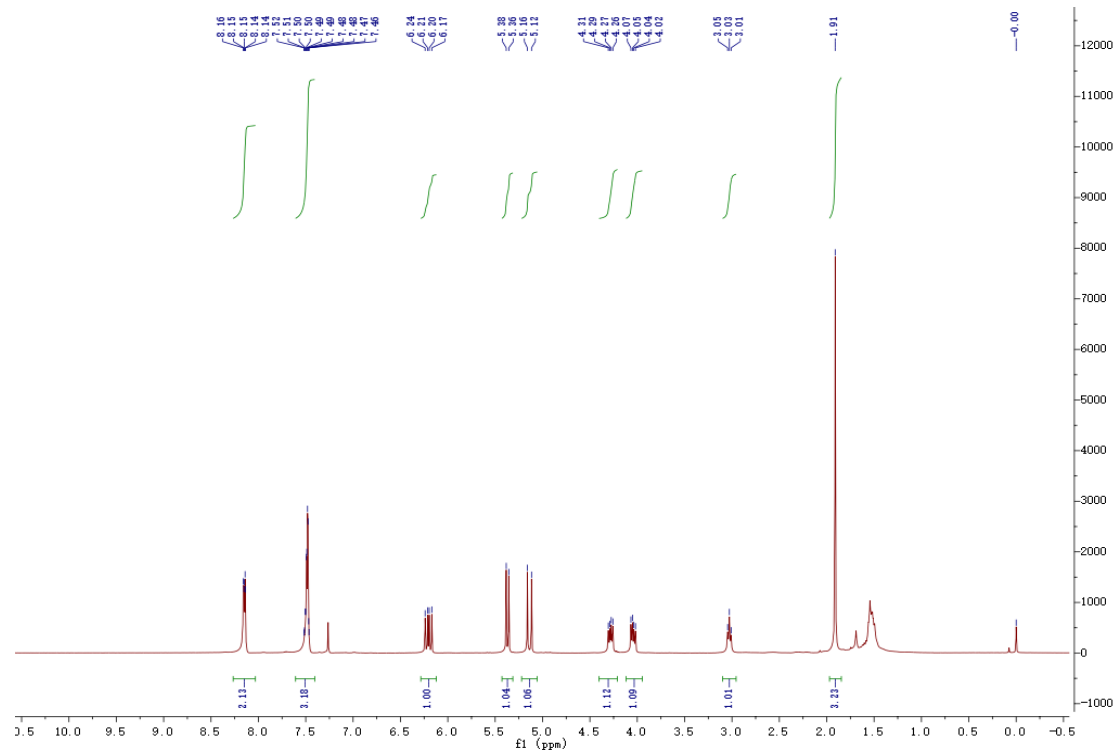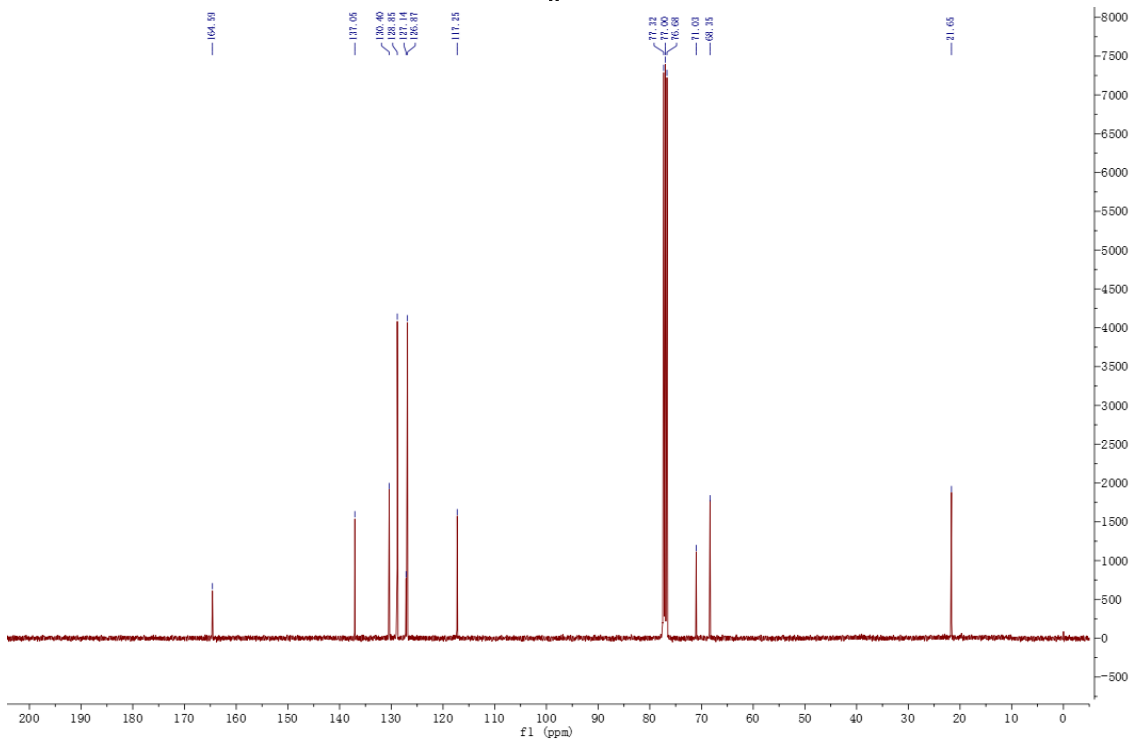

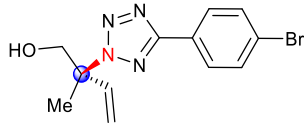

**3ab**

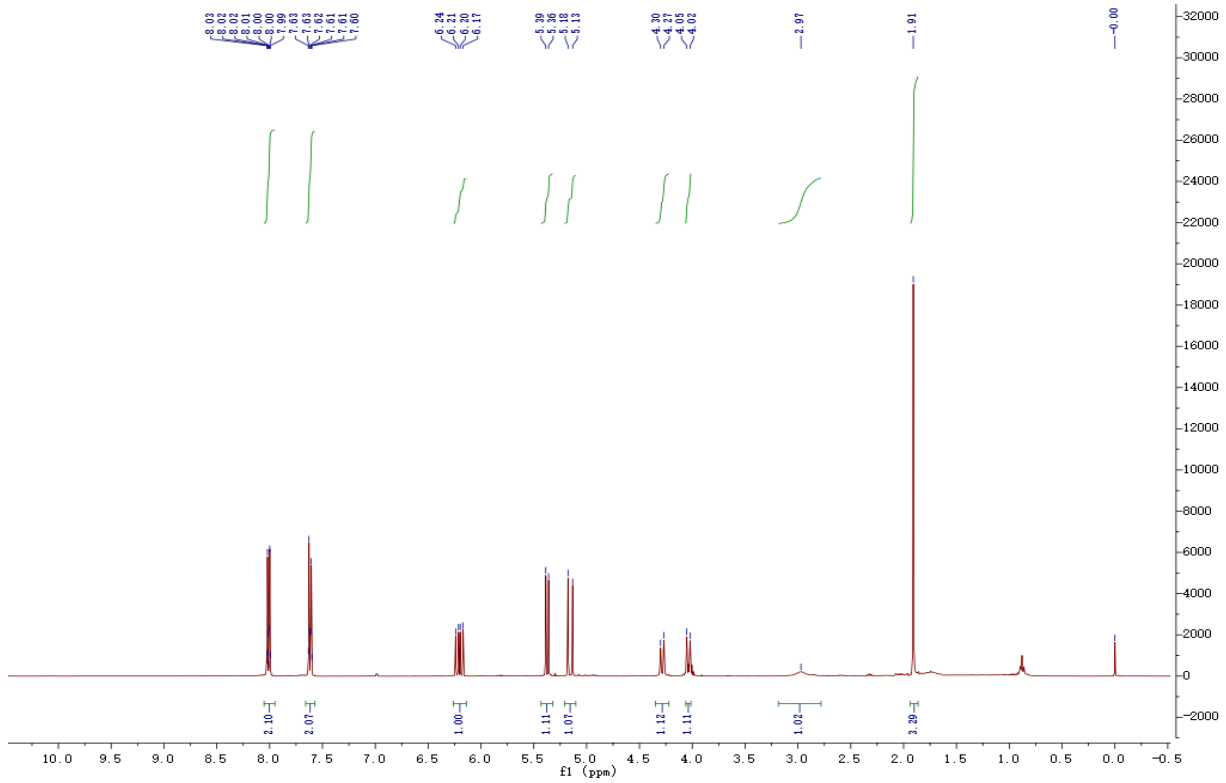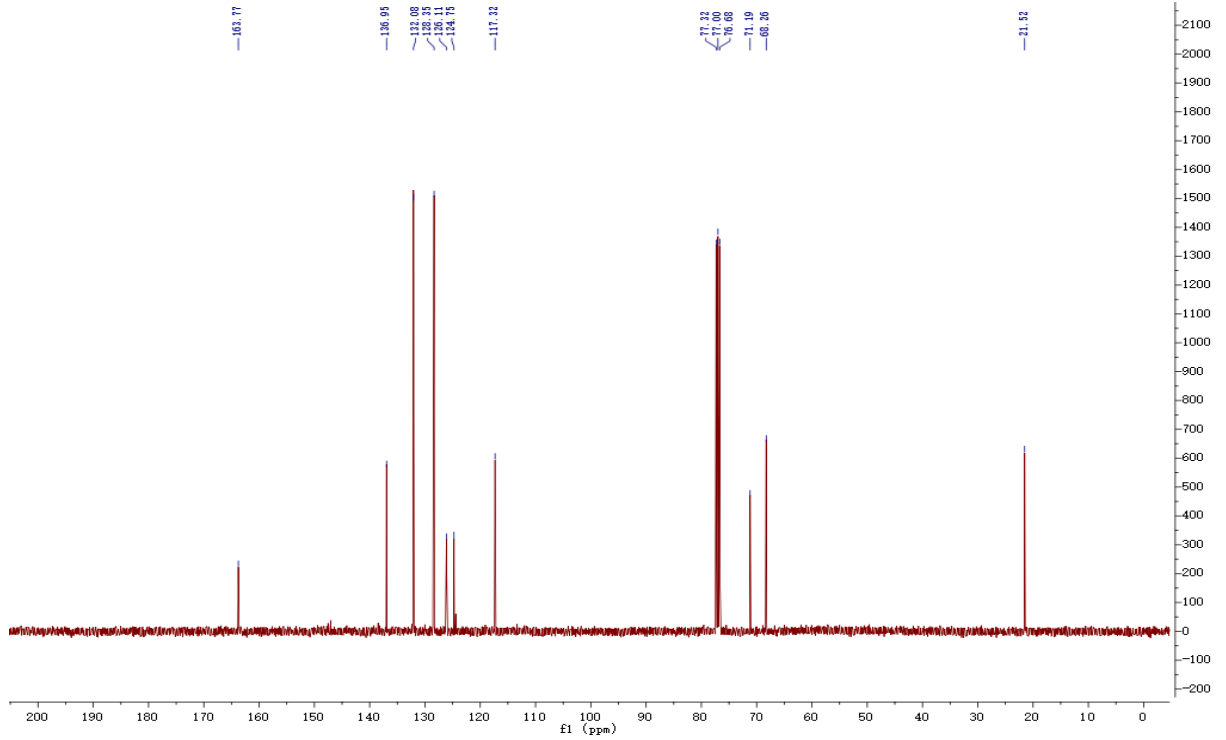



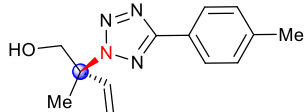

3ac

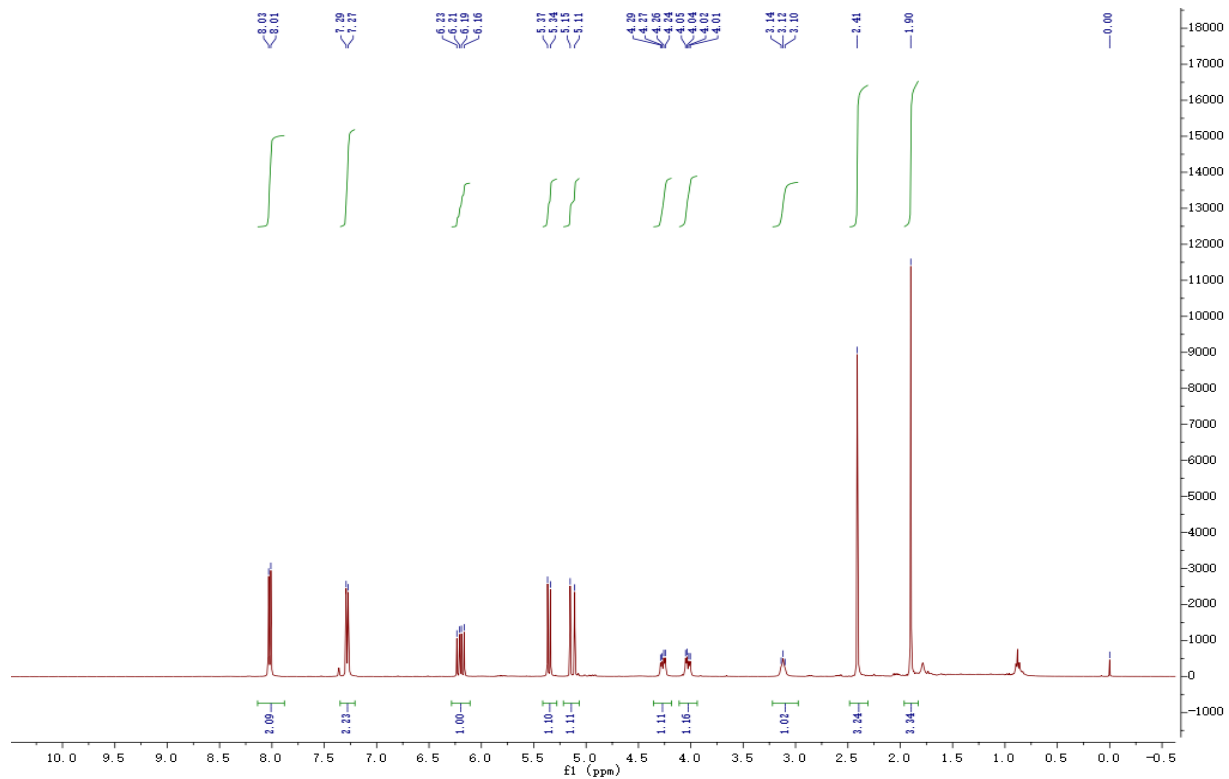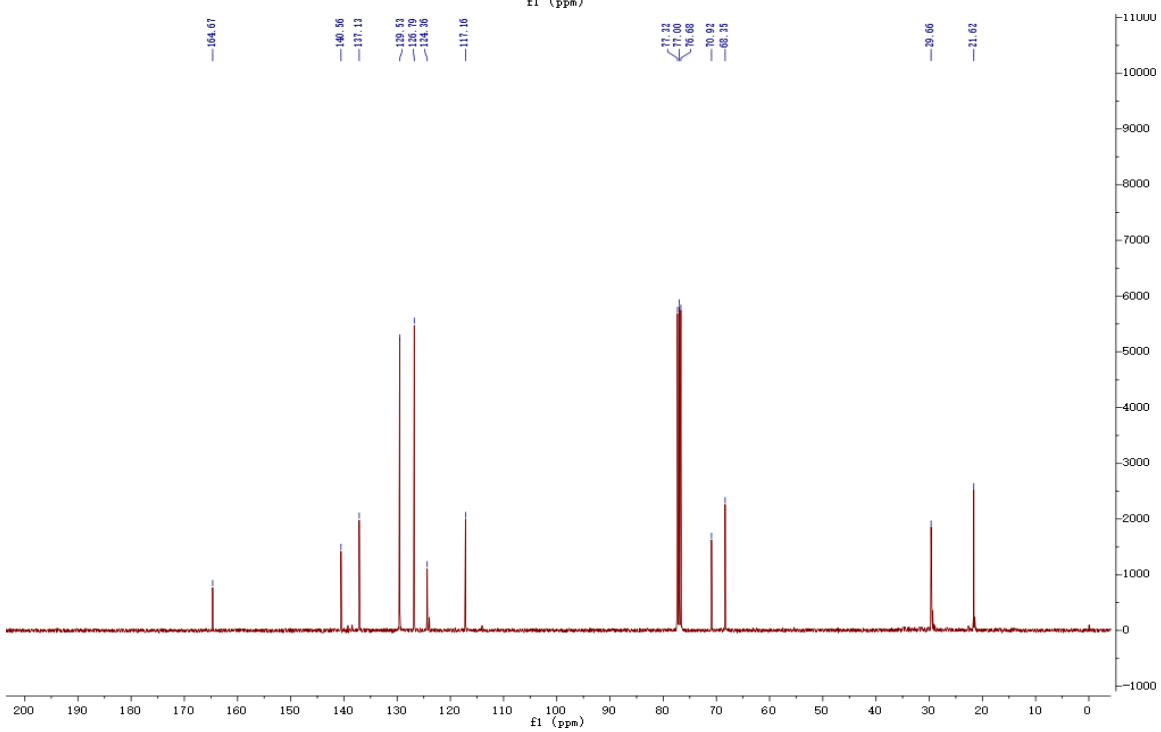

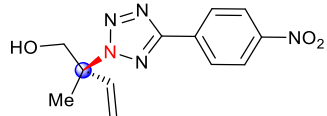

3ad

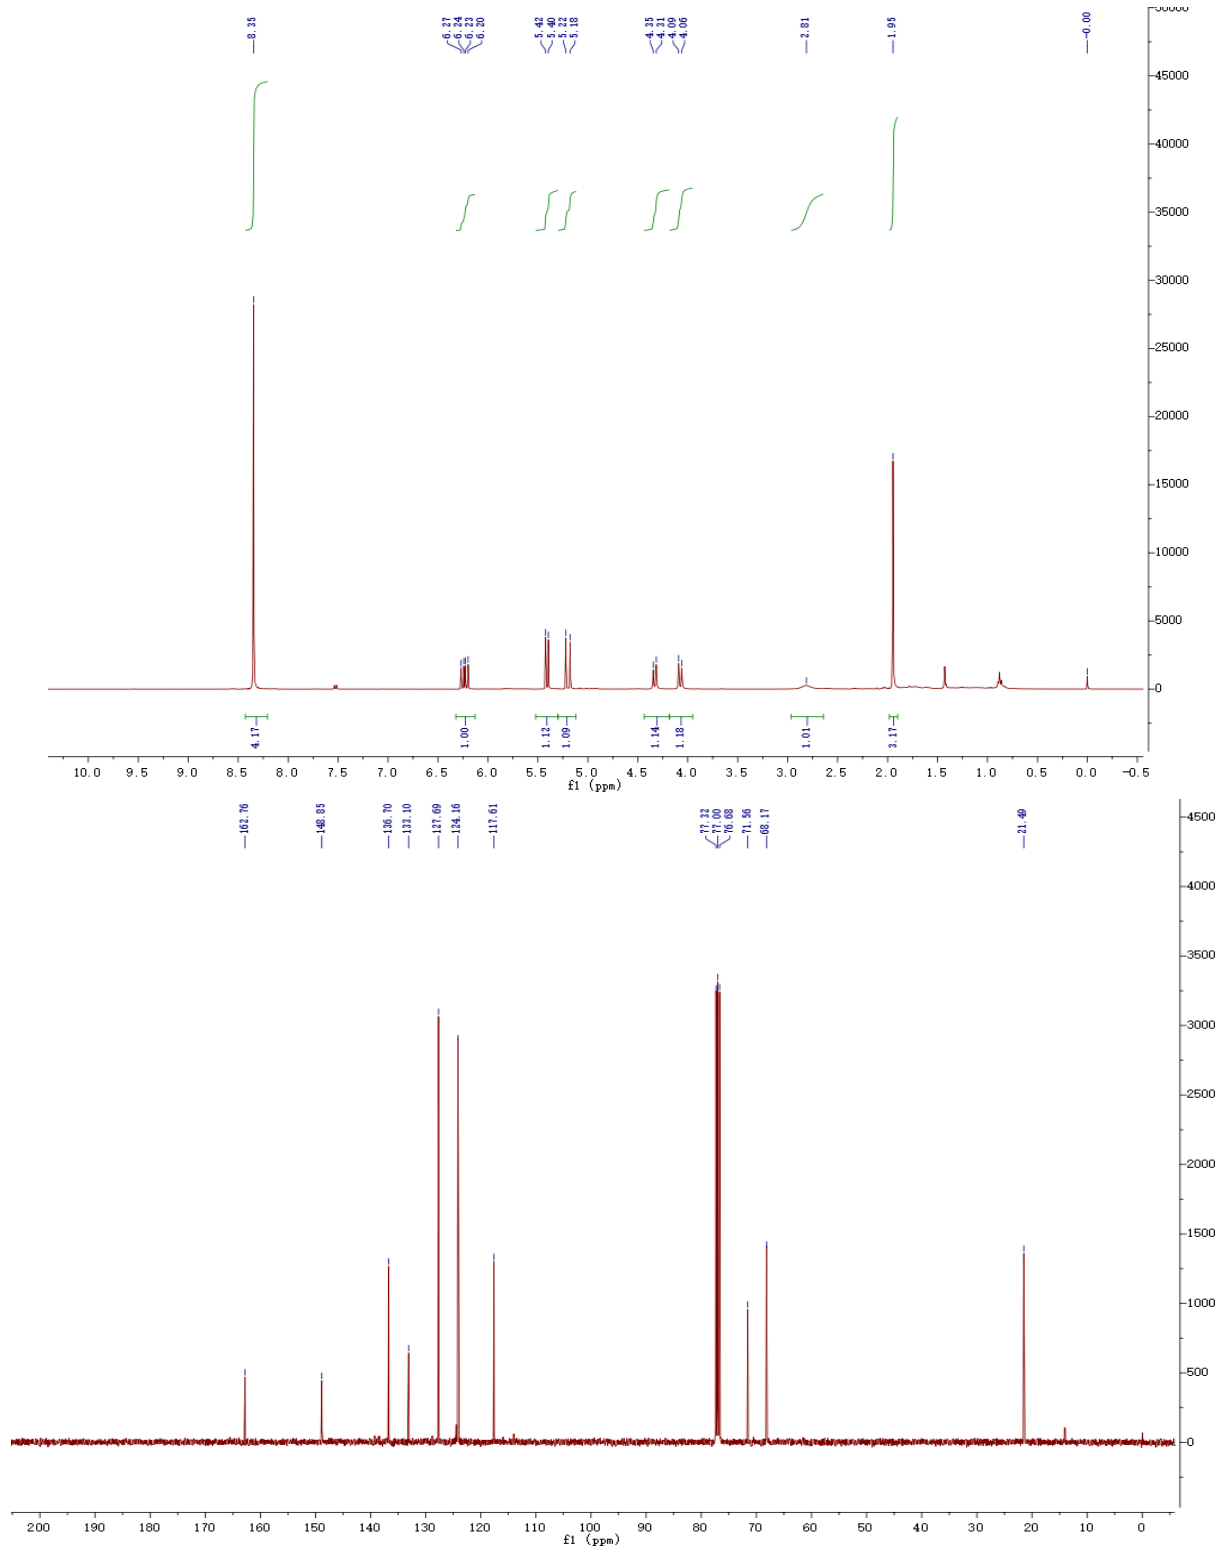

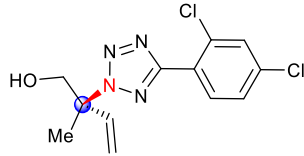

3ae

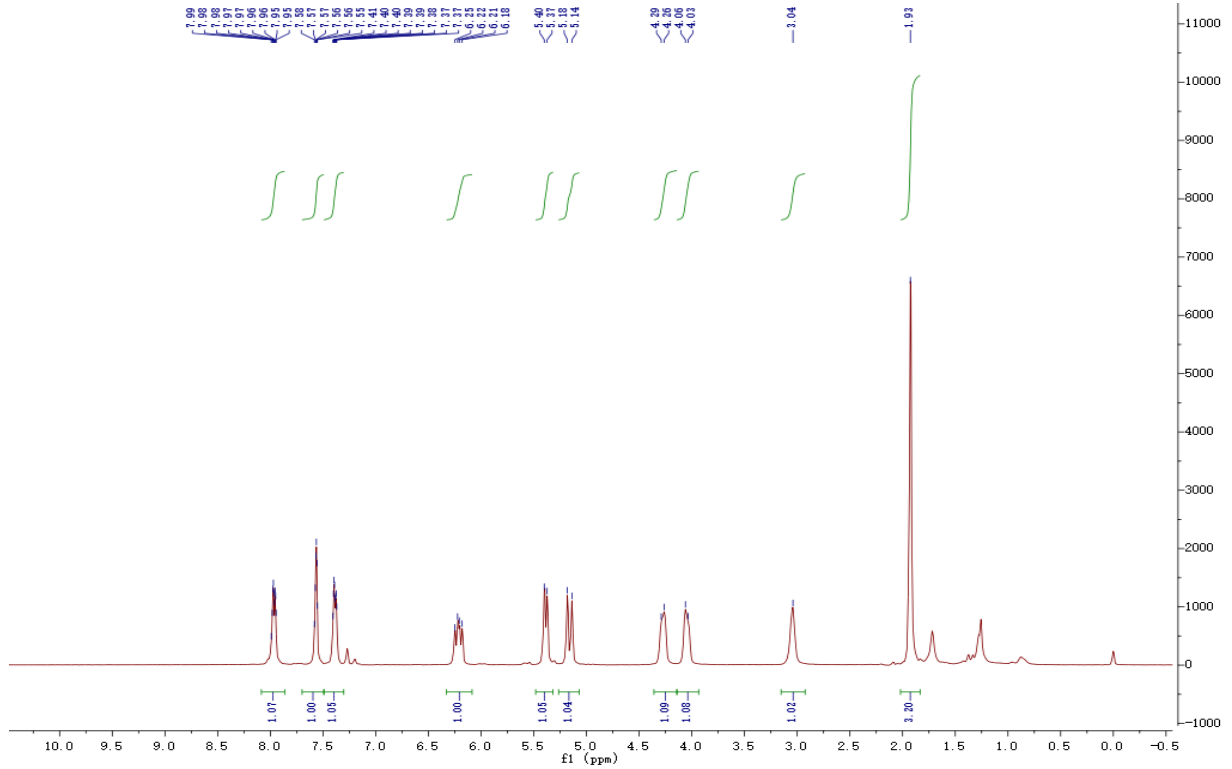

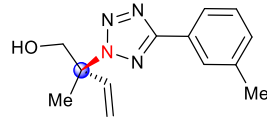

3af

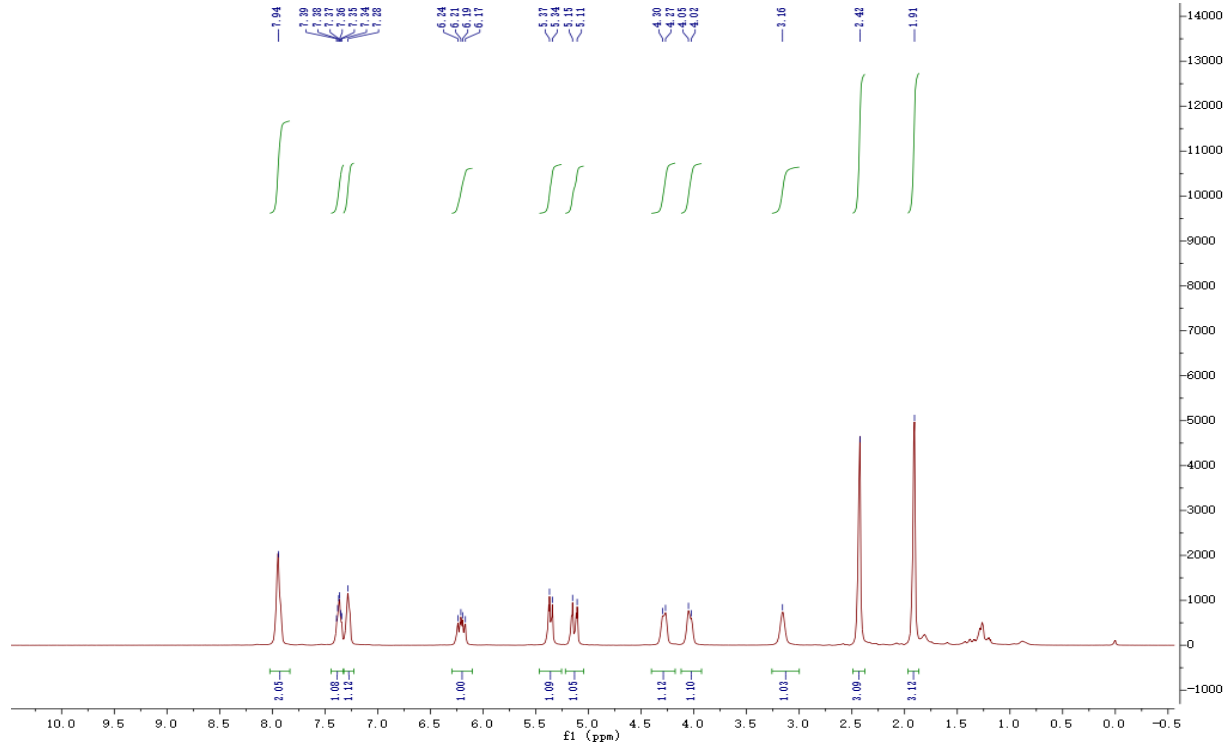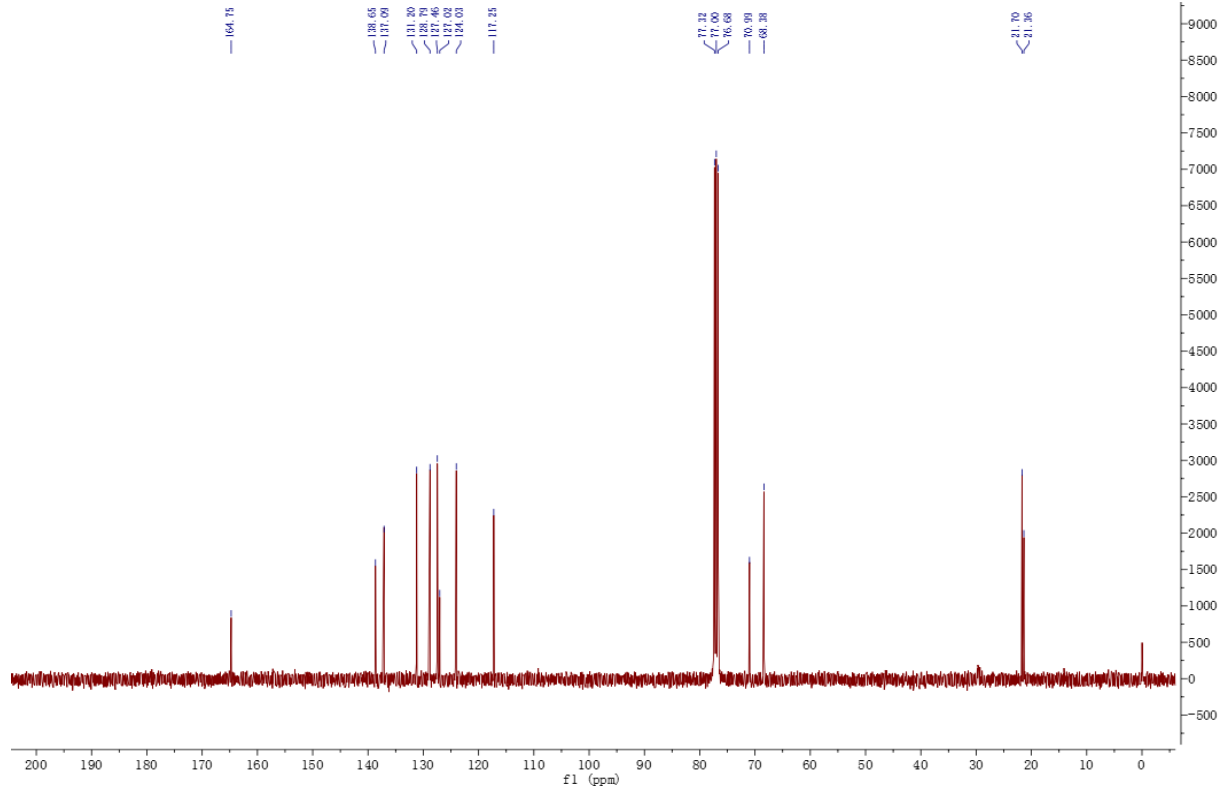

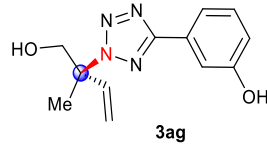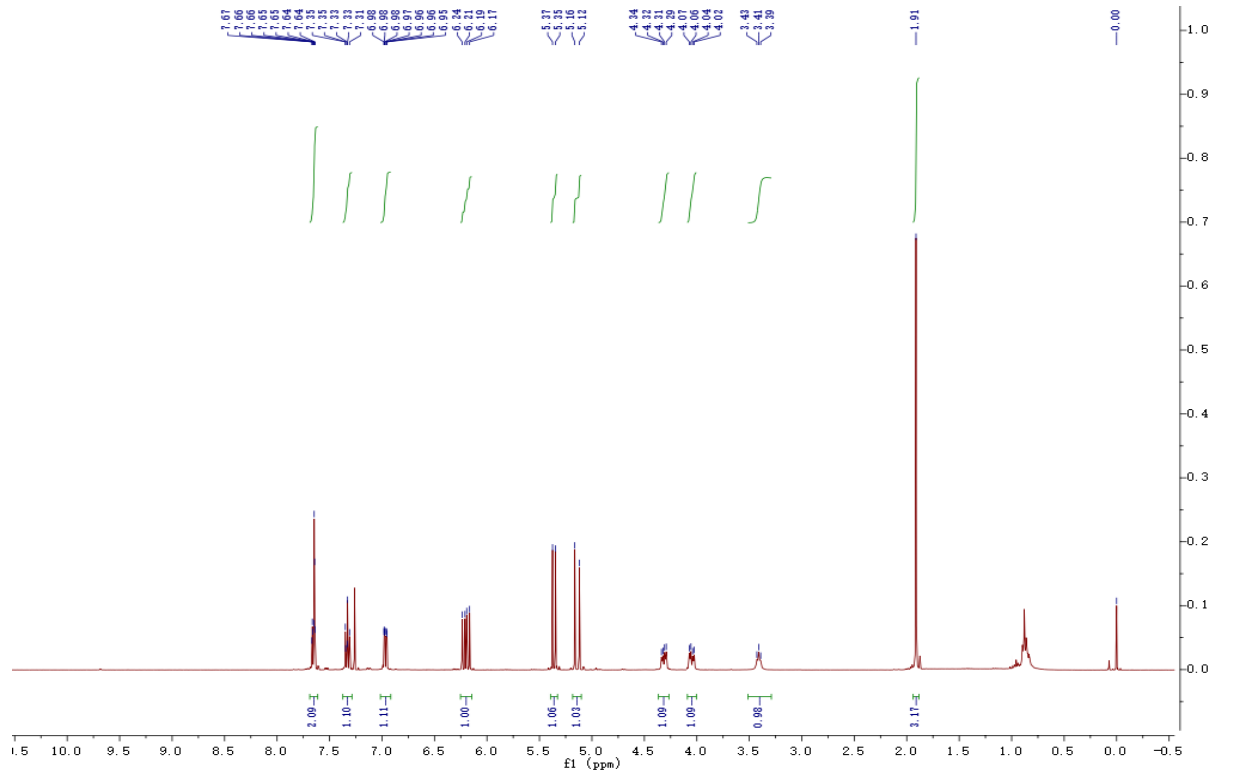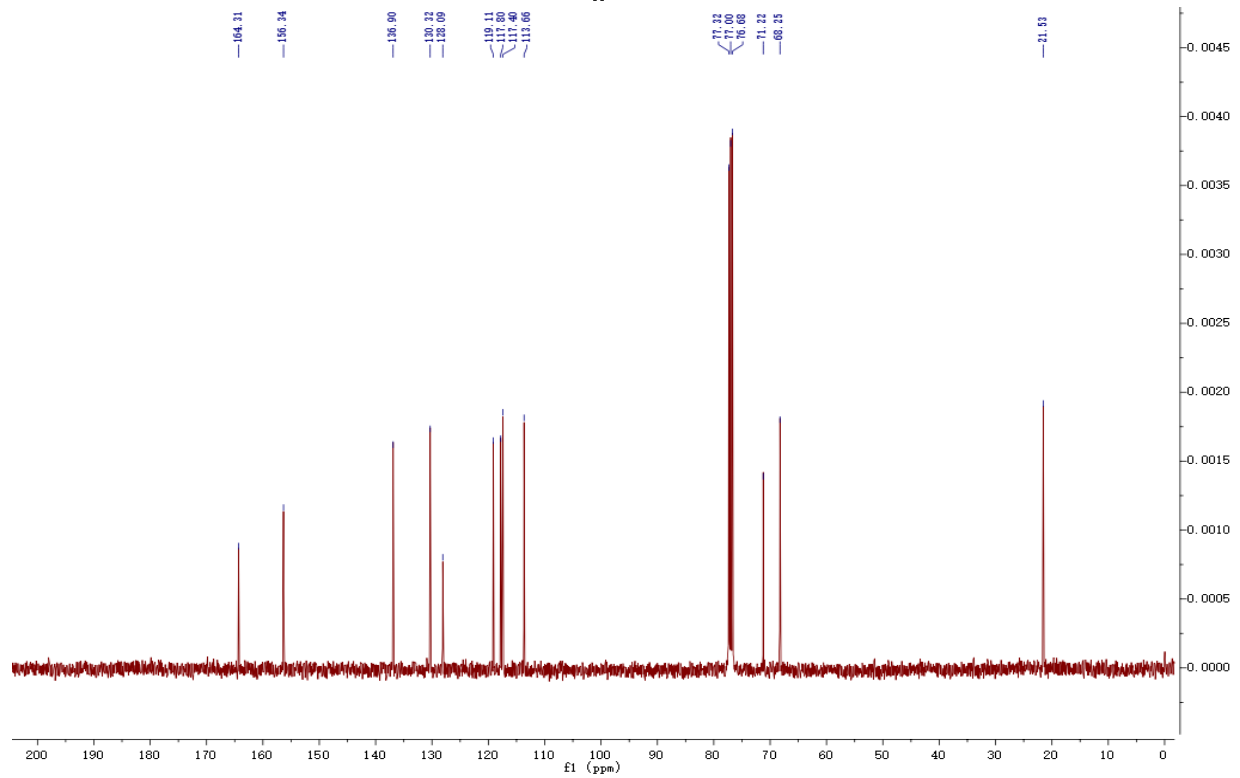



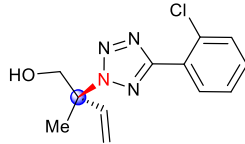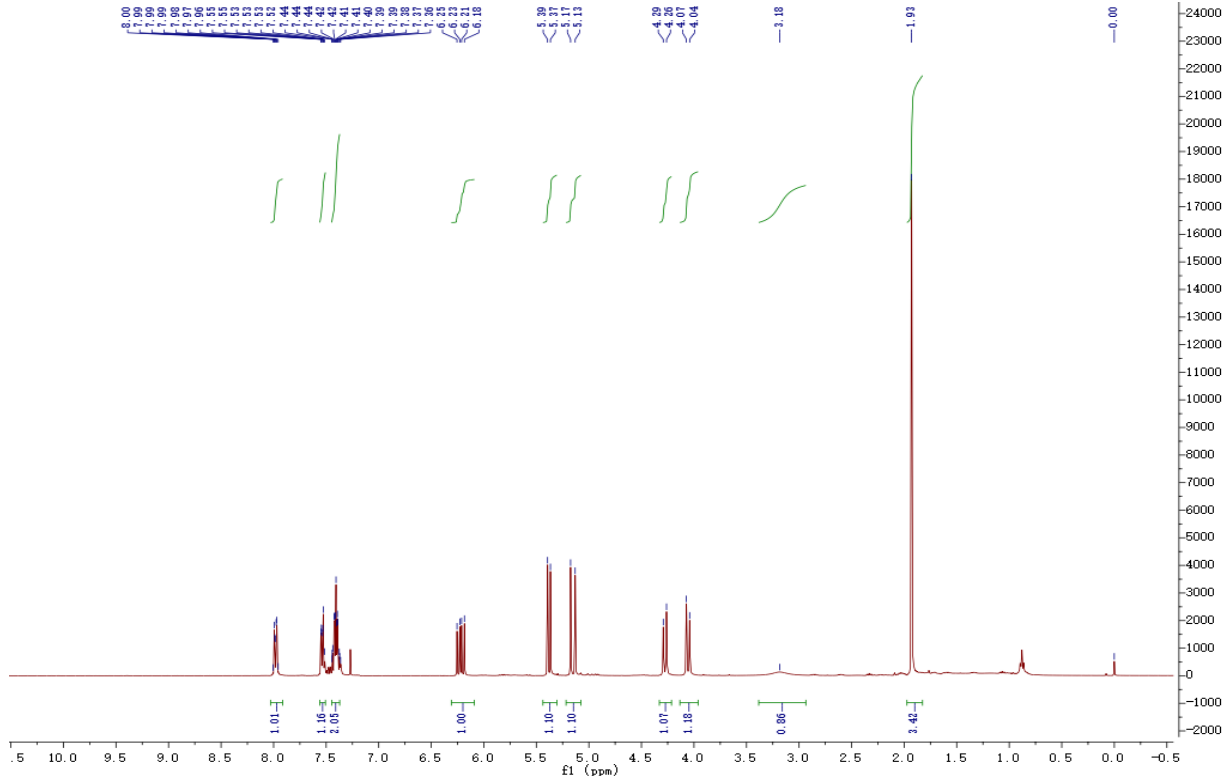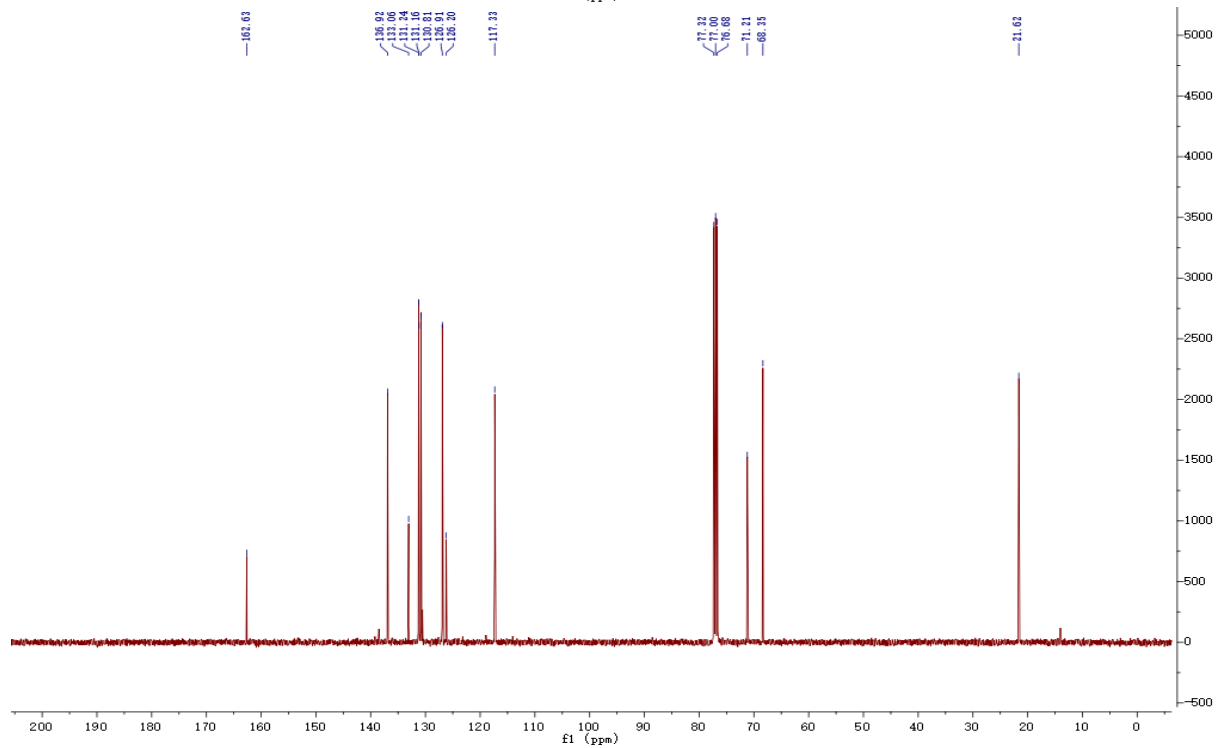





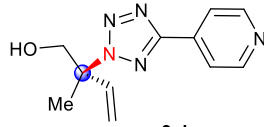

3ak

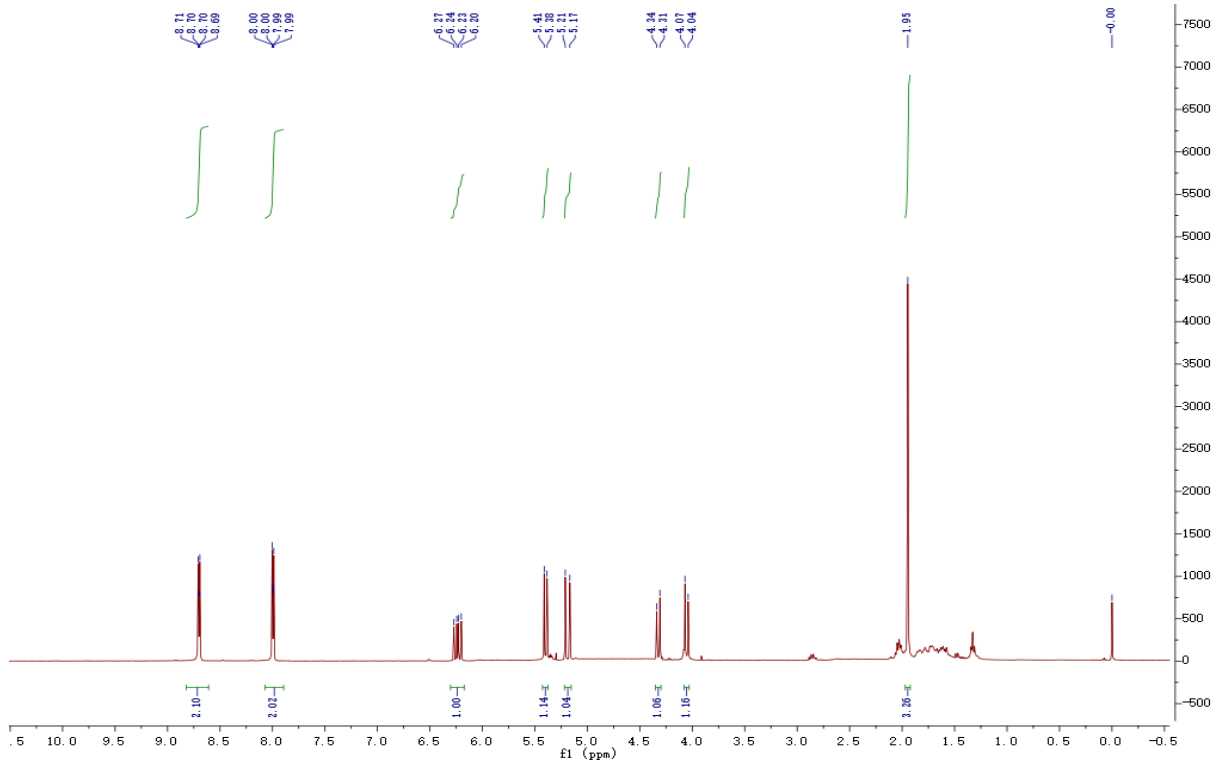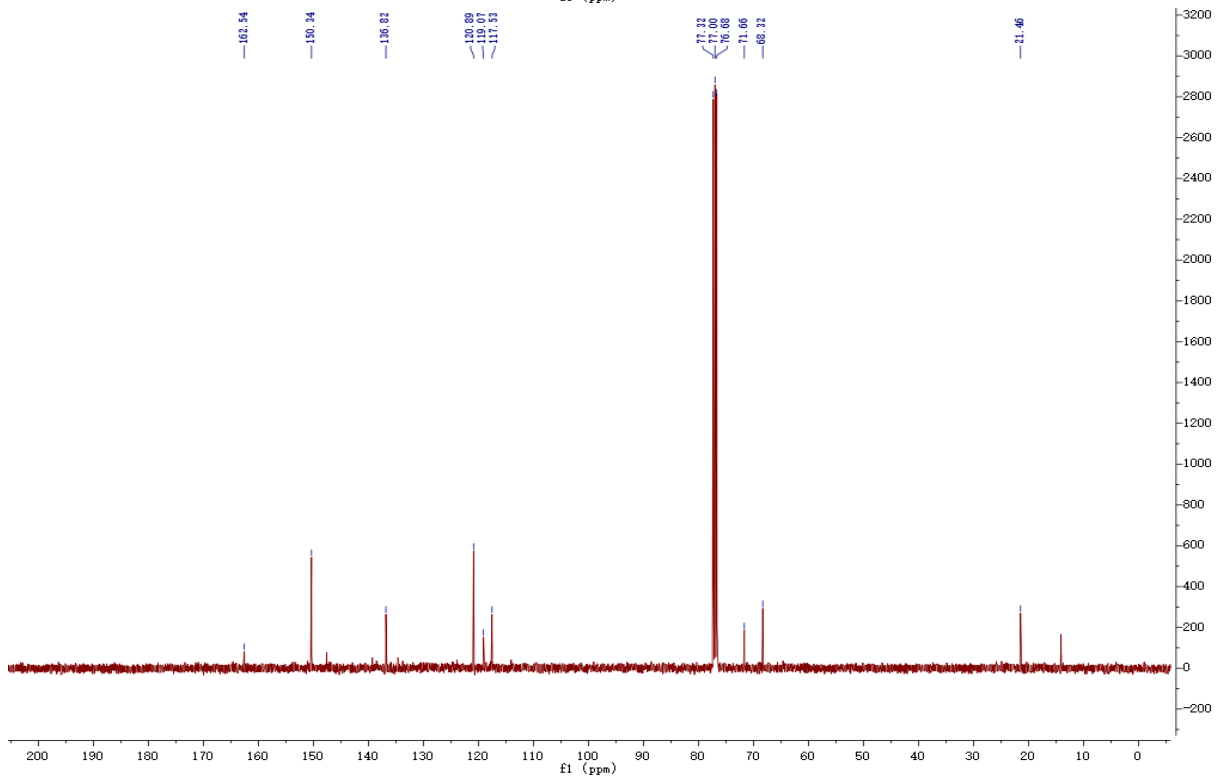

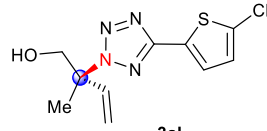

3al

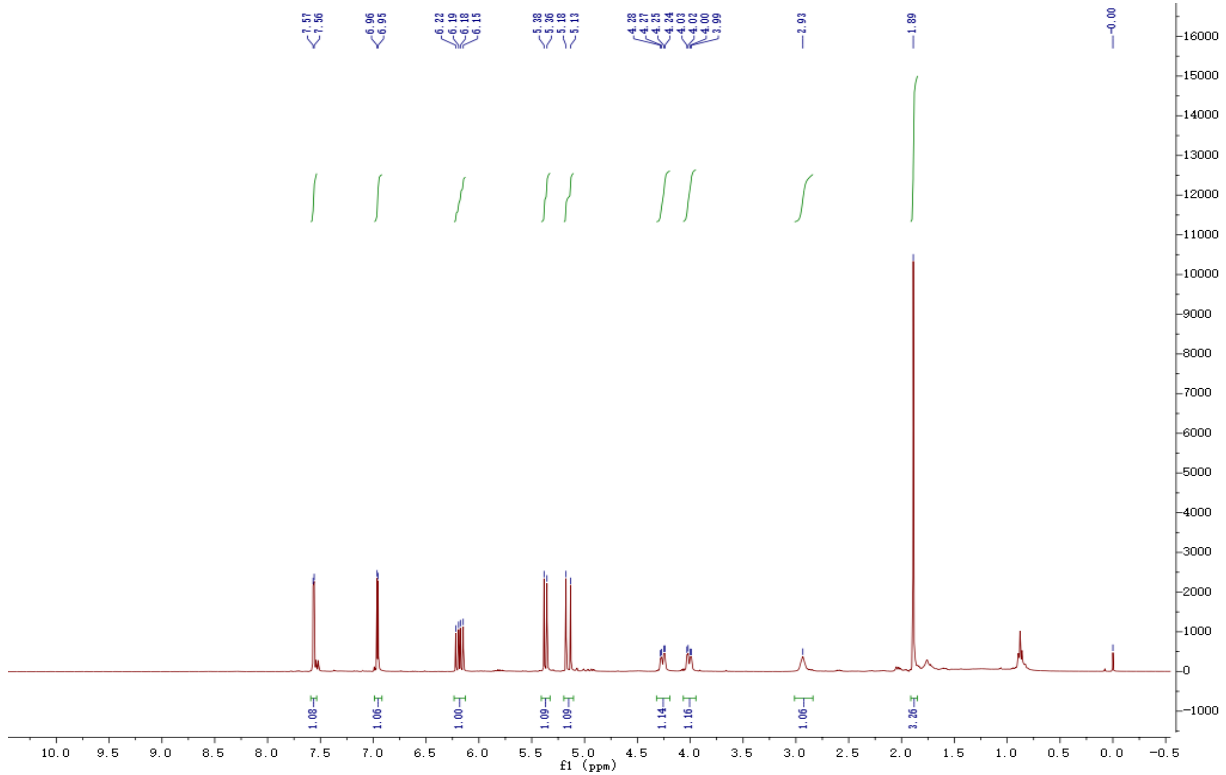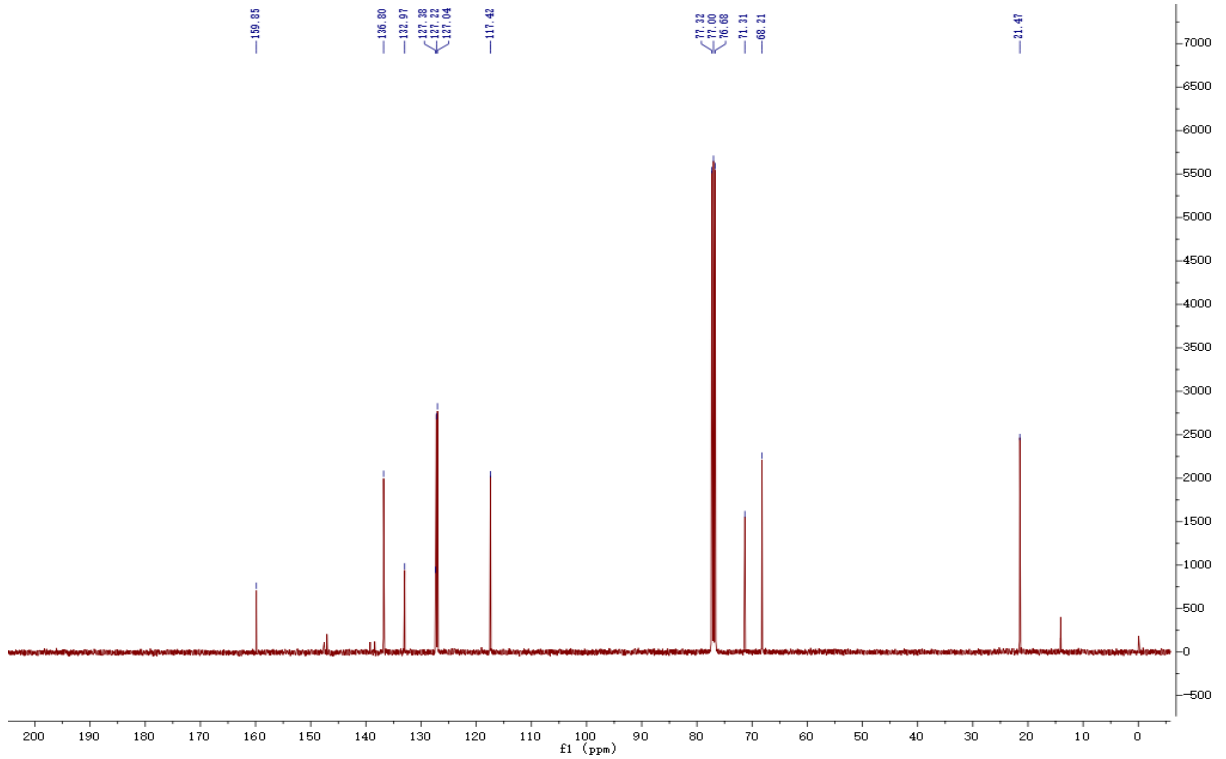

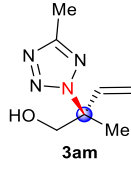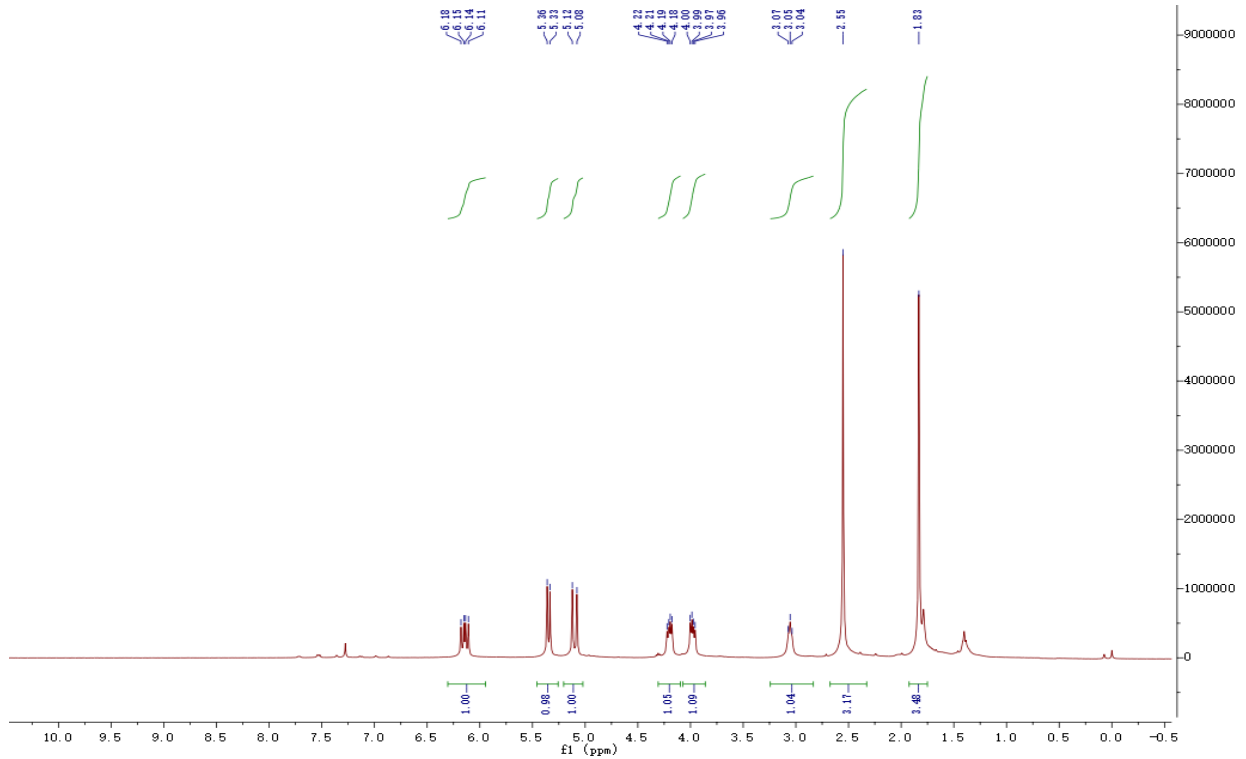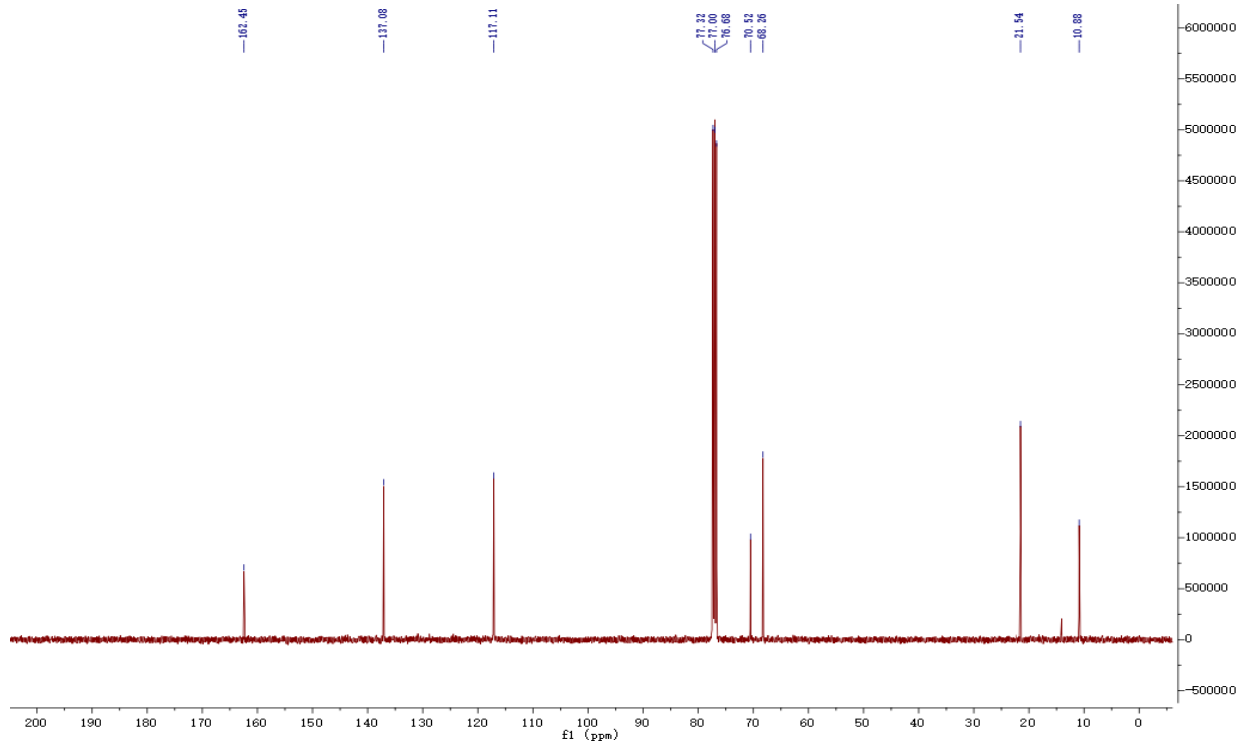

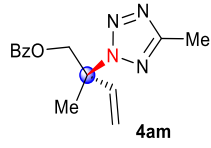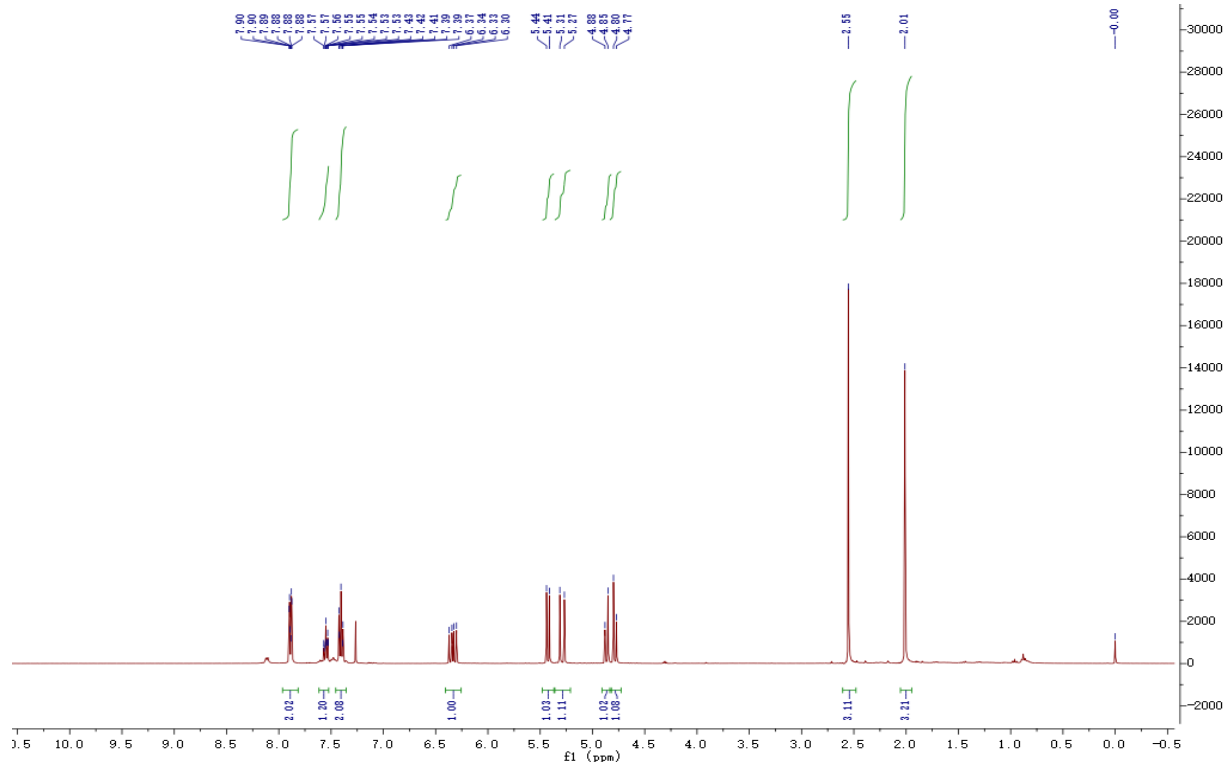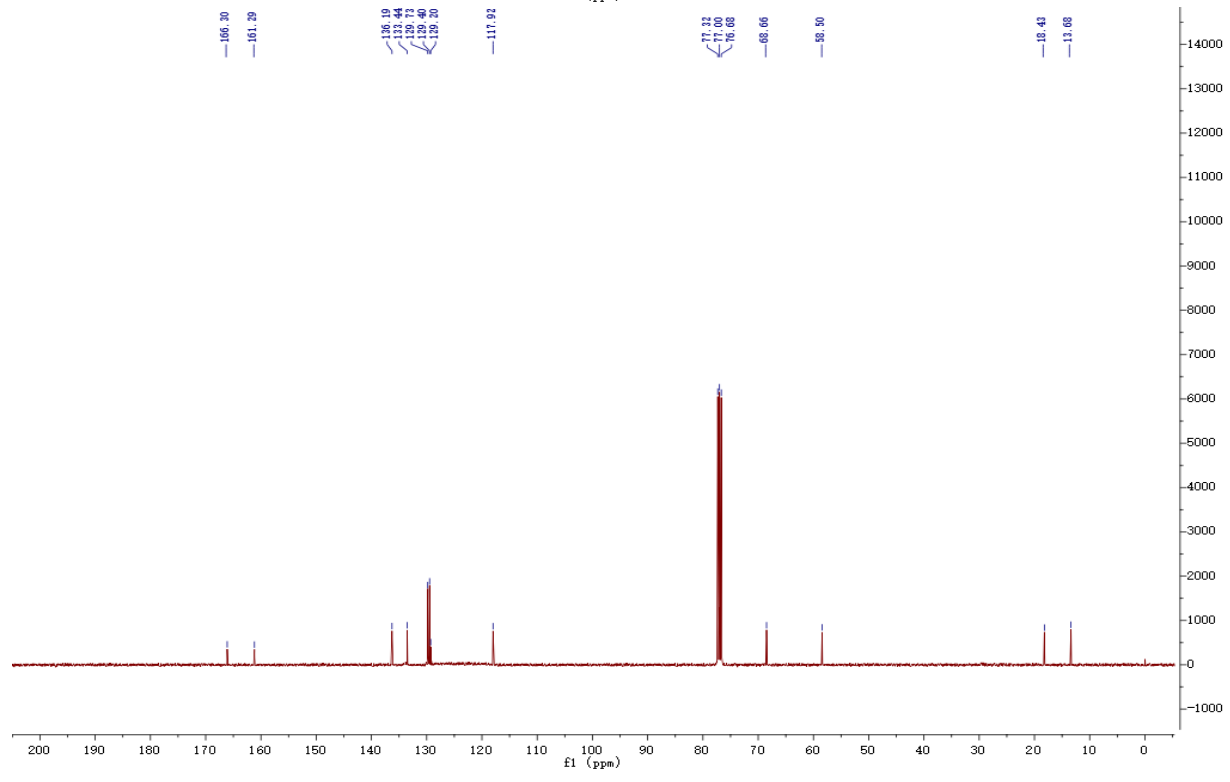

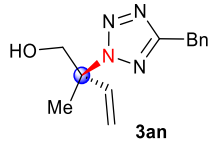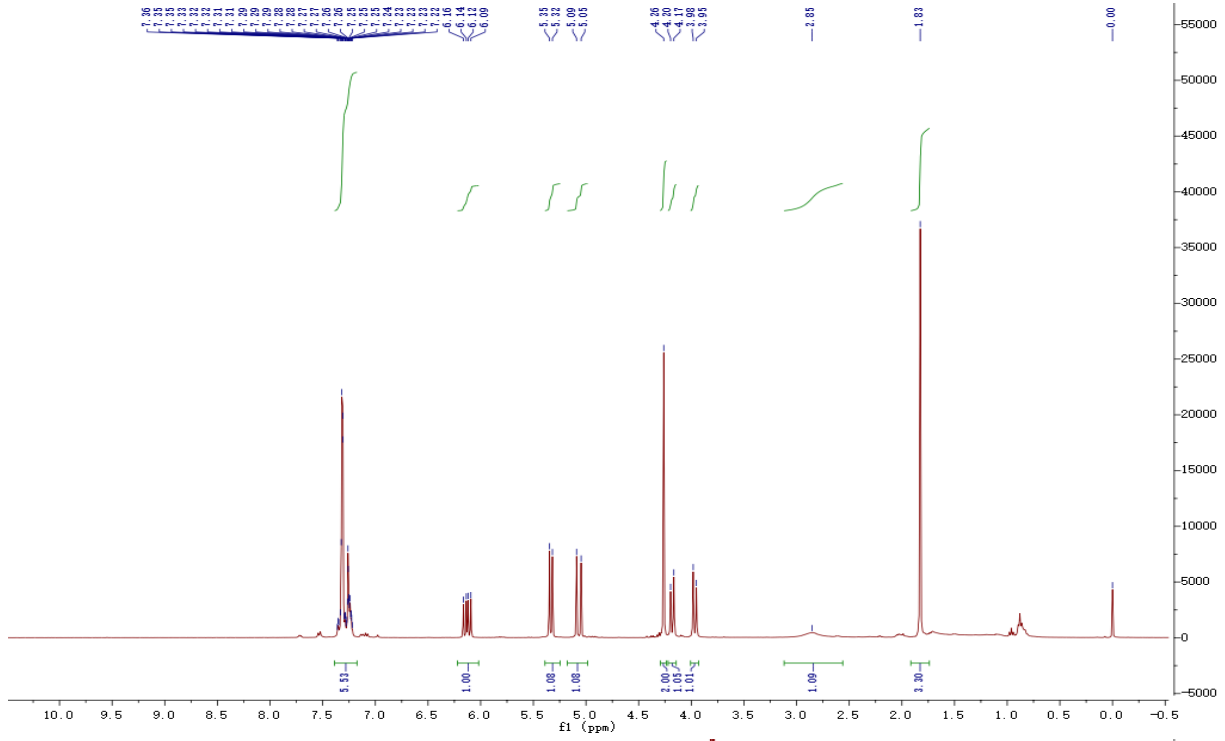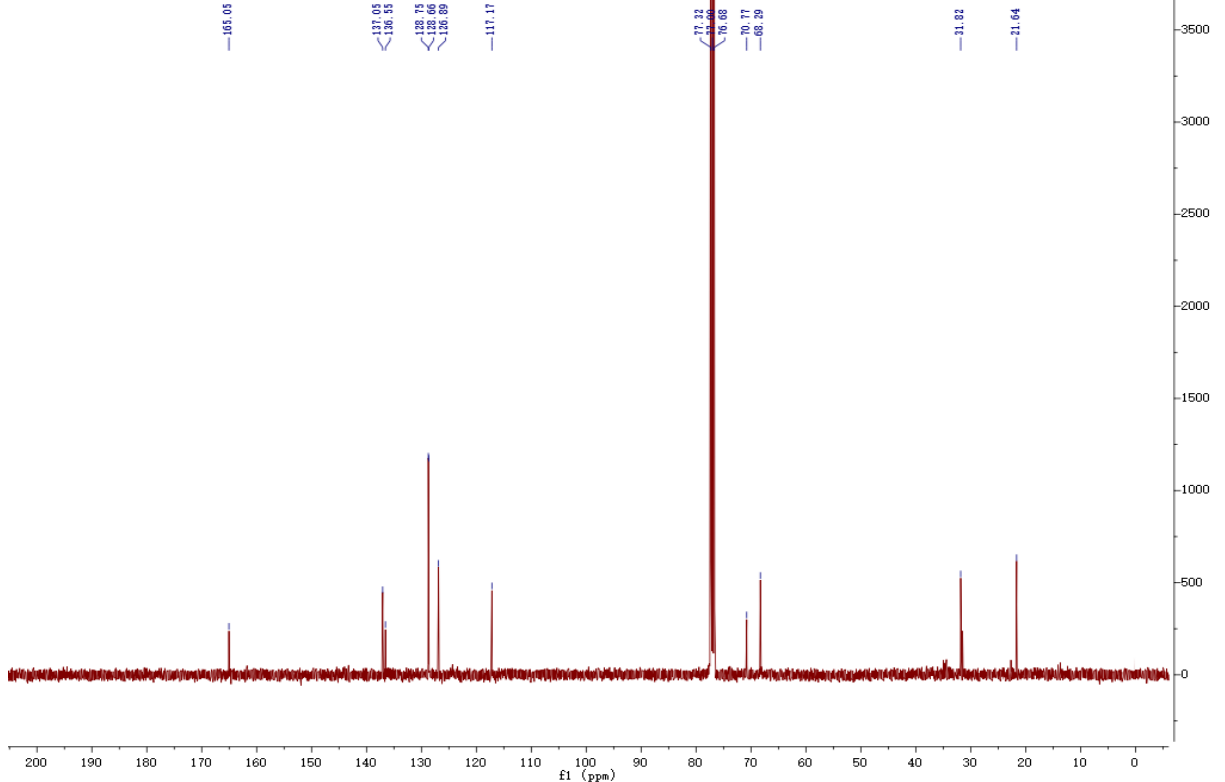



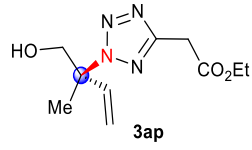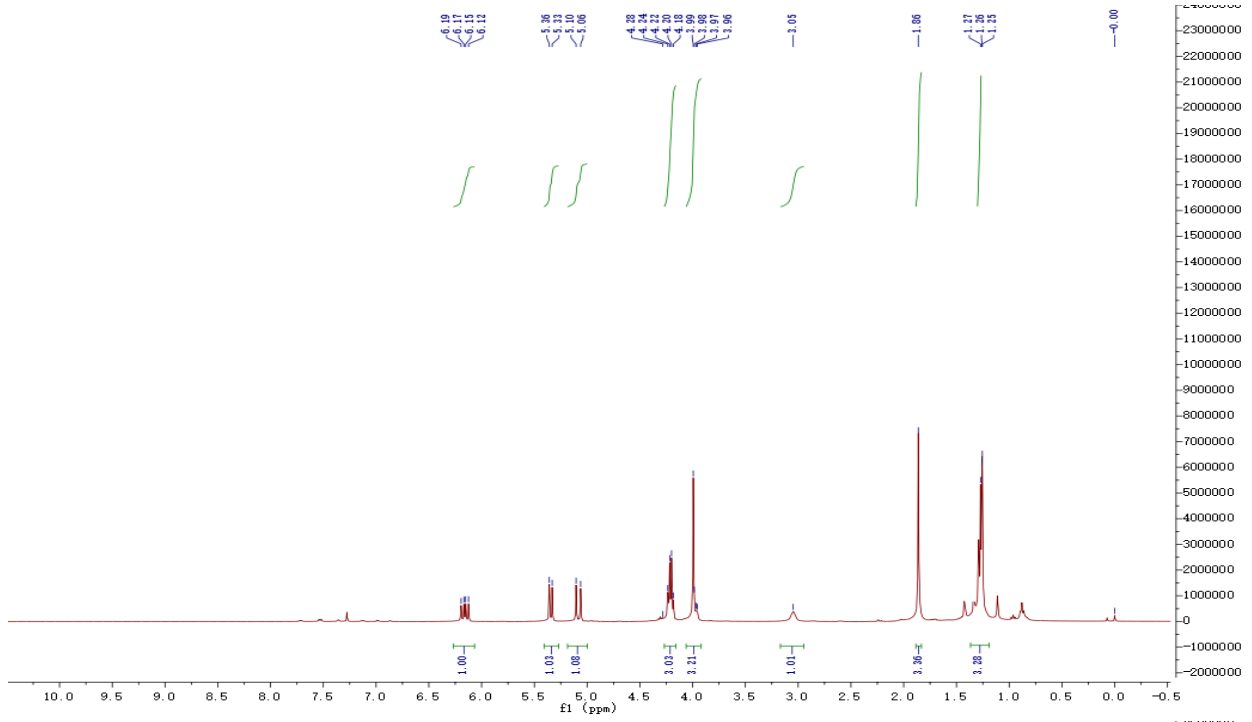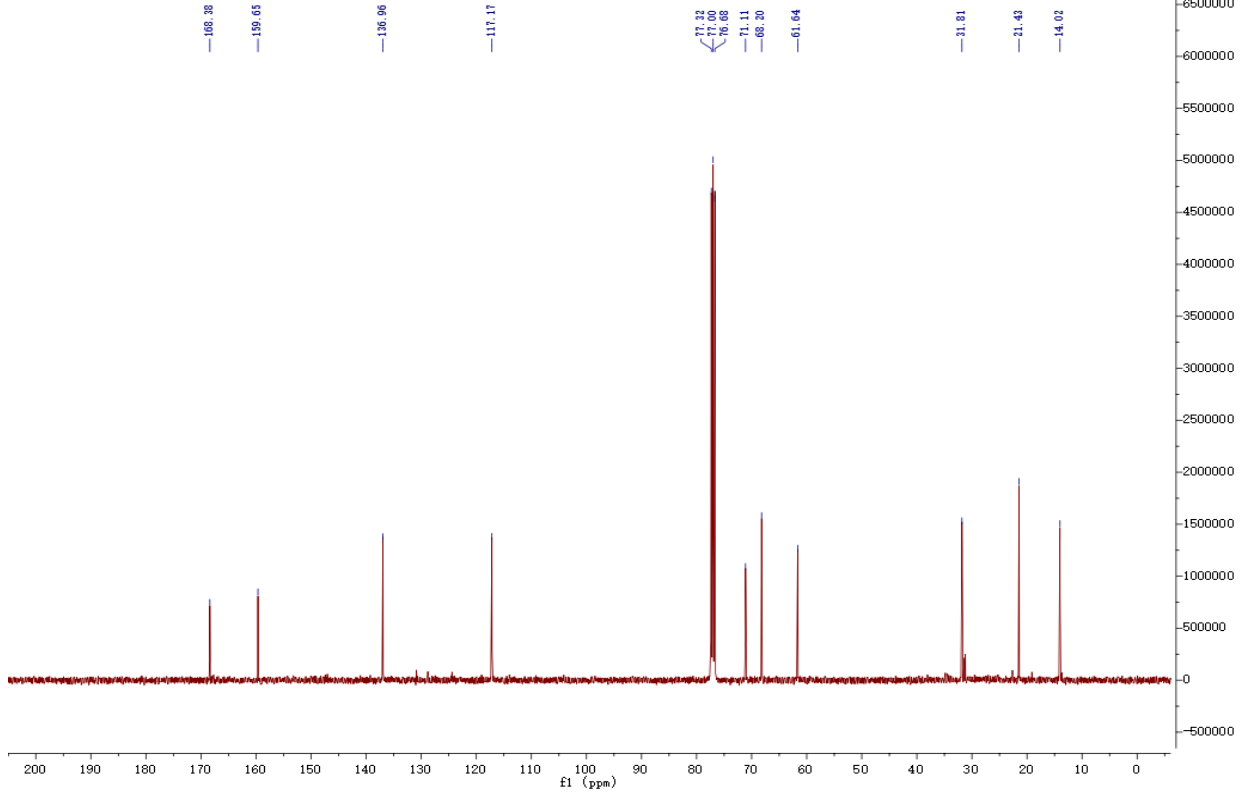

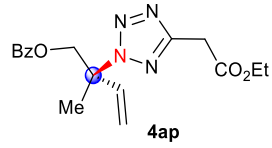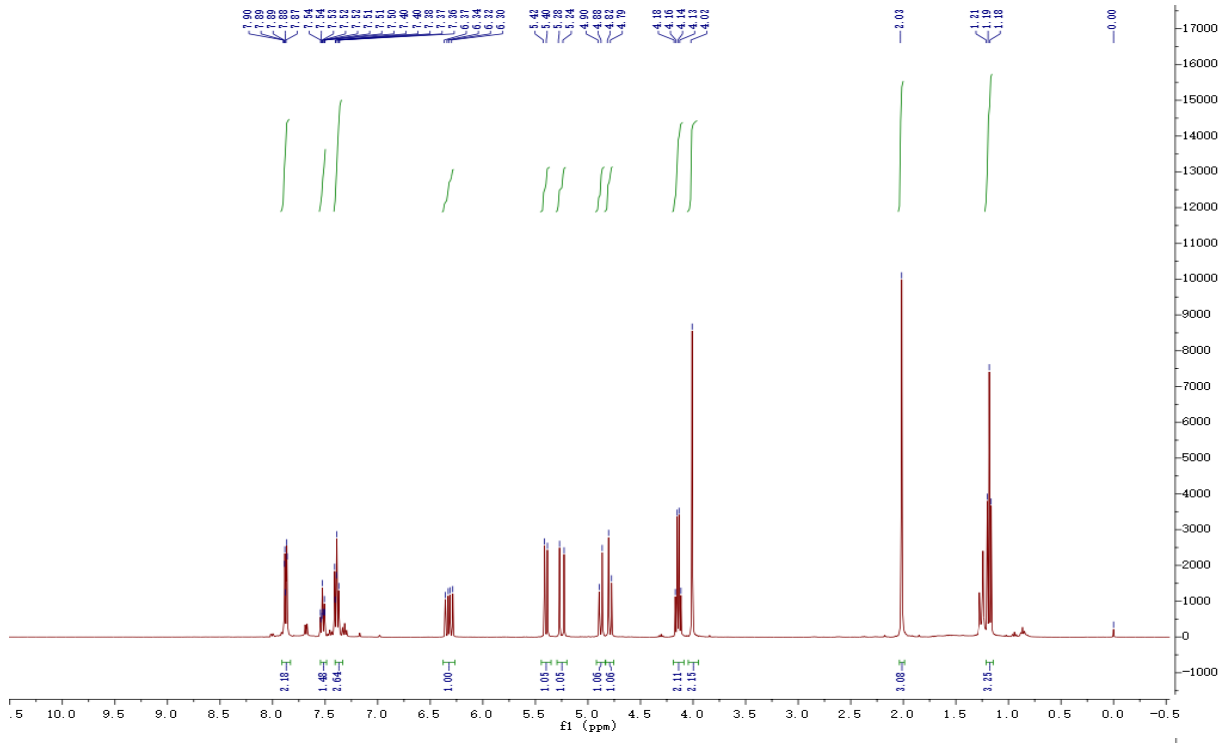



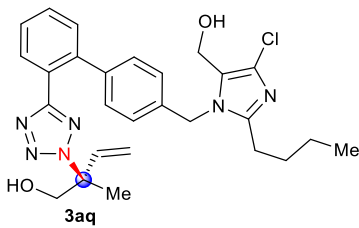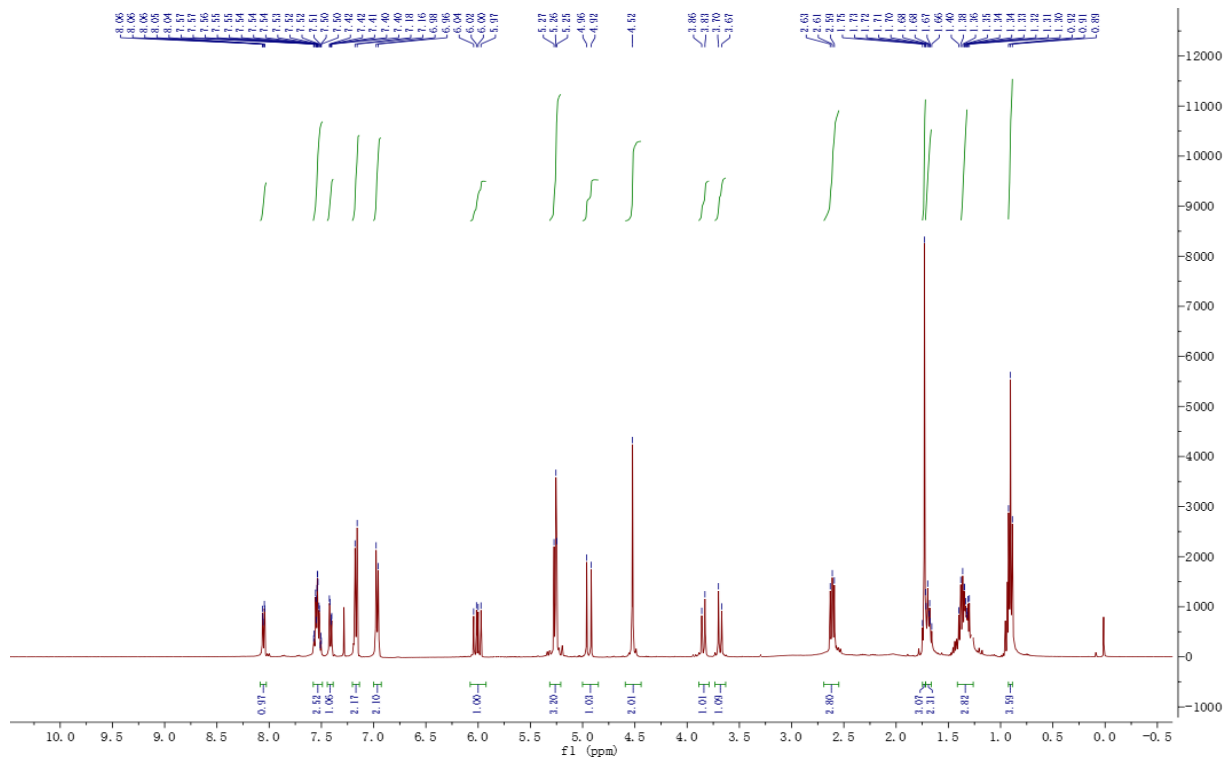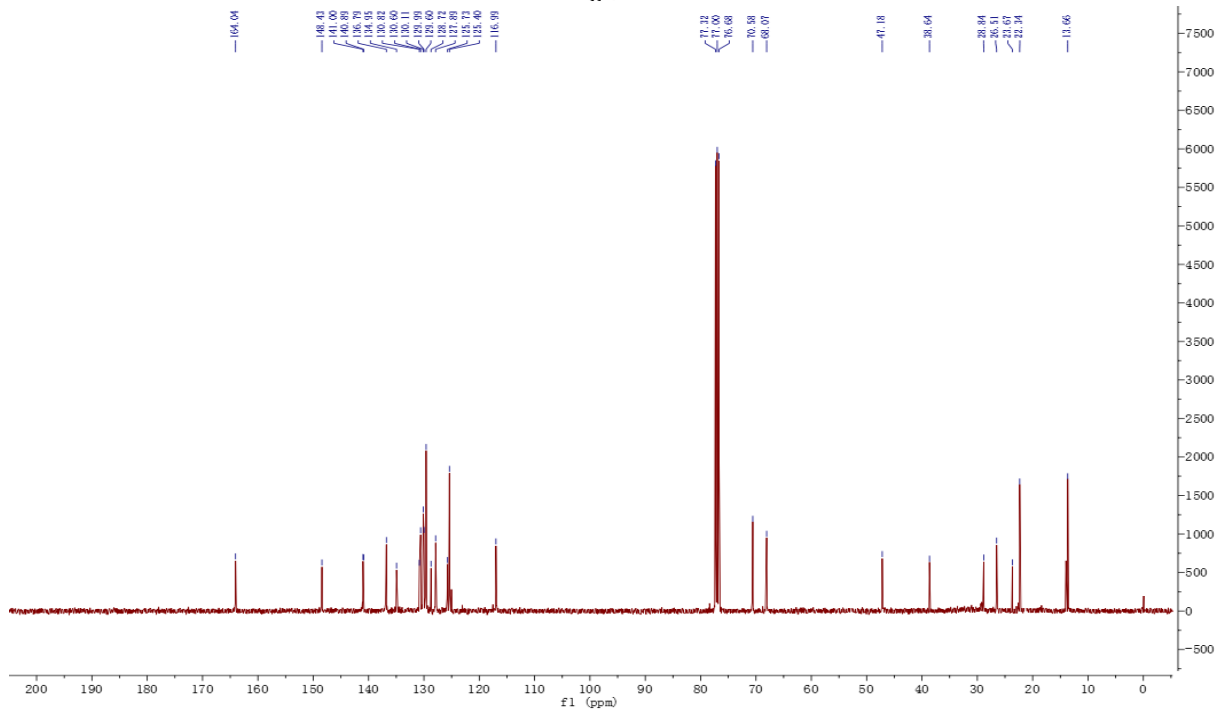



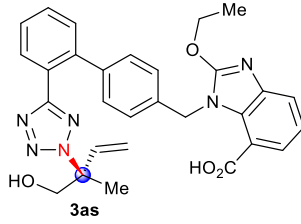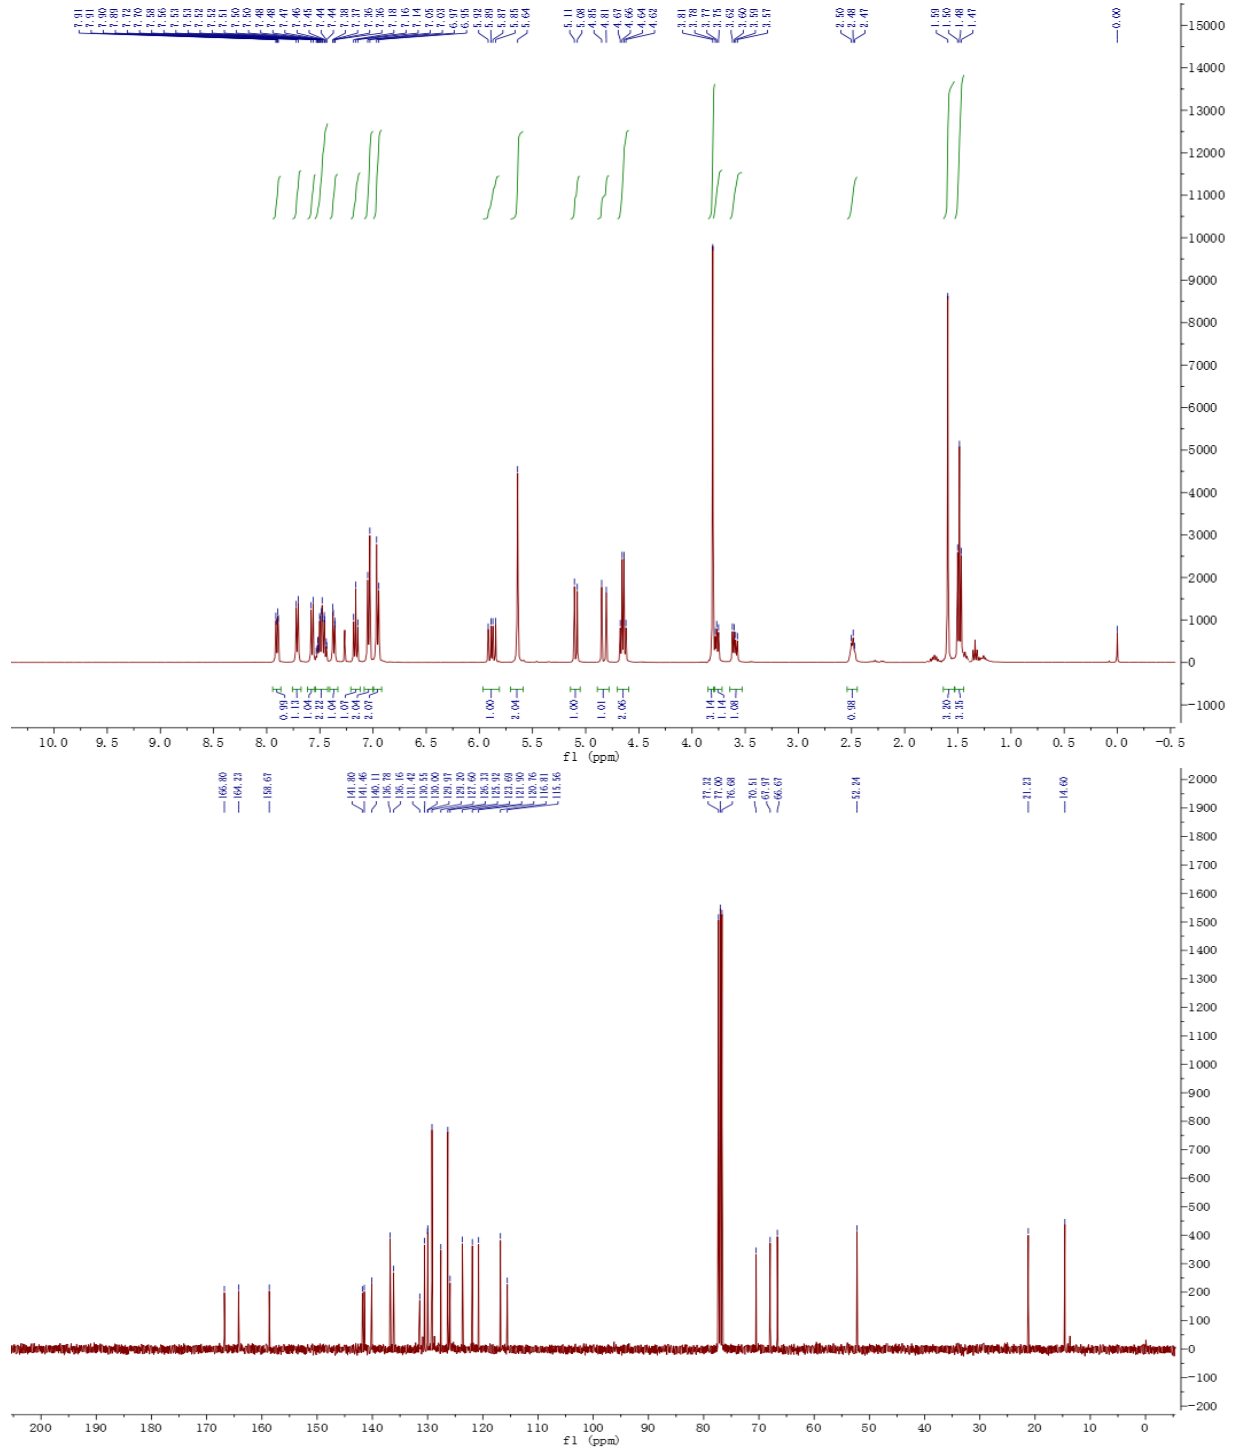

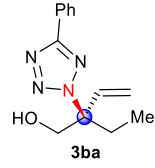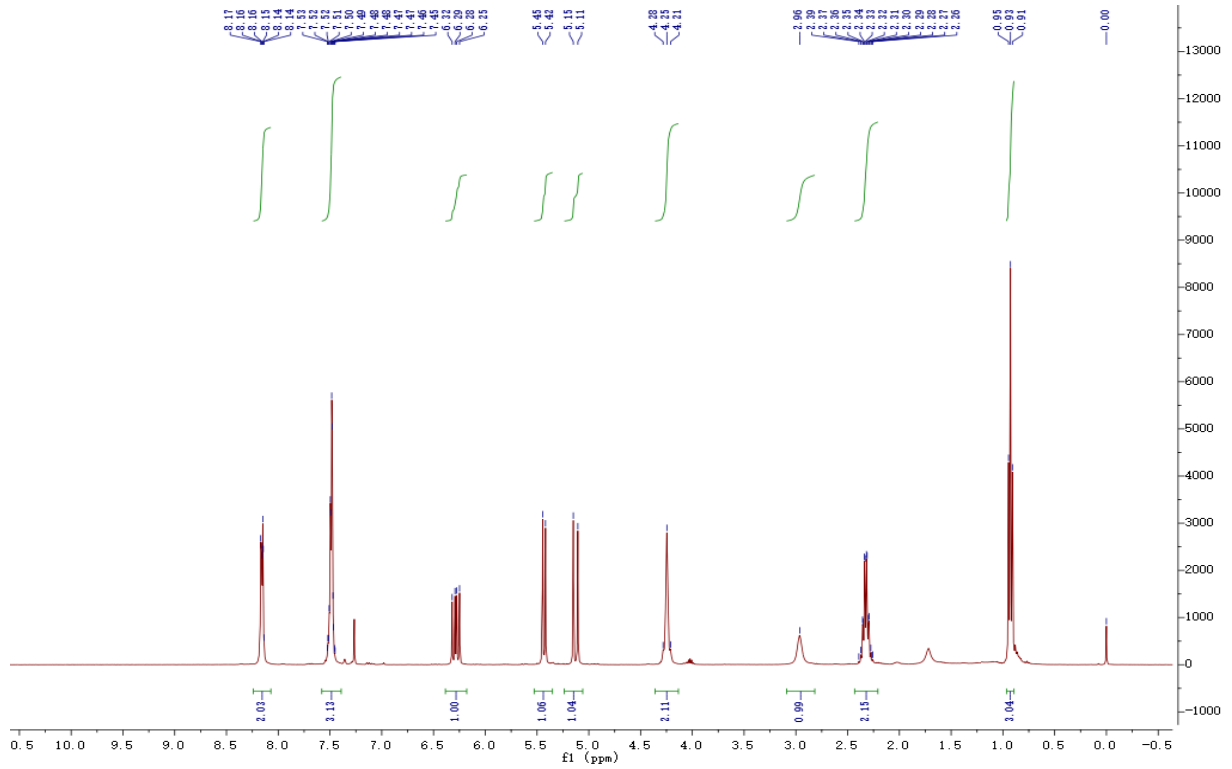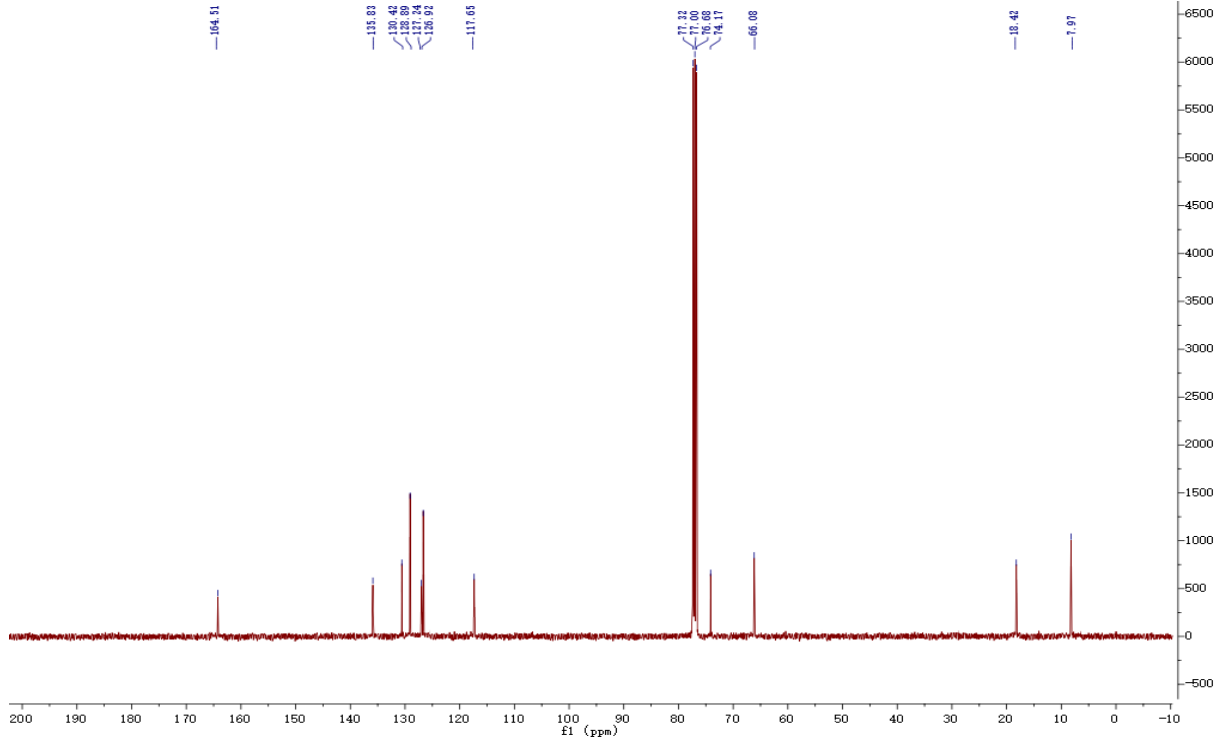

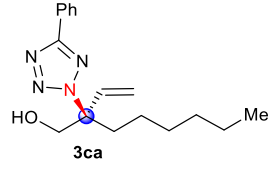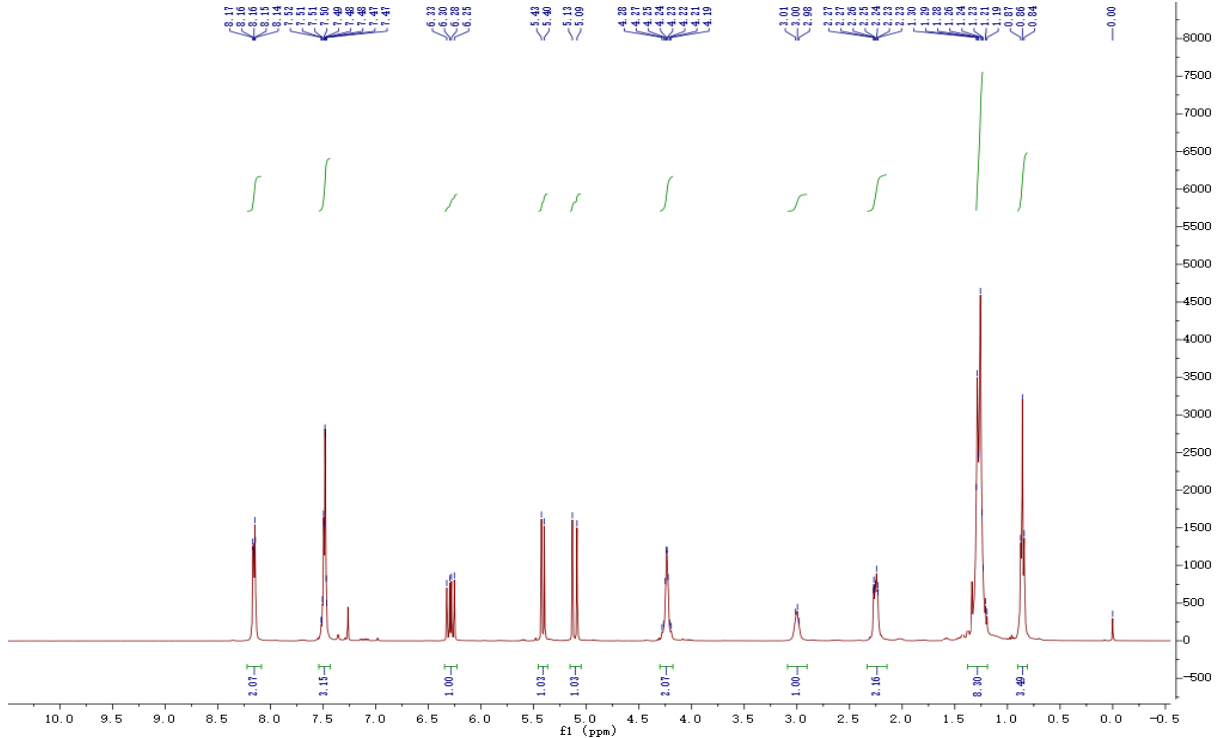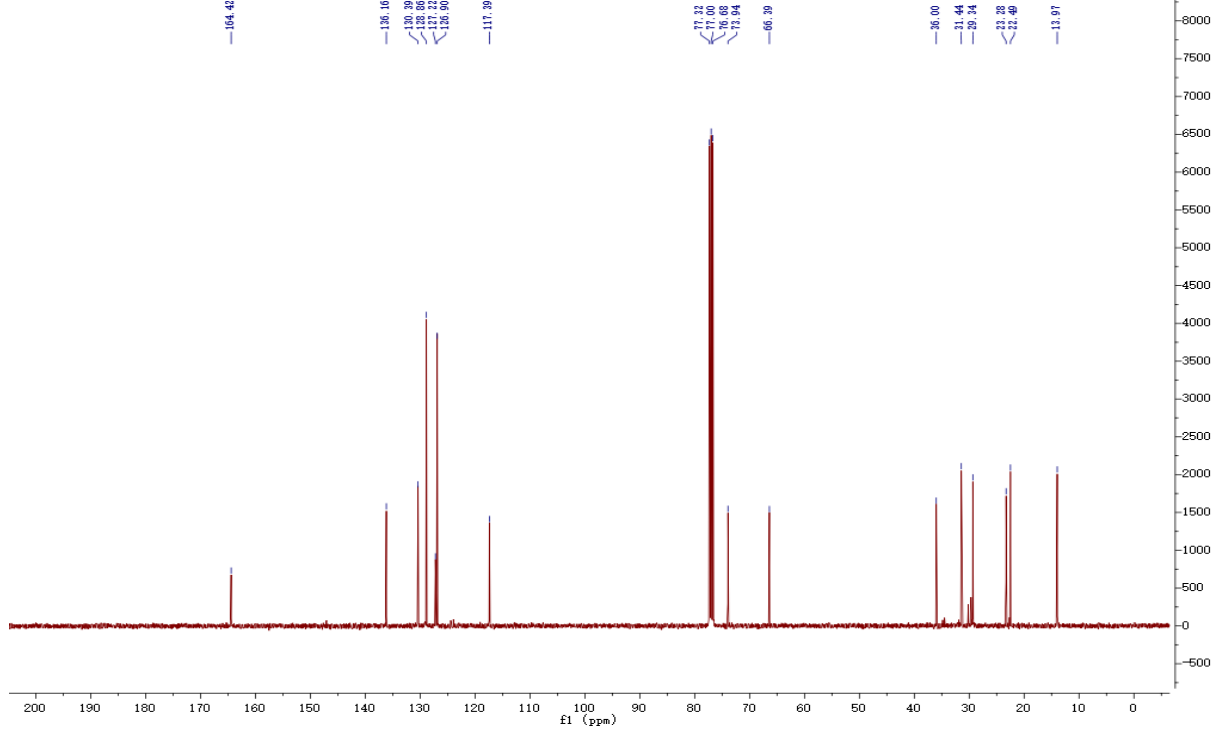

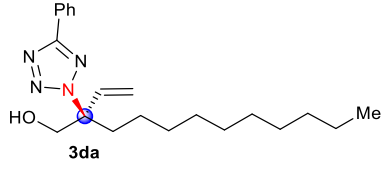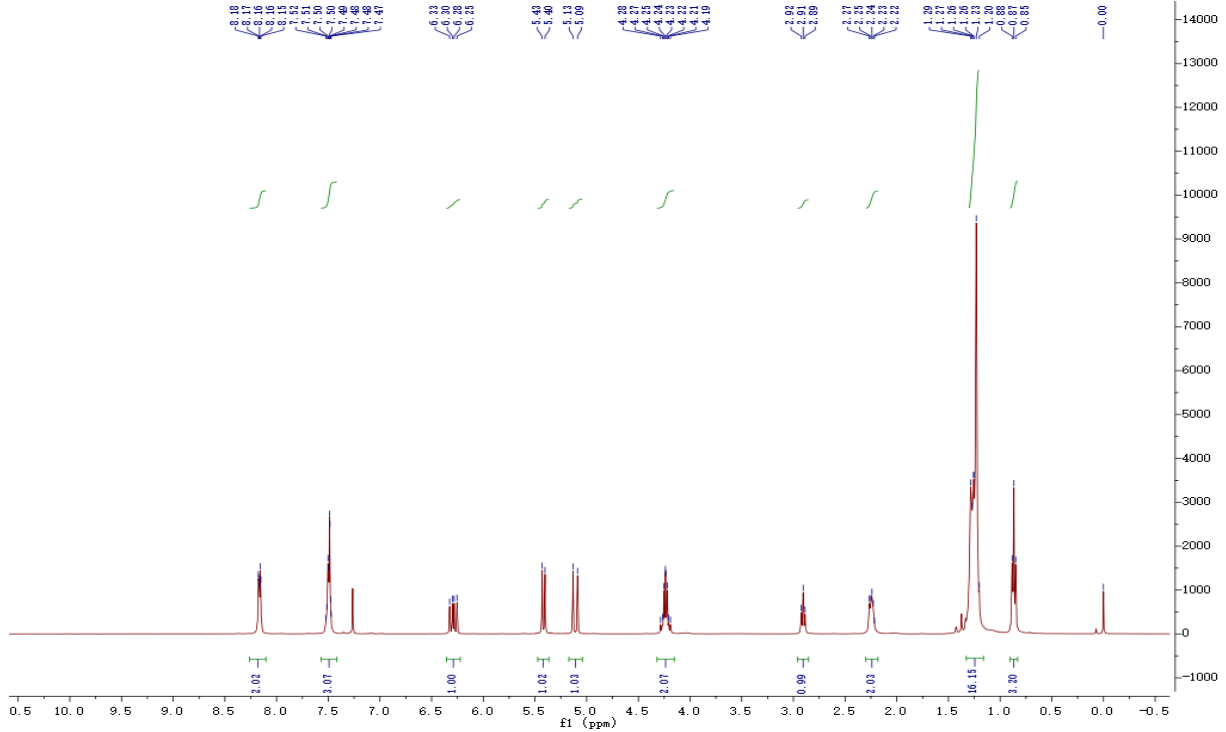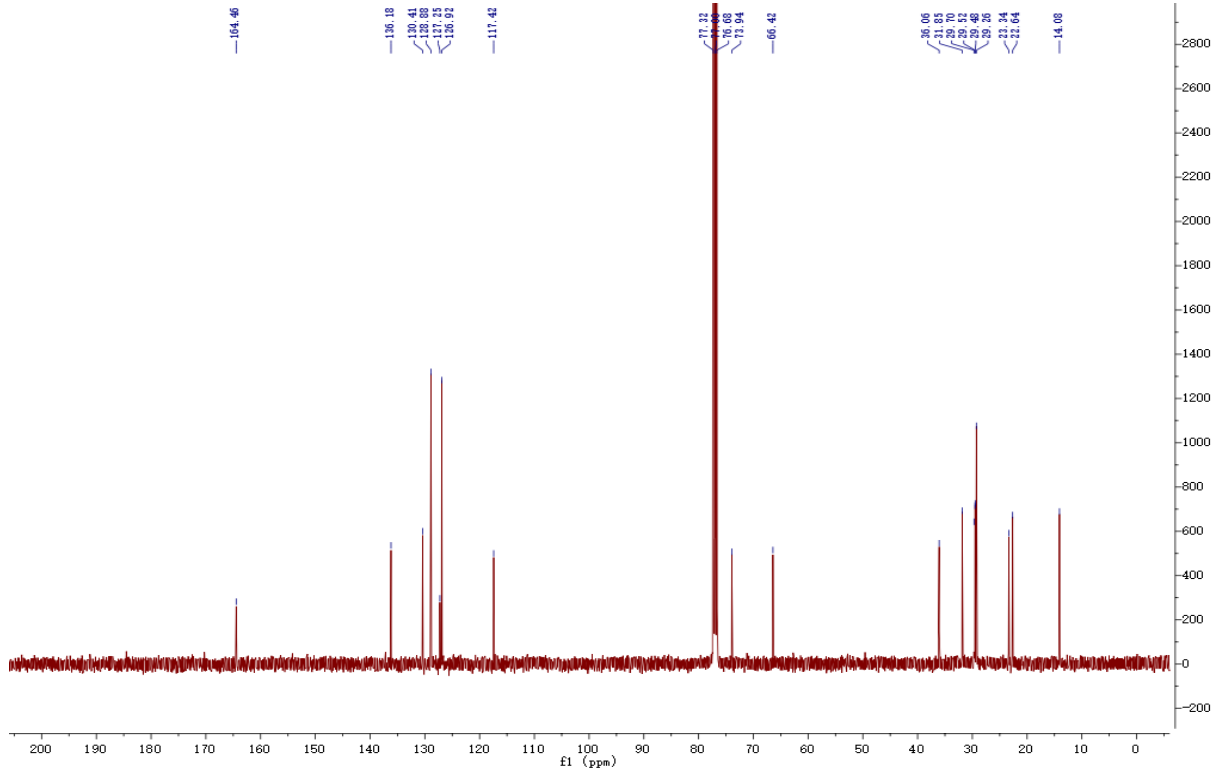



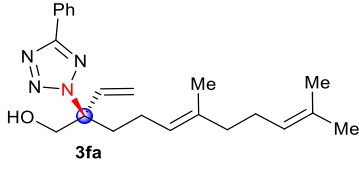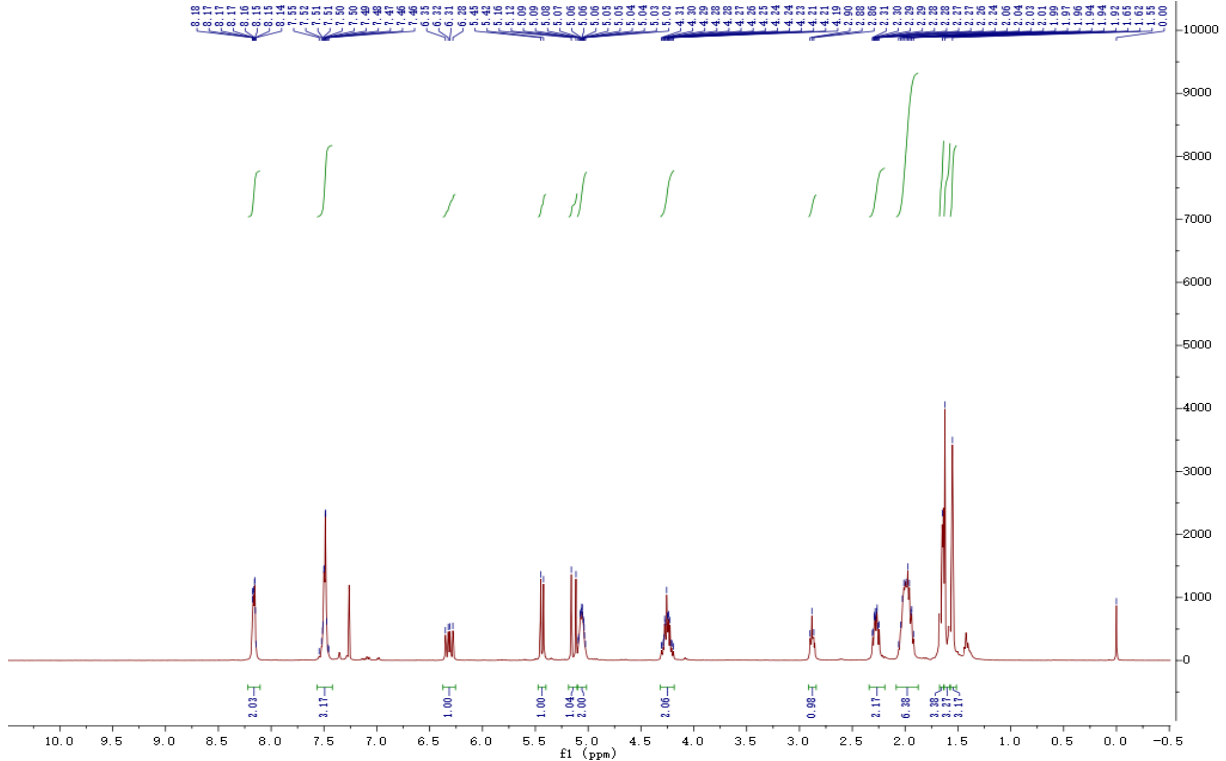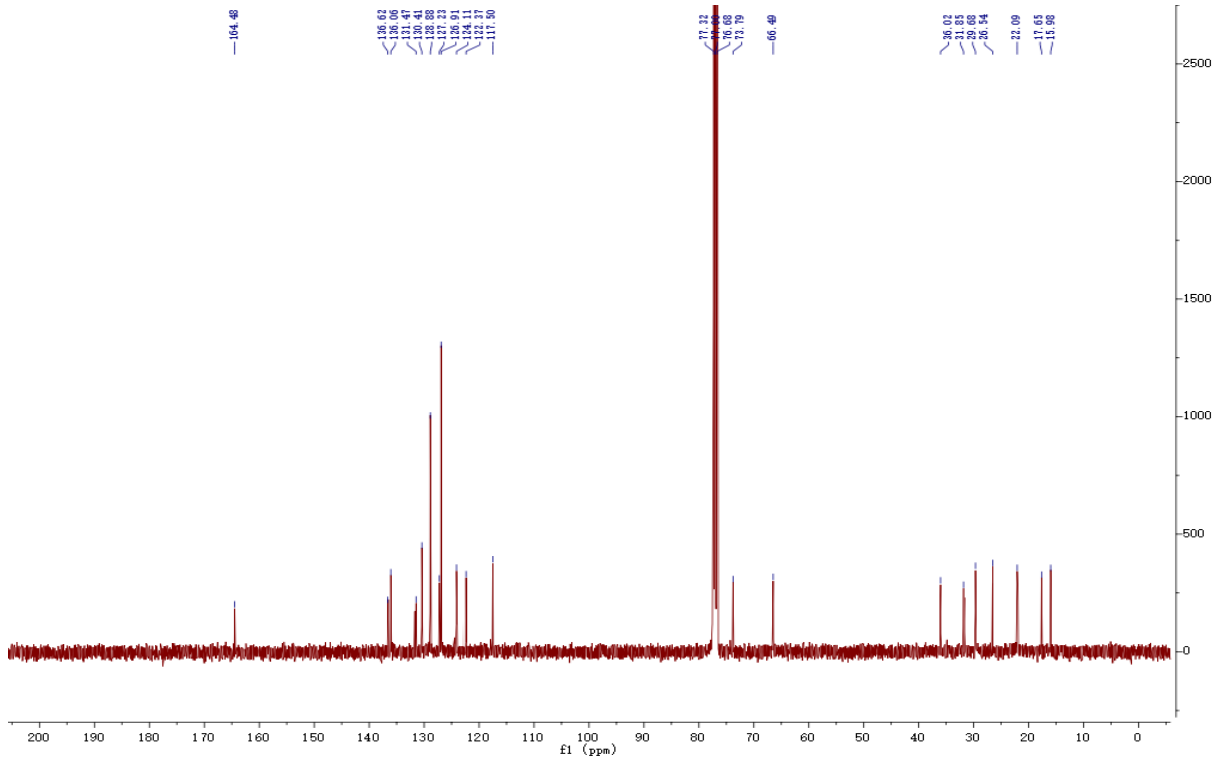







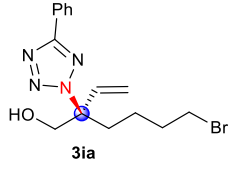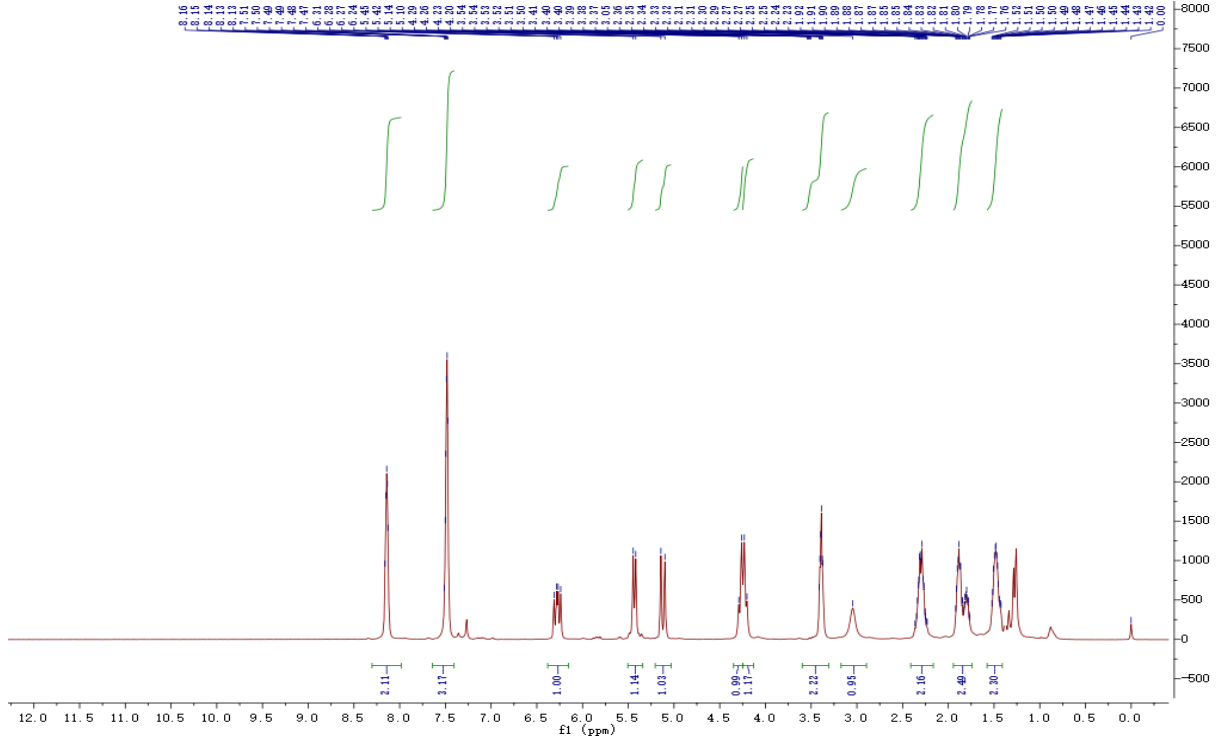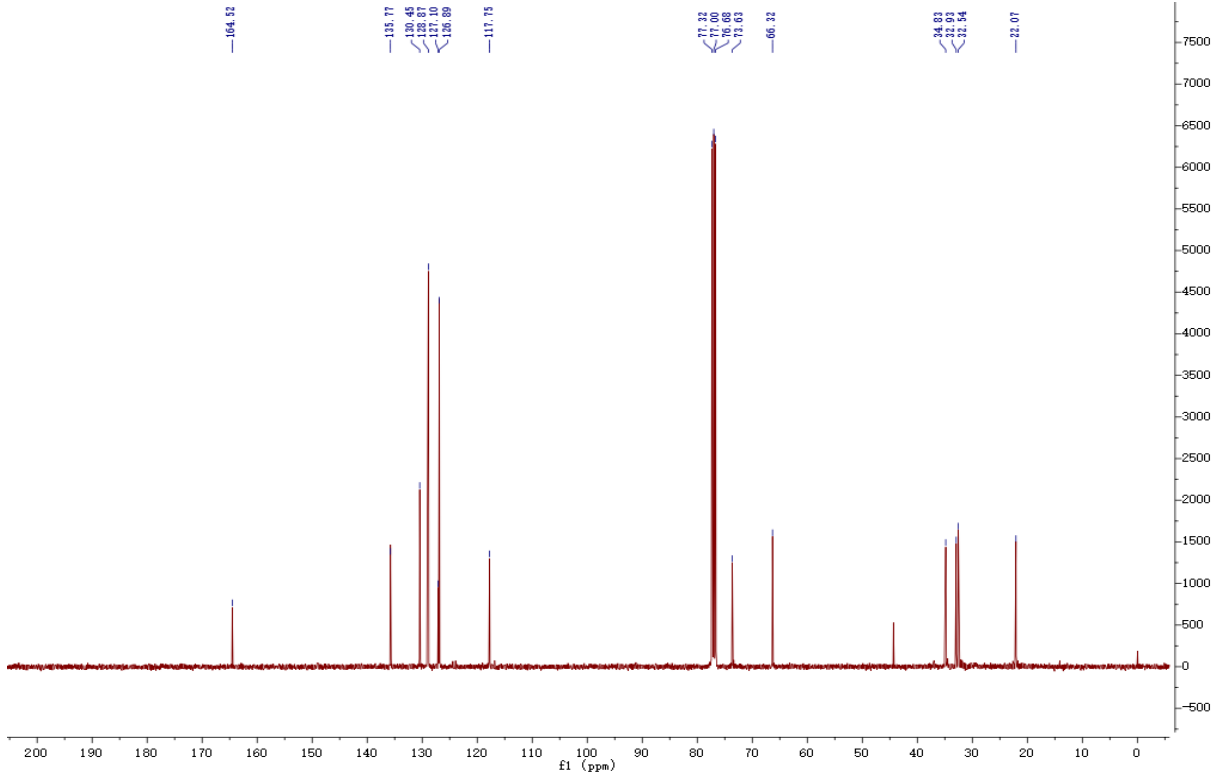



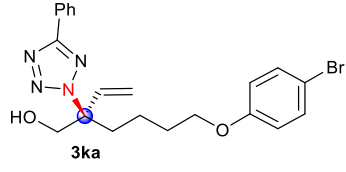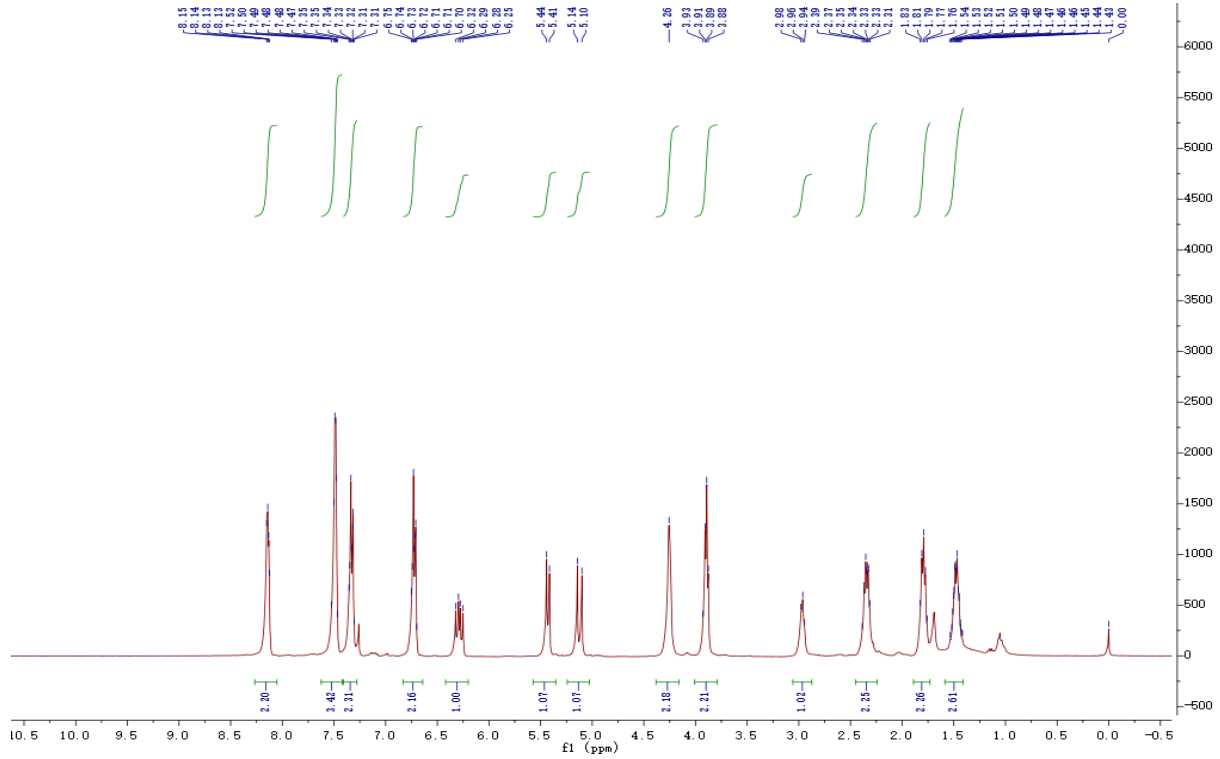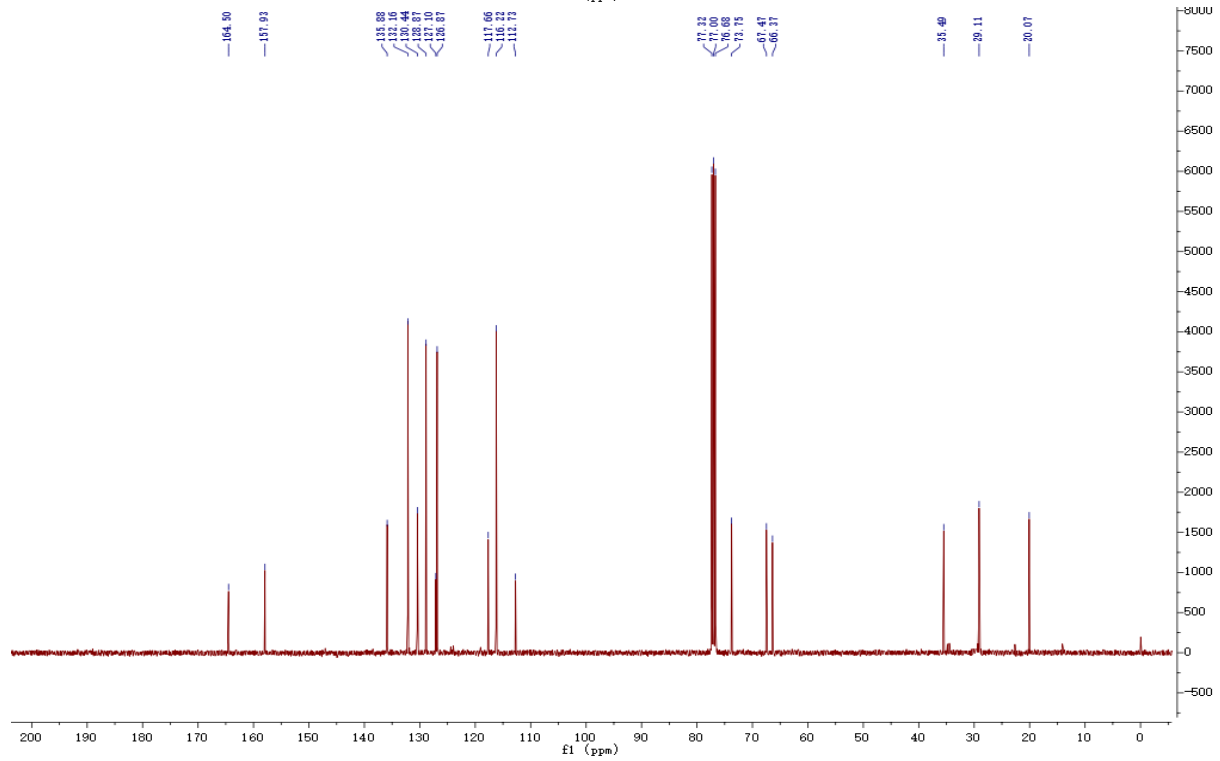

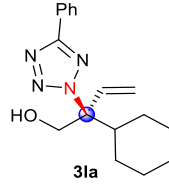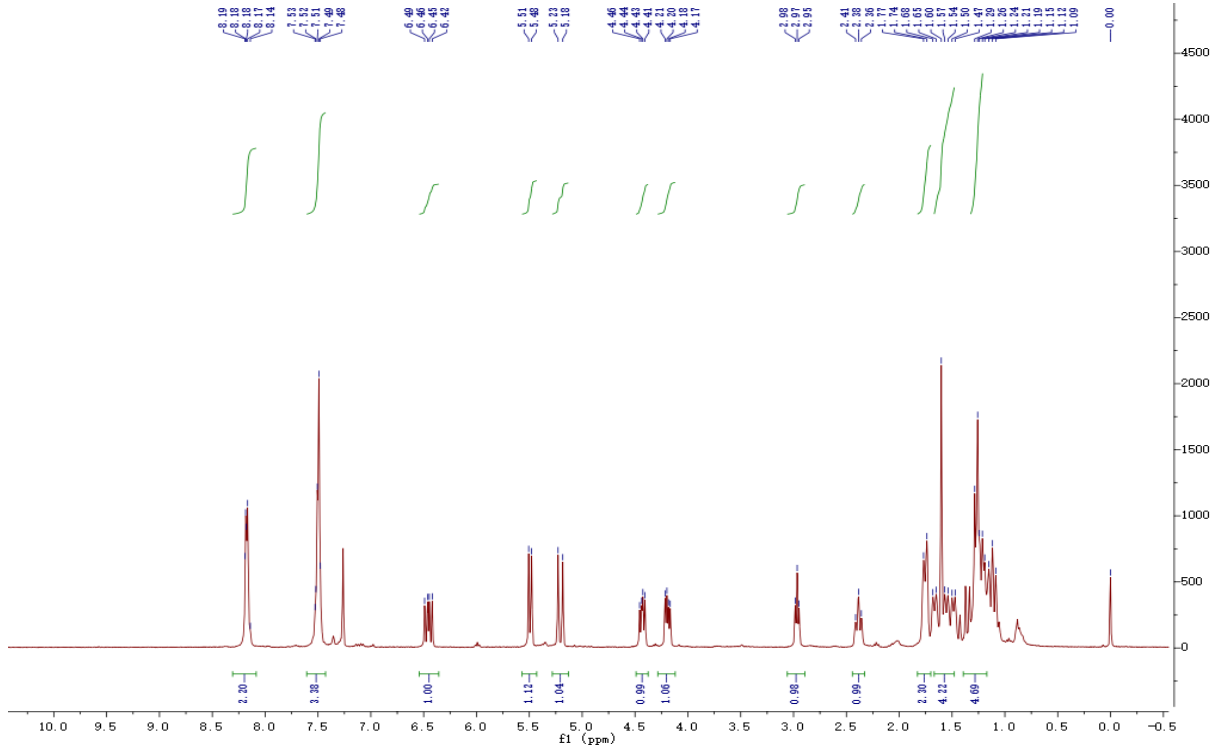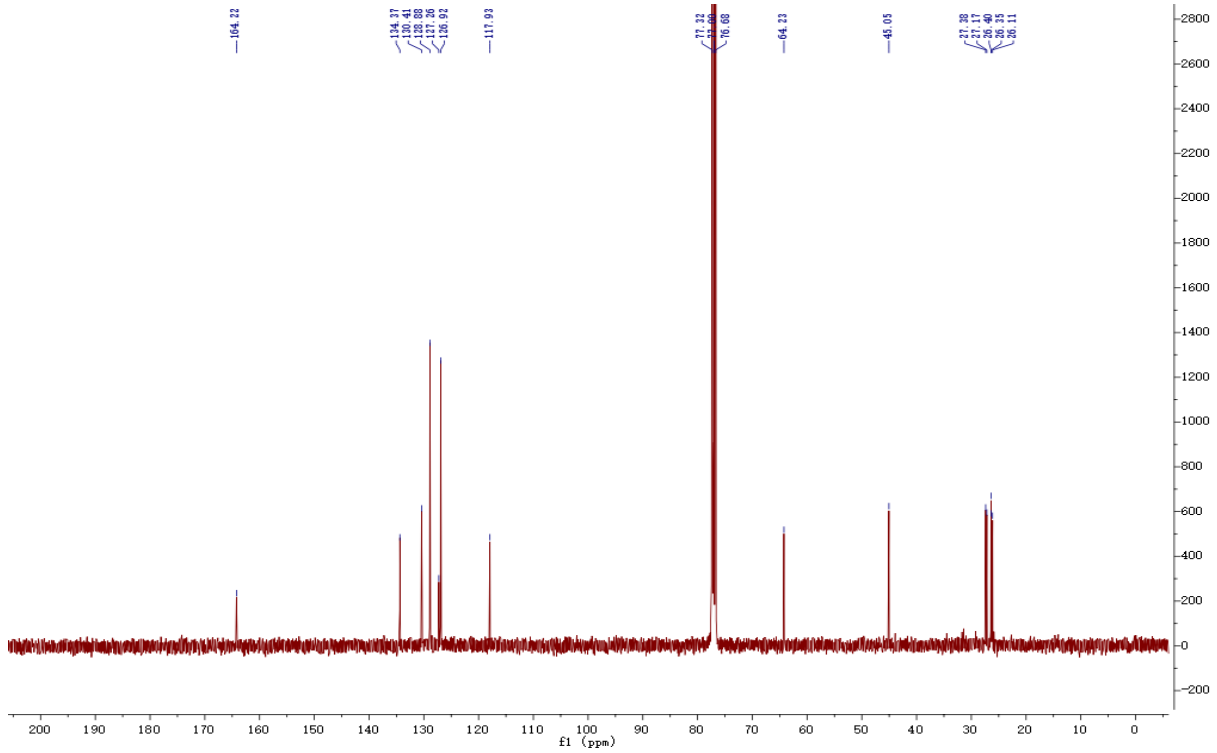

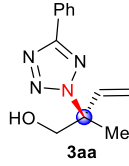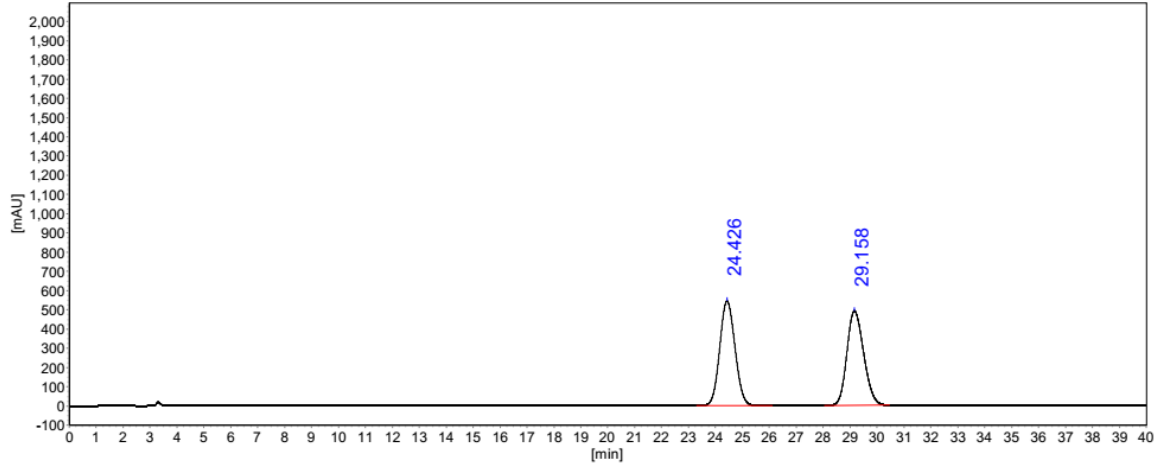

### Analysis Results

| No.           | Compound | R.Time | Height           | Area              | Area%           | Conc.           | Type |
|---------------|----------|--------|------------------|-------------------|-----------------|-----------------|------|
| 1             |          | 24.426 | 543704.8         | 21366769.0        | 49.9749         | 49.9749         | + BB |
| 2             |          | 29.158 | 491154.5         | 21388202.6        | 50.0251         | 50.0251         | + BB |
| <b>Total:</b> |          |        | <b>1034859.3</b> | <b>42754971.5</b> | <b>100.0000</b> | <b>100.0000</b> |      |

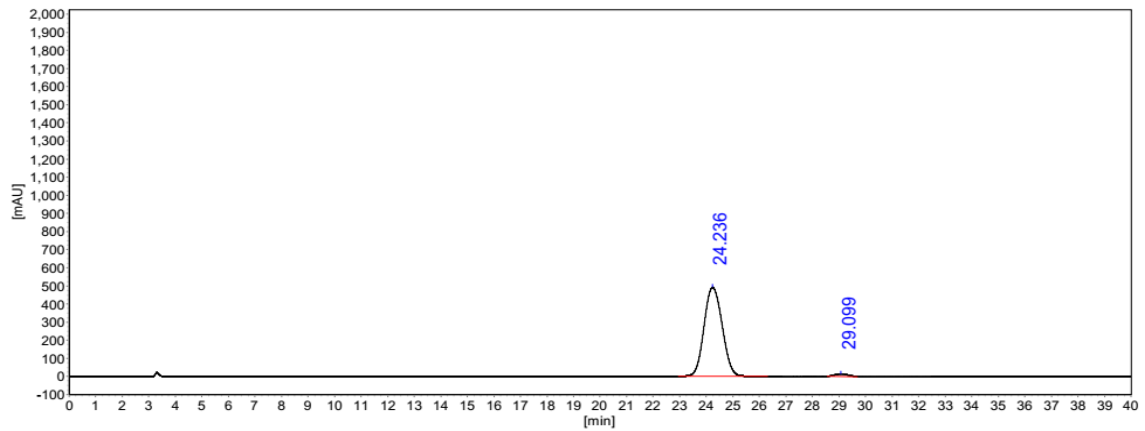

### Analysis Results

| No.           | Compound | R.Time | Height          | Area              | Area%           | Conc.           | Type |
|---------------|----------|--------|-----------------|-------------------|-----------------|-----------------|------|
| 1             |          | 24.236 | 489726.4        | 23159156.9        | 95.9793         | 95.9793         | + BB |
| 2             |          | 29.099 | 27008.7         | 1201338.0         | 4.0207          | 4.0207          | + BB |
| <b>Total:</b> |          |        | <b>516735.1</b> | <b>24360494.9</b> | <b>100.0000</b> | <b>100.0000</b> |      |

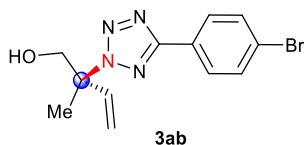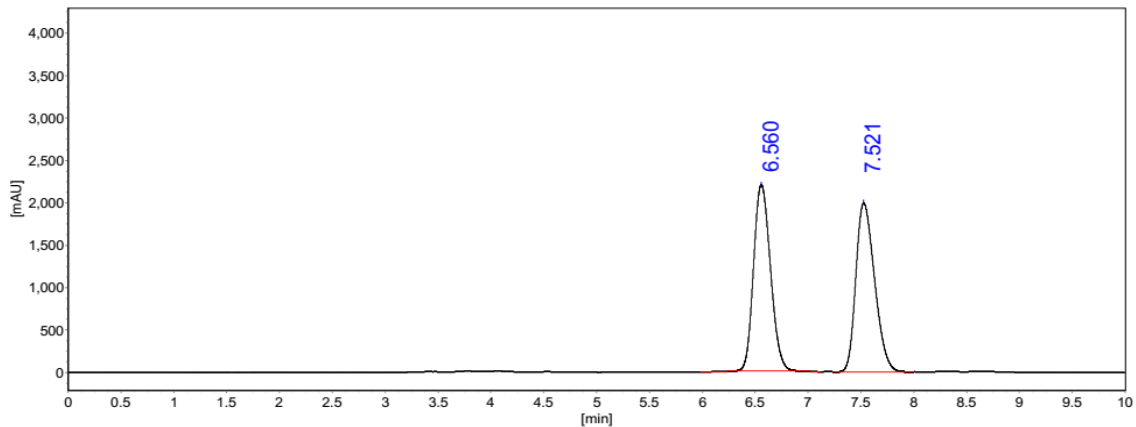

### Analysis Results

| No.           | Compound | R.Time | Height           | Area               | Area%           | Conc.           | Type |
|---------------|----------|--------|------------------|--------------------|-----------------|-----------------|------|
| 1             |          | 6.560  | 3341483.0        | 53478455.3         | 49.1750         | 49.1750         | + BB |
| 2             |          | 7.521  | 3244031.2        | 55272920.5         | 50.8250         | 50.8250         | + BB |
| <b>Total:</b> |          |        | <b>6585514.2</b> | <b>108751375.8</b> | <b>100.0000</b> | <b>100.0000</b> |      |

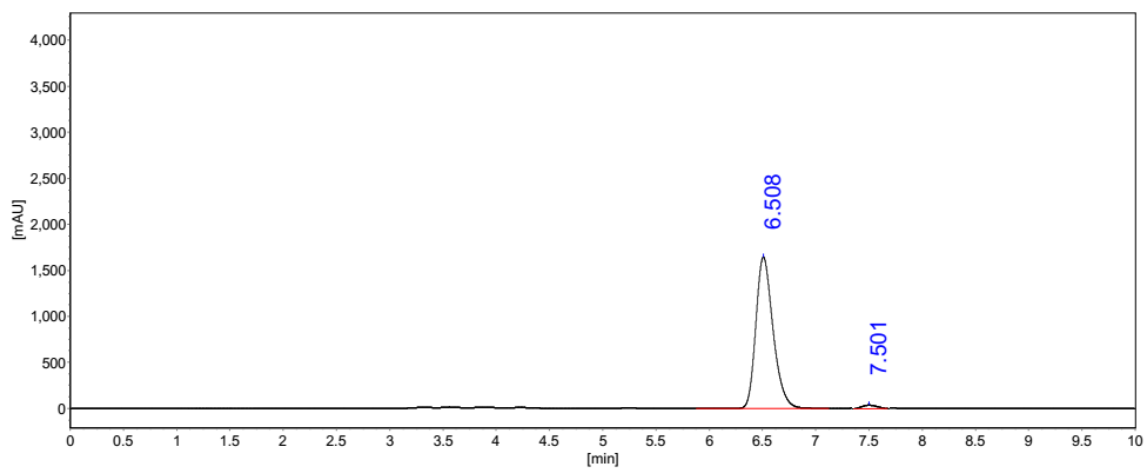

### Analysis Results

| No.           | Compound | R.Time | Height           | Area              | Area%           | Conc.           | Type |
|---------------|----------|--------|------------------|-------------------|-----------------|-----------------|------|
| 1             |          | 6.508  | 1644741.6        | 18475437.8        | 97.7957         | 97.7957         | + BB |
| 2             |          | 7.501  | 40172.4          | 416436.5          | 2.2043          | 2.2043          | + BB |
| <b>Total:</b> |          |        | <b>1684914.0</b> | <b>18891874.3</b> | <b>100.0000</b> | <b>100.0000</b> |      |



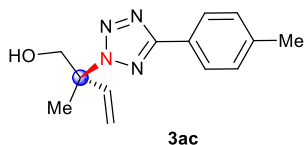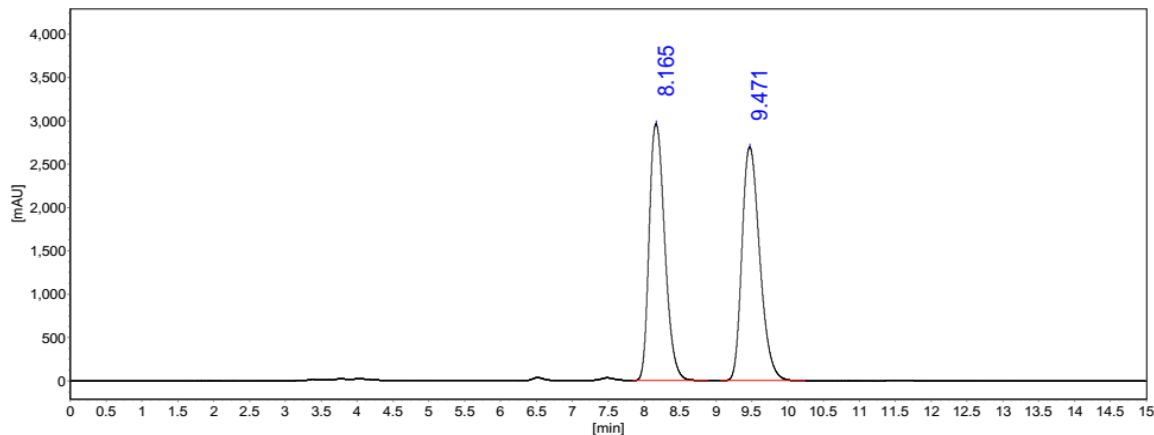

### Analysis Results

| No.           | Compound | R.Time | Height           | Area              | Area%           | Conc.           | Type |
|---------------|----------|--------|------------------|-------------------|-----------------|-----------------|------|
| 1             |          | 8.165  | 2963080.6        | 44765225.5        | 49.0351         | 49.0351         | + BB |
| 2             |          | 9.471  | 2700856.4        | 46526998.1        | 50.9649         | 50.9649         | + BB |
| <b>Total:</b> |          |        | <b>5663937.0</b> | <b>91292223.6</b> | <b>100.0000</b> | <b>100.0000</b> |      |

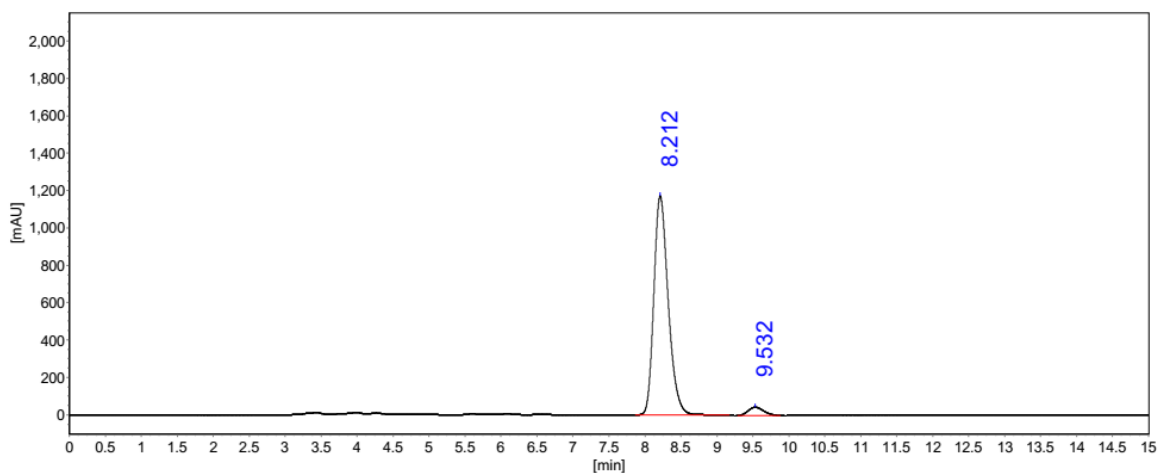

### Analysis Results

| No.           | Compound | R.Time | Height           | Area              | Area%           | Conc.           | Type |
|---------------|----------|--------|------------------|-------------------|-----------------|-----------------|------|
| 1             |          | 8.212  | 1171927.1        | 16180336.9        | 95.8512         | 95.8512         | + BB |
| 2             |          | 9.532  | 45652.3          | 700350.2          | 4.1488          | 4.1488          | + BB |
| <b>Total:</b> |          |        | <b>1217579.4</b> | <b>16880687.1</b> | <b>100.0000</b> | <b>100.0000</b> |      |



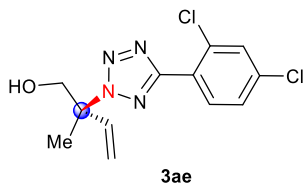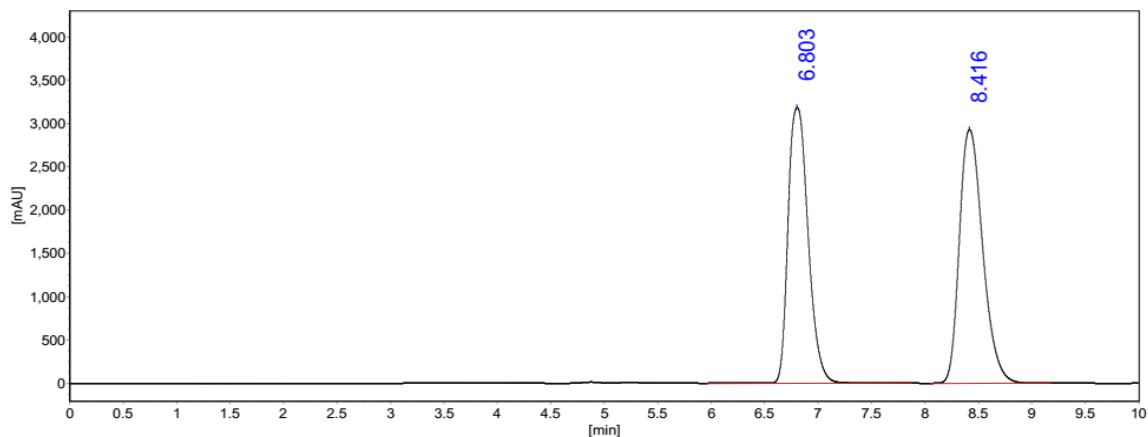

### Analysis Results

| No.           | Compound | R.Time | Height           | Area              | Area%           | Conc.           | Type |
|---------------|----------|--------|------------------|-------------------|-----------------|-----------------|------|
| 1             |          | 6.803  | 3181454.8        | 41454359.7        | 48.2396         | 48.2396         | + BB |
| 2             |          | 8.416  | 2928437.8        | 44479959.3        | 51.7604         | 51.7604         | + BB |
| <b>Total:</b> |          |        | <b>6109892.6</b> | <b>85934318.9</b> | <b>100.0000</b> | <b>100.0000</b> |      |

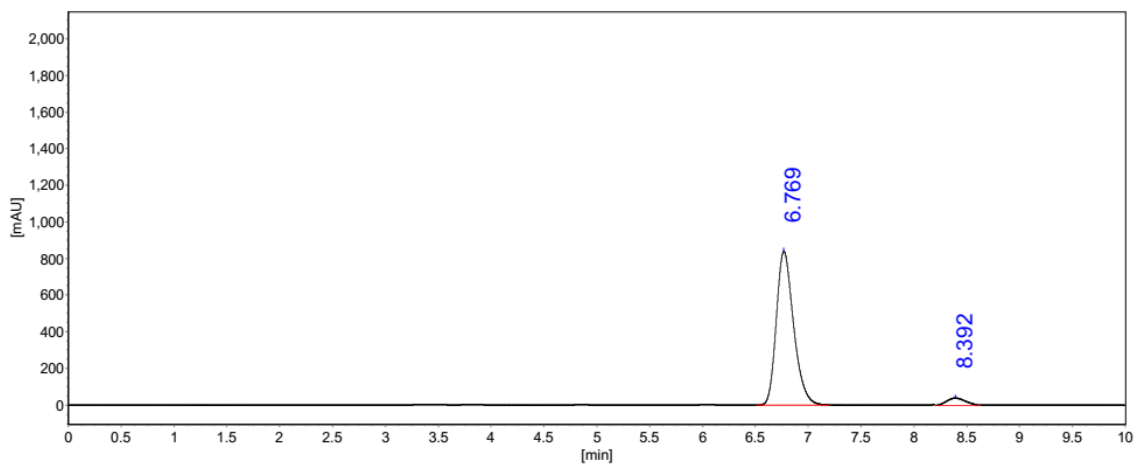

### Analysis Results

| No.           | Compound | R.Time | Height          | Area              | Area%           | Conc.           | Type |
|---------------|----------|--------|-----------------|-------------------|-----------------|-----------------|------|
| 1             |          | 6.769  | 839787.7        | 9497410.8         | 94.8005         | 94.8005         | + BB |
| 2             |          | 8.392  | 40948.9         | 520906.7          | 5.1995          | 5.1995          | + BB |
| <b>Total:</b> |          |        | <b>880736.6</b> | <b>10018317.5</b> | <b>100.0000</b> | <b>100.0000</b> |      |



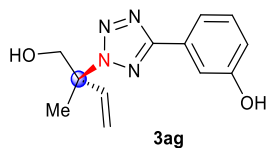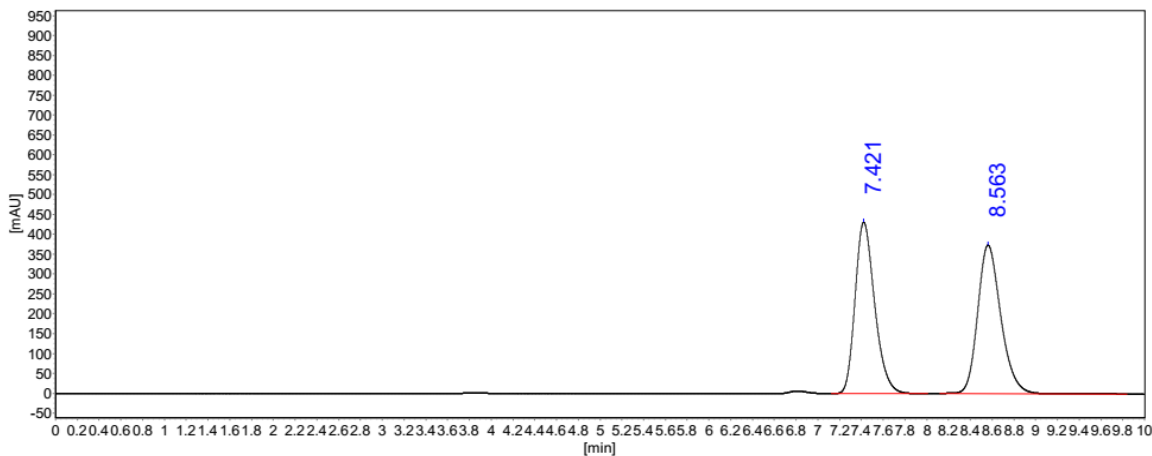

### Analysis Results

| No.           | Compound | R.Time | Height          | Area              | Area%           | Conc.           | Type |
|---------------|----------|--------|-----------------|-------------------|-----------------|-----------------|------|
| 1             |          | 7.421  | 431485.8        | 5410075.4         | 49.5250         | 49.5250         | + BB |
| 2             |          | 8.563  | 373916.0        | 5513846.0         | 50.4750         | 50.4750         | + BB |
| <b>Total:</b> |          |        | <b>805401.8</b> | <b>10923921.4</b> | <b>100.0000</b> | <b>100.0000</b> |      |

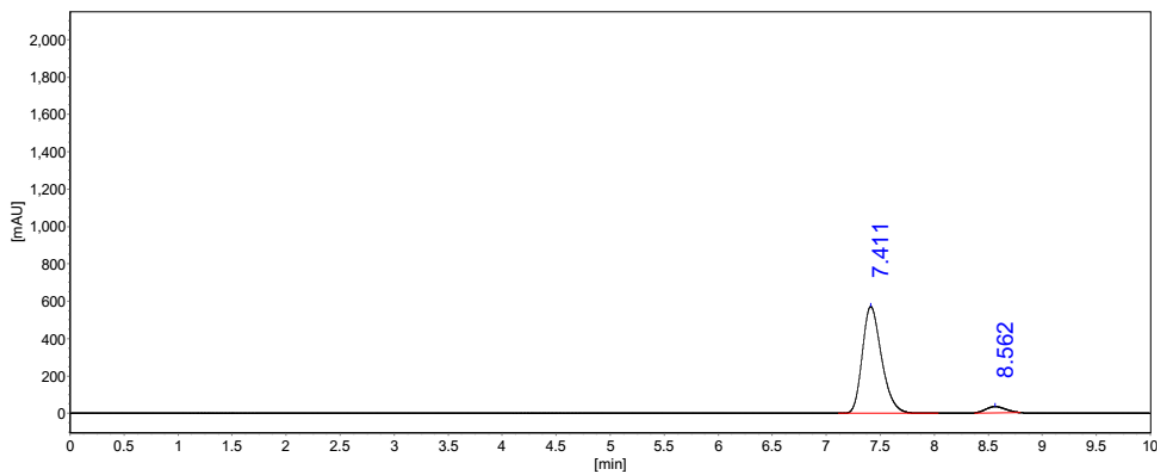

### Analysis Results

| No.           | Compound | R.Time | Height          | Area             | Area%           | Conc.           | Type |
|---------------|----------|--------|-----------------|------------------|-----------------|-----------------|------|
| 1             |          | 7.411  | 572413.3        | 7117180.2        | 94.4491         | 94.4491         | + BB |
| 2             |          | 8.562  | 33111.6         | 418290.1         | 5.5509          | 5.5509          | + BB |
| <b>Total:</b> |          |        | <b>605524.9</b> | <b>7535470.3</b> | <b>100.0000</b> | <b>100.0000</b> |      |

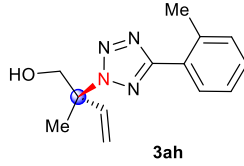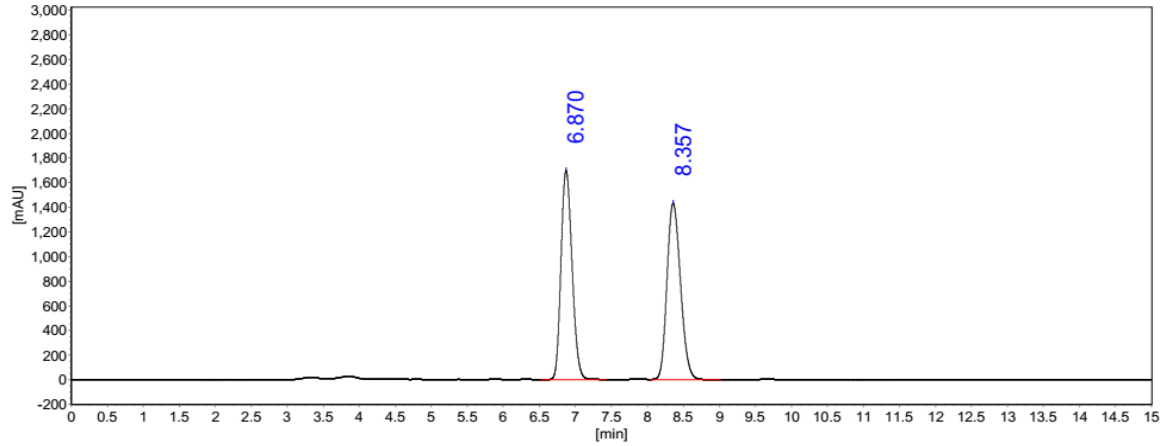

### Analysis Results

| No.           | Compound | R.Time | Height           | Area              | Area%           | Conc.           | Type |
|---------------|----------|--------|------------------|-------------------|-----------------|-----------------|------|
| 1             |          | 6.870  | 1696874.0        | 18188586.2        | 49.3483         | 49.3483         | + BB |
| 2             |          | 8.357  | 1432465.3        | 18668953.6        | 50.6517         | 50.6517         | + BB |
| <b>Total:</b> |          |        | <b>3129339.3</b> | <b>36857539.9</b> | <b>100.0000</b> | <b>100.0000</b> |      |

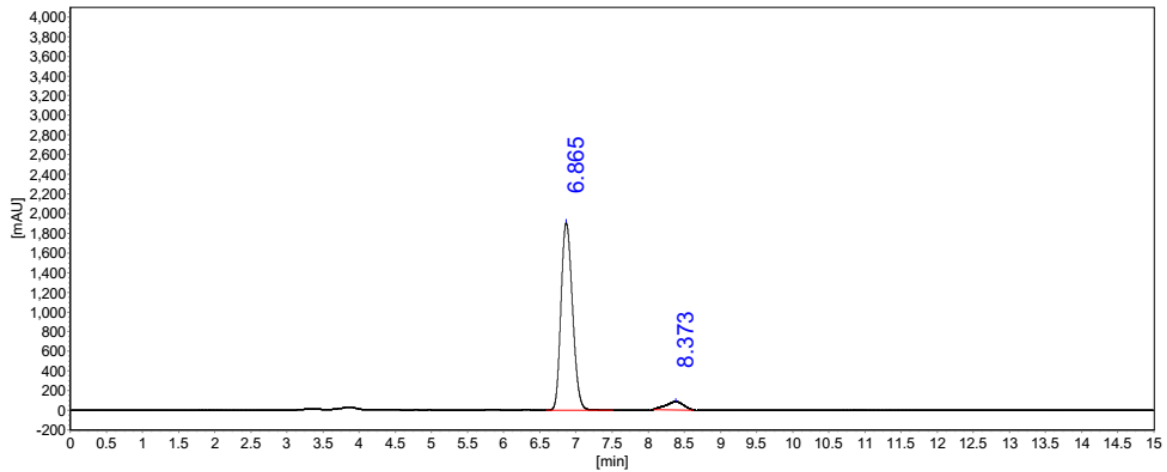

### Analysis Results

| No.           | Compound | R.Time | Height           | Area              | Area%           | Conc.           | Type |
|---------------|----------|--------|------------------|-------------------|-----------------|-----------------|------|
| 1             |          | 6.865  | 1906000.4        | 21120700.0        | 94.8496         | 94.8496         | + BB |
| 2             |          | 8.373  | 114515.2         | 1146864.6         | 5.1504          | 5.1504          | + BB |
| <b>Total:</b> |          |        | <b>2020515.6</b> | <b>22267564.6</b> | <b>100.0000</b> | <b>100.0000</b> |      |

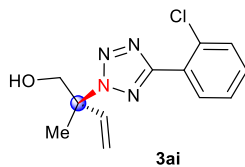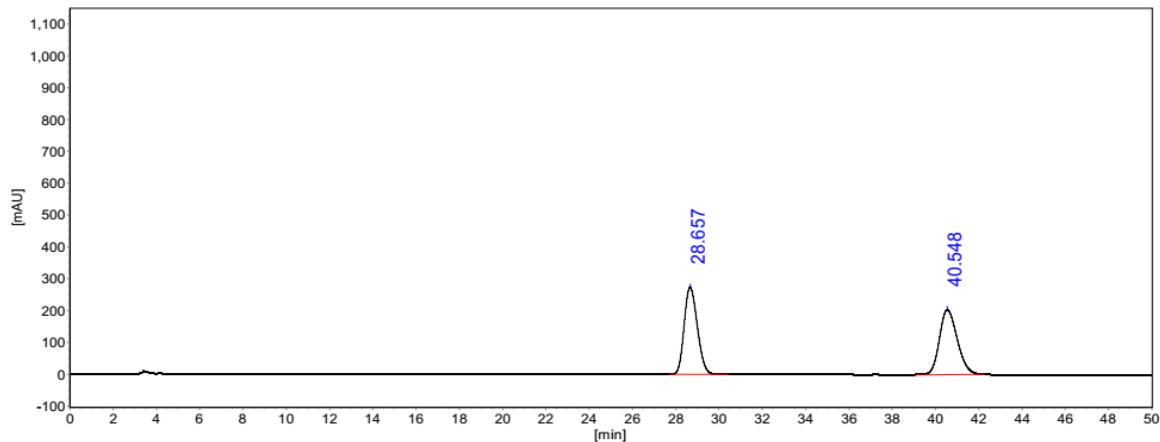

### Analysis Results

| No.           | Compound | R.Time | Height          | Area              | Area%           | Conc.           | Type |
|---------------|----------|--------|-----------------|-------------------|-----------------|-----------------|------|
| 1             |          | 28.657 | 273846.7        | 11600505.2        | 49.9166         | 49.9166         | + BB |
| 2             |          | 40.548 | 203712.7        | 11639276.6        | 50.0834         | 50.0834         | + BB |
| <b>Total:</b> |          |        | <b>477559.4</b> | <b>23239781.9</b> | <b>100.0000</b> | <b>100.0000</b> |      |

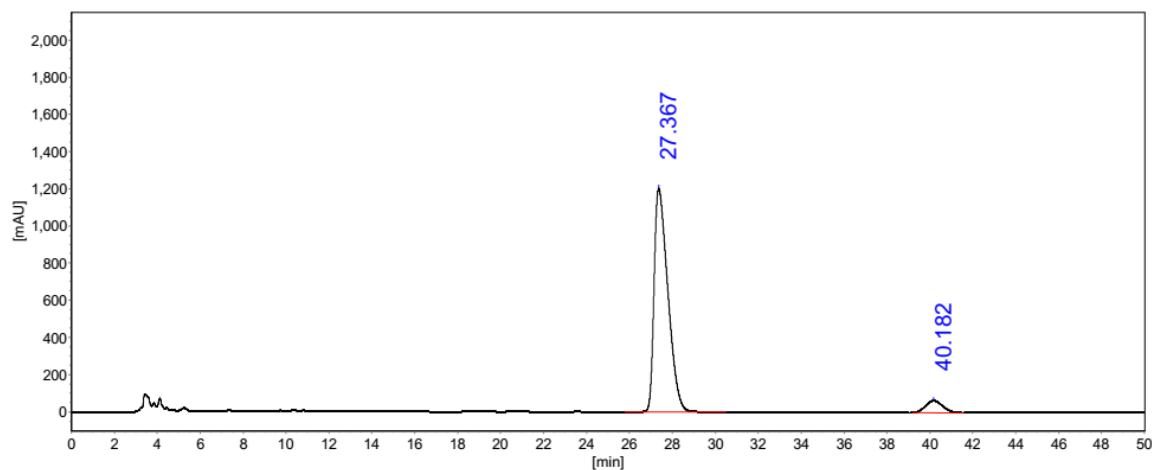

### Analysis Results

| No.           | Compound | R.Time | Height           | Area              | Area%           | Conc.           | Type |
|---------------|----------|--------|------------------|-------------------|-----------------|-----------------|------|
| 1             |          | 27.367 | 1202503.8        | 53365624.3        | 93.5741         | 93.5741         | + BB |
| 2             |          | 40.182 | 65298.9          | 3664741.8         | 6.4259          | 6.4259          | + BB |
| <b>Total:</b> |          |        | <b>1267802.7</b> | <b>57030366.2</b> | <b>100.0000</b> | <b>100.0000</b> |      |

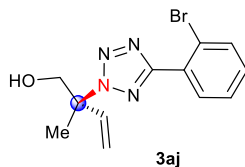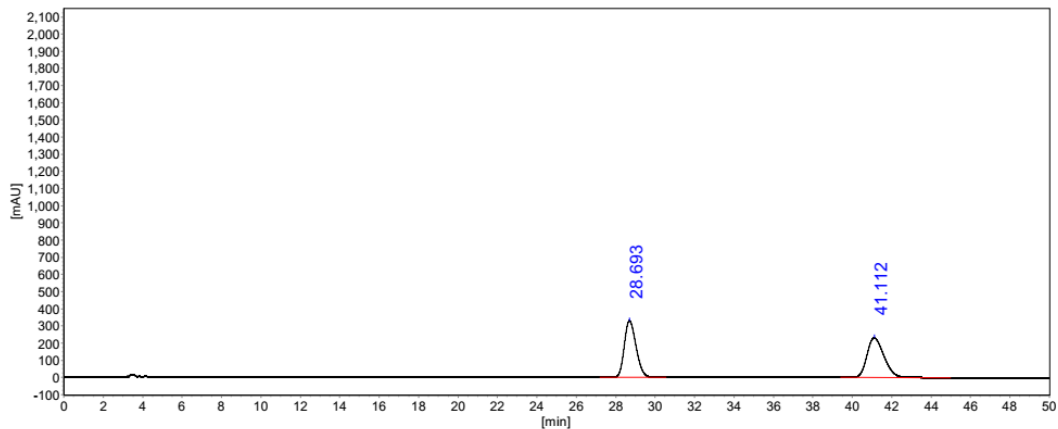

### Analysis Results

| No.           | Compound | R.Time | Height          | Area              | Area%           | Conc.           | Type |
|---------------|----------|--------|-----------------|-------------------|-----------------|-----------------|------|
| 1             |          | 28.693 | 330858.0        | 13754039.7        | 49.8698         | 49.8698         | + BB |
| 2             |          | 41.112 | 231787.7        | 13825849.4        | 50.1302         | 50.1302         | + BB |
| <b>Total:</b> |          |        | <b>562645.7</b> | <b>27579889.2</b> | <b>100.0000</b> | <b>100.0000</b> |      |

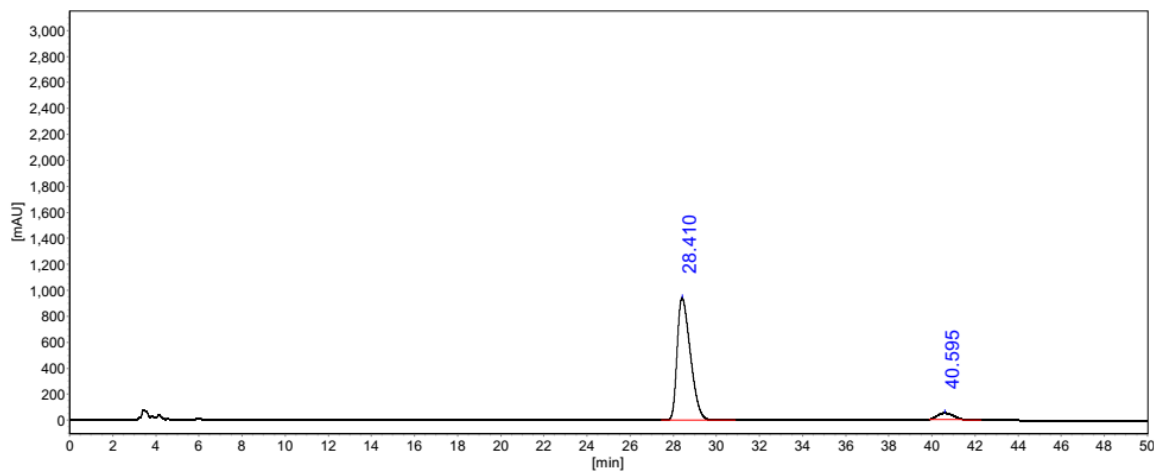

### Analysis Results

| No.           | Compound | R.Time | Height          | Area              | Area%           | Conc.           | Type |
|---------------|----------|--------|-----------------|-------------------|-----------------|-----------------|------|
| 1             |          | 28.410 | 942911.2        | 40130869.3        | 93.8842         | 93.8842         | + BB |
| 2             |          | 40.595 | 50042.8         | 2614195.3         | 6.1158          | 6.1158          | + BB |
| <b>Total:</b> |          |        | <b>992954.0</b> | <b>42745064.6</b> | <b>100.0000</b> | <b>100.0000</b> |      |



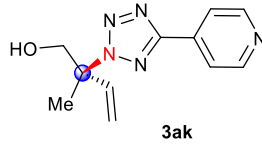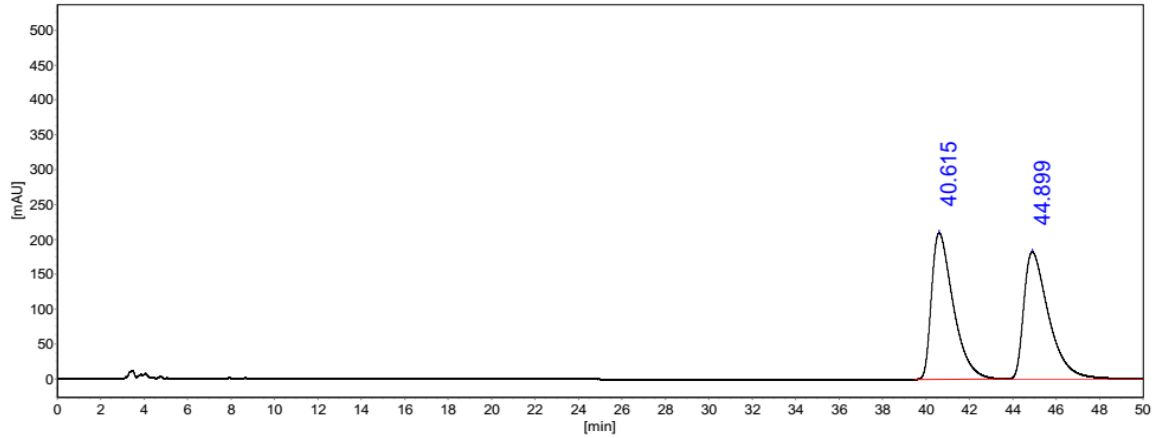

### Analysis Results

| No.           | Compound | R.Time | Height          | Area              | Area%           | Conc.           | Type |
|---------------|----------|--------|-----------------|-------------------|-----------------|-----------------|------|
| 1             |          | 40.615 | 210411.8        | 14670000.9        | 50.1140         | 50.1140         | VV   |
| 2             |          | 44.899 | 182771.0        | 14603251.3        | 49.8860         | 49.8860         | VB   |
| <b>Total:</b> |          |        | <b>393182.8</b> | <b>29273252.2</b> | <b>100.0000</b> | <b>100.0000</b> |      |

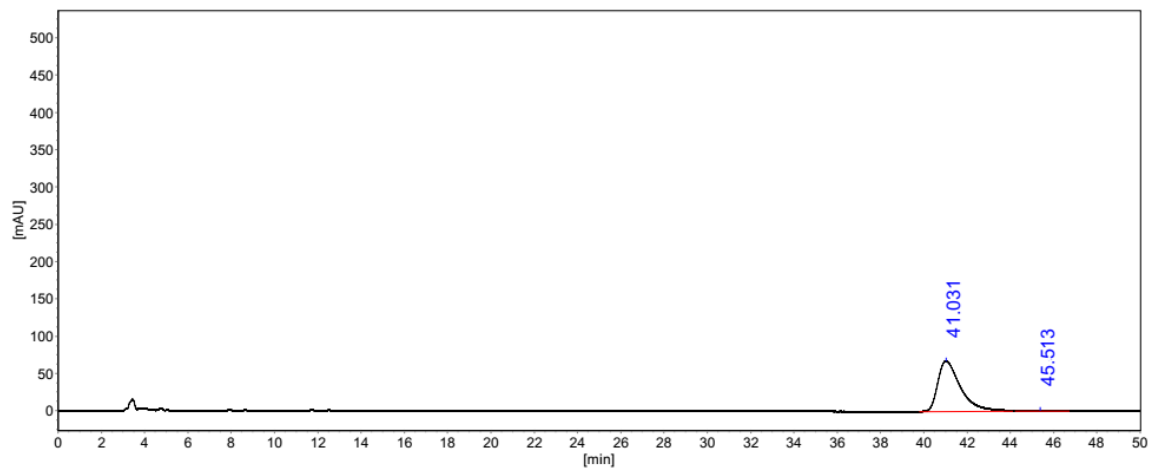

### Analysis Results

| No.           | Compound | R.Time | Height         | Area             | Area%           | Conc.           | Type |
|---------------|----------|--------|----------------|------------------|-----------------|-----------------|------|
| 1             |          | 41.031 | 67620.0        | 4932396.6        | 98.9238         | 98.9238         | + BB |
| 2             |          | 45.513 | 639.5          | 53657.9          | 1.0762          | 1.0762          | + BB |
| <b>Total:</b> |          |        | <b>68259.5</b> | <b>4986054.5</b> | <b>100.0000</b> | <b>100.0000</b> |      |

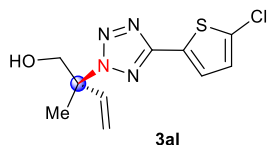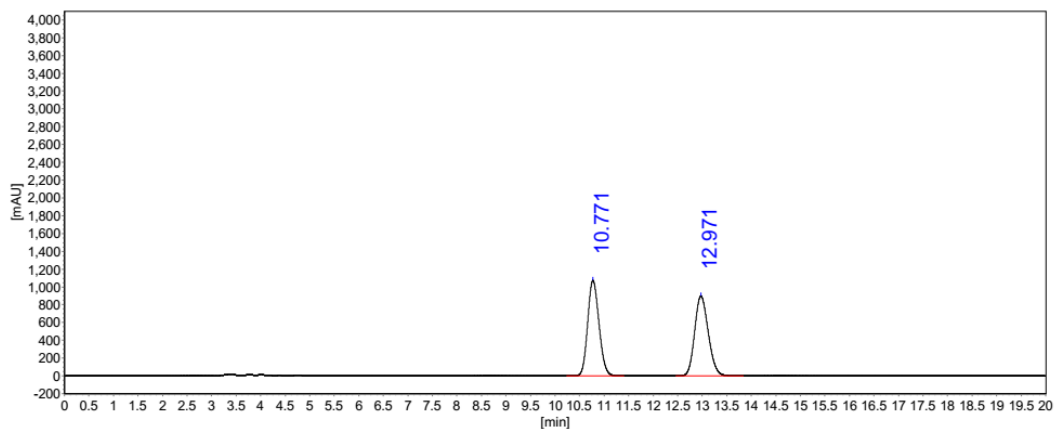

### Analysis Results

| No.           | Compound | R.Time | Height           | Area              | Area%           | Conc.           | Type |
|---------------|----------|--------|------------------|-------------------|-----------------|-----------------|------|
| 1             |          | 10.771 | 1073529.5        | 17207728.1        | 49.9149         | 49.9149         | + BB |
| 2             |          | 12.971 | 897082.1         | 17266371.8        | 50.0851         | 50.0851         | + BB |
| <b>Total:</b> |          |        | <b>1970611.6</b> | <b>34474099.9</b> | <b>100.0000</b> | <b>100.0000</b> |      |

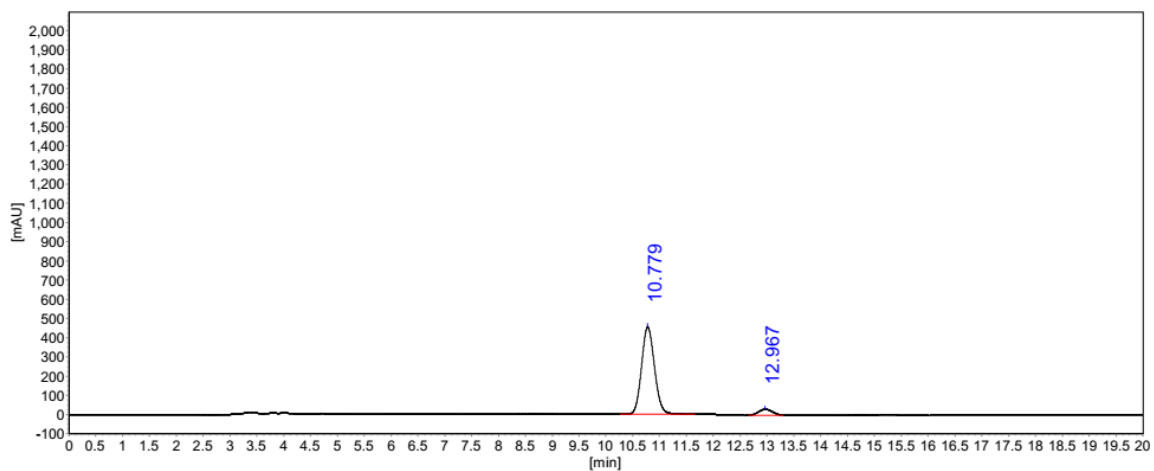

### Analysis Results

| No.           | Compound | R.Time | Height          | Area             | Area%           | Conc.           | Type |
|---------------|----------|--------|-----------------|------------------|-----------------|-----------------|------|
| 1             |          | 10.779 | 455405.1        | 7652329.6        | 92.9545         | 92.9545         | + BB |
| 2             |          | 12.967 | 31932.6         | 580009.2         | 7.0455          | 7.0455          | + BB |
| <b>Total:</b> |          |        | <b>487337.7</b> | <b>8232338.8</b> | <b>100.0000</b> | <b>100.0000</b> |      |

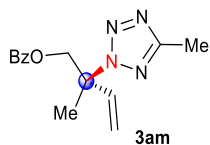

Comment:

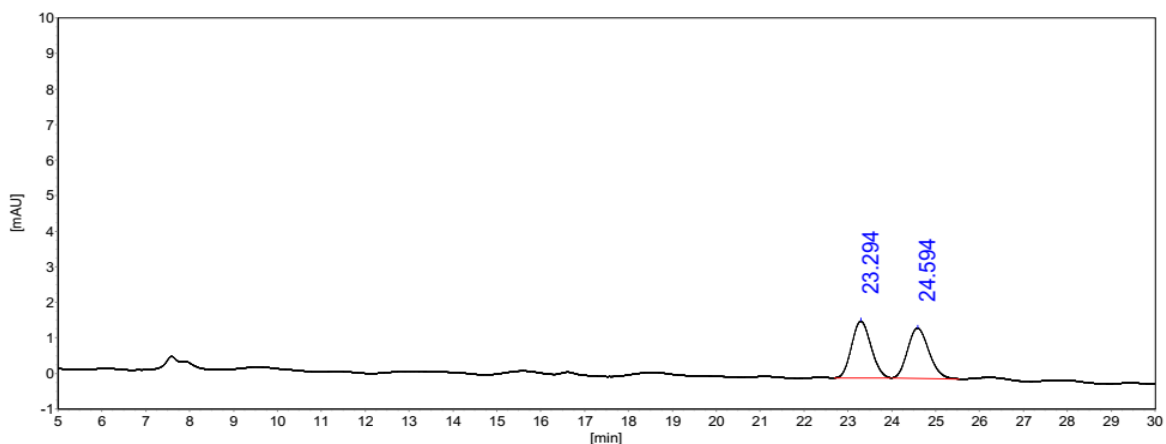

### Analysis Results

| No.           | Compound | R.Time | Height        | Area           | Area%           | Conc.           | Type |
|---------------|----------|--------|---------------|----------------|-----------------|-----------------|------|
| 1             |          | 23.294 | 1593.7        | 49168.0        | 50.9182         | 50.9182         | + BB |
| 2             |          | 24.594 | 1412.5        | 47394.8        | 49.0818         | 49.0818         | + BB |
| <b>Total:</b> |          |        | <b>3006.2</b> | <b>96562.8</b> | <b>100.0000</b> | <b>100.0000</b> |      |

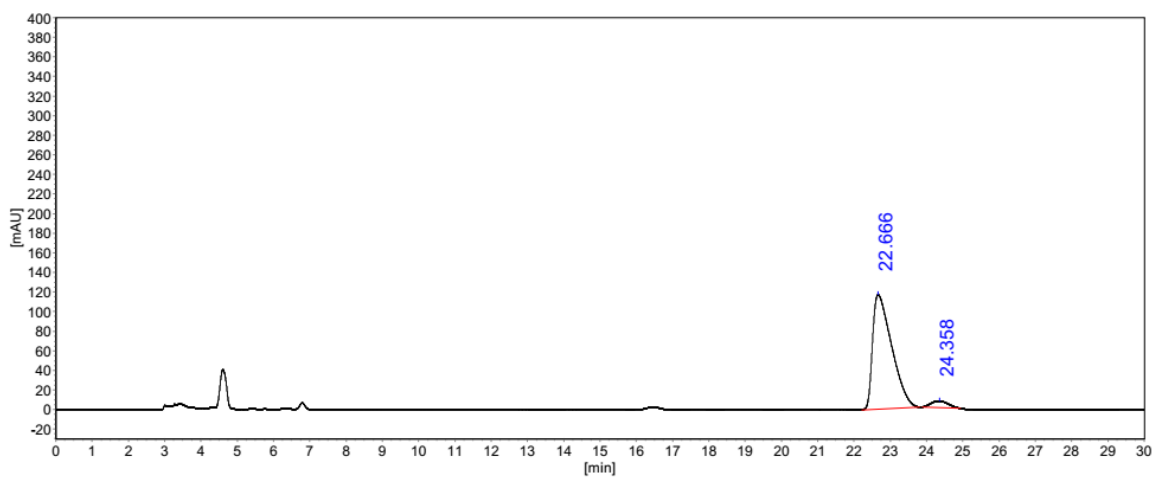

### Analysis Results

| No.           | Compound | R.Time | Height          | Area             | Area%           | Conc.           | Type |
|---------------|----------|--------|-----------------|------------------|-----------------|-----------------|------|
| 1             |          | 22.666 | 116763.1        | 4276674.8        | 94.9100         | 94.9100         | + BB |
| 2             |          | 24.358 | 6938.7          | 229358.5         | 5.0900          | 5.0900          | + BB |
| <b>Total:</b> |          |        | <b>123701.8</b> | <b>4506033.3</b> | <b>100.0000</b> | <b>100.0000</b> |      |

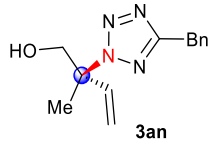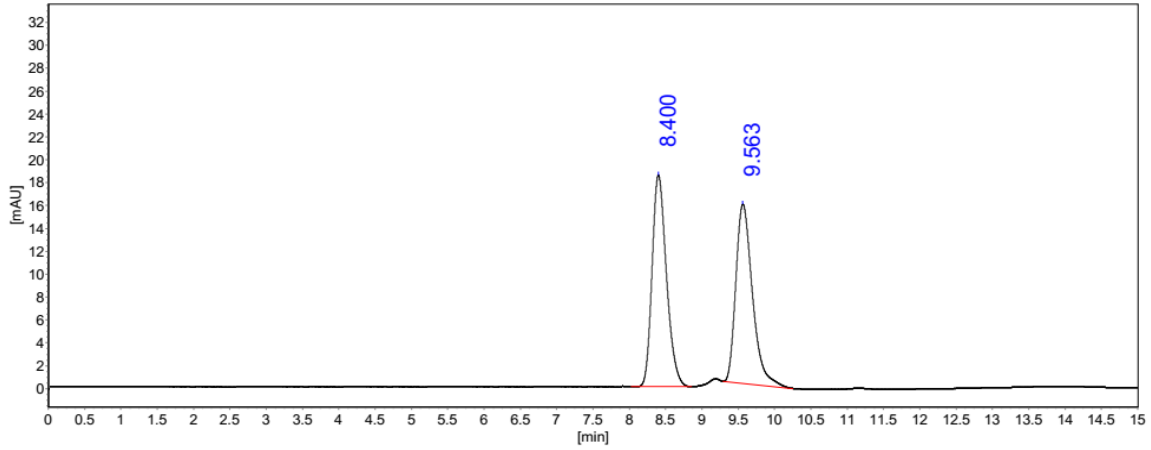

### Analysis Results

| No.           | Compound | R.Time | Height         | Area            | Area%           | Conc.           | Type |
|---------------|----------|--------|----------------|-----------------|-----------------|-----------------|------|
| 1             |          | 8.400  | 18506.3        | 254981.4        | 50.5312         | 50.5312         | + BB |
| 2             |          | 9.563  | 15670.9        | 249620.2        | 49.4688         | 49.4688         | + BB |
| <b>Total:</b> |          |        | <b>34177.2</b> | <b>504601.5</b> | <b>100.0000</b> | <b>100.0000</b> |      |

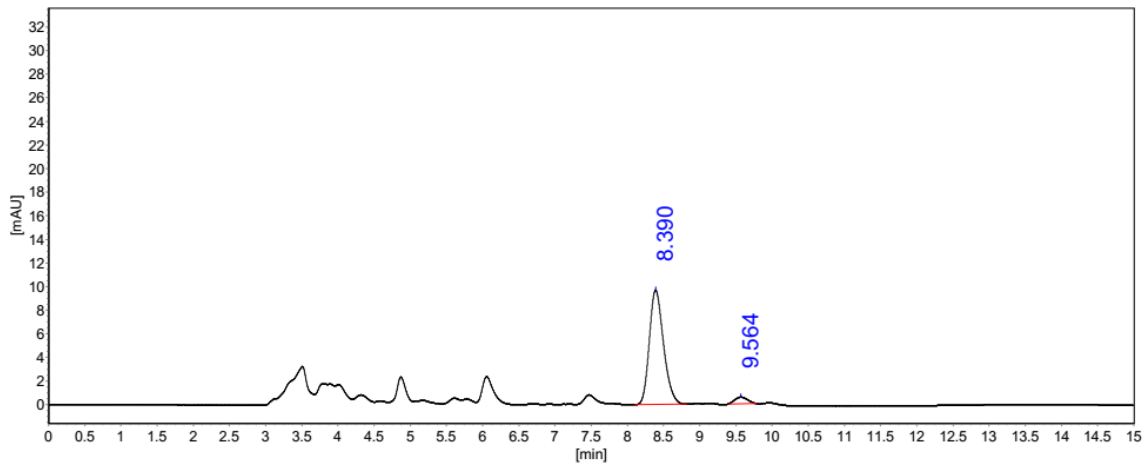

### Analysis Results

| No.           | Compound | R.Time | Height         | Area            | Area%           | Conc.           | Type |
|---------------|----------|--------|----------------|-----------------|-----------------|-----------------|------|
| 1             |          | 8.390  | 9713.8         | 132533.4        | 95.0327         | 95.0327         | + BB |
| 2             |          | 9.564  | 561.0          | 6927.4          | 4.9673          | 4.9673          | + BB |
| <b>Total:</b> |          |        | <b>10274.8</b> | <b>139460.8</b> | <b>100.0000</b> | <b>100.0000</b> |      |

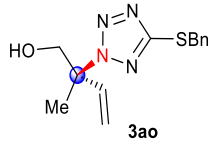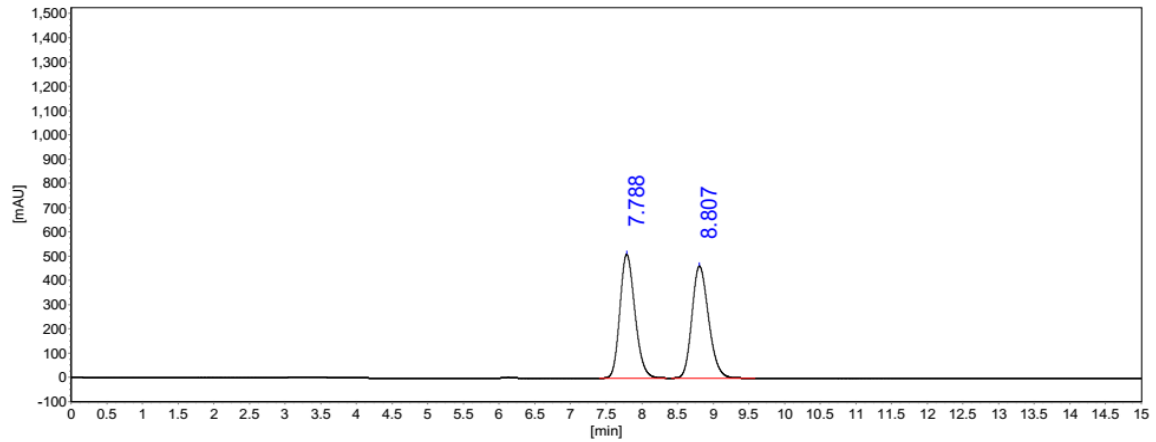

### Analysis Results

| No.           | Compound | R.Time | Height          | Area              | Area%           | Conc.           | Type |
|---------------|----------|--------|-----------------|-------------------|-----------------|-----------------|------|
| 1             |          | 7.788  | 510550.3        | 7480254.6         | 49.9955         | 49.9955         | + BB |
| 2             |          | 8.807  | 462128.0        | 7481589.4         | 50.0045         | 50.0045         | + BB |
| <b>Total:</b> |          |        | <b>972678.3</b> | <b>14961843.9</b> | <b>100.0000</b> | <b>100.0000</b> |      |

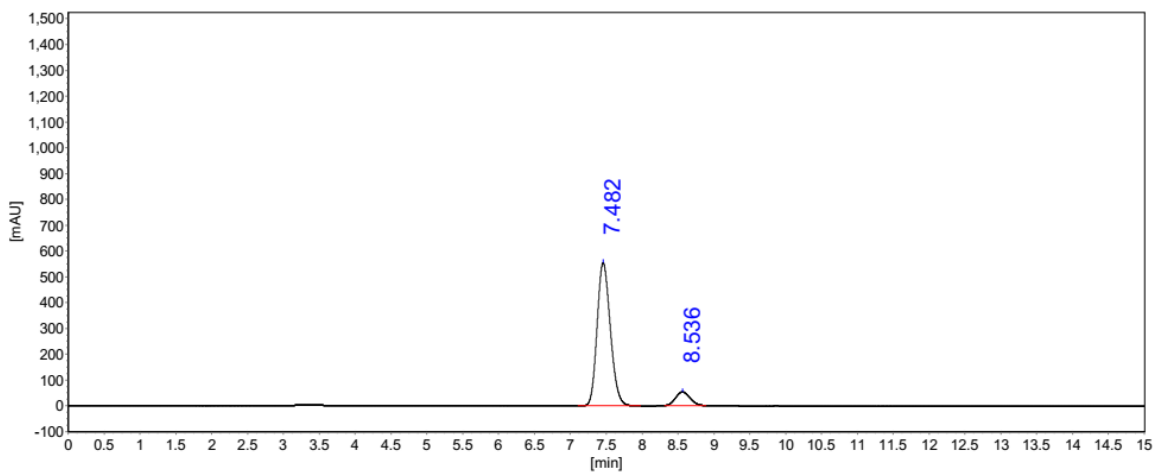

### Analysis Results

| No.           | Compound | R.Time | Height          | Area             | Area%           | Conc.           | Type |
|---------------|----------|--------|-----------------|------------------|-----------------|-----------------|------|
| 1             |          | 7.482  | 554583.3        | 7119339.1        | 90.4468         | 90.4468         | + BB |
| 2             |          | 8.536  | 53325.6         | 751962.7         | 9.5532          | 9.5532          | + BB |
| <b>Total:</b> |          |        | <b>607908.9</b> | <b>7871301.8</b> | <b>100.0000</b> | <b>100.0000</b> |      |

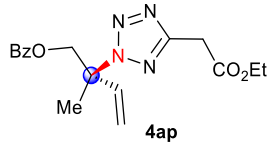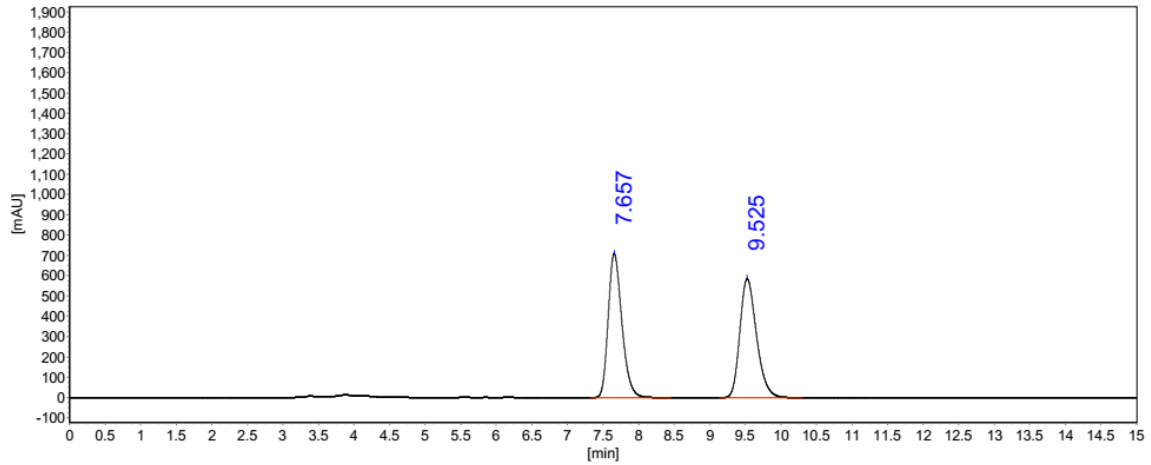

### Analysis Results

| No.           | Compound | R.Time | Height           | Area              | Area%           | Conc.           | Type |
|---------------|----------|--------|------------------|-------------------|-----------------|-----------------|------|
| 1             |          | 7.657  | 709900.8         | 9500771.3         | 49.9121         | 49.9121         | + BB |
| 2             |          | 9.525  | 586475.7         | 9534221.5         | 50.0879         | 50.0879         | + BB |
| <b>Total:</b> |          |        | <b>1296376.5</b> | <b>19034992.9</b> | <b>100.0000</b> | <b>100.0000</b> |      |

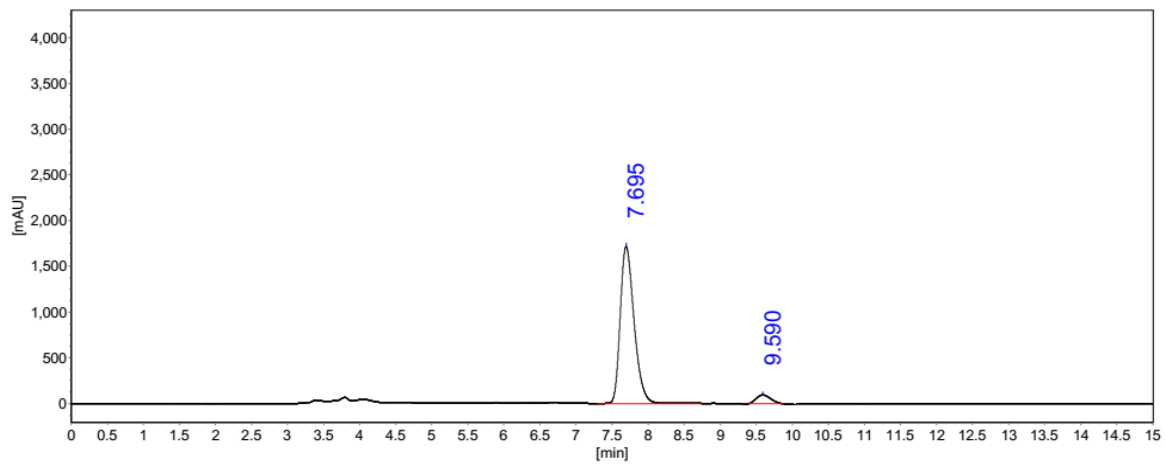

### Analysis Results

| No.           | Compound | R.Time | Height           | Area              | Area%           | Conc.           | Type |
|---------------|----------|--------|------------------|-------------------|-----------------|-----------------|------|
| 1             |          | 7.695  | 1715841.2        | 22824736.0        | 94.4201         | 94.4201         | + BB |
| 2             |          | 9.590  | 96398.9          | 1348871.6         | 5.5799          | 5.5799          | + BB |
| <b>Total:</b> |          |        | <b>1812240.1</b> | <b>24173607.6</b> | <b>100.0000</b> | <b>100.0000</b> |      |

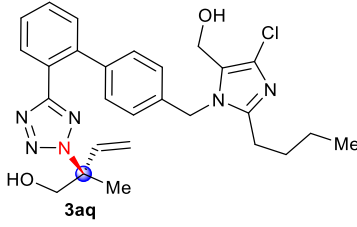

Comment:

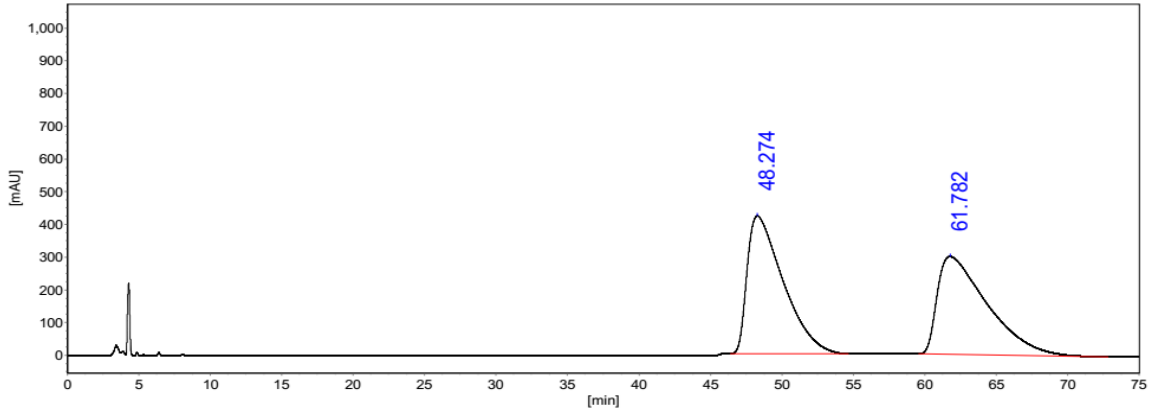

### Analysis Results

| No.           | Compound | R.Time | Height          | Area               | Area%           | Conc.           | Type |
|---------------|----------|--------|-----------------|--------------------|-----------------|-----------------|------|
| 1             |          | 48.274 | 421129.7        | 73767610.9         | 50.3857         | 50.3857         | + BB |
| 2             |          | 61.782 | 298646.2        | 72638123.5         | 49.6143         | 49.6143         | + BB |
| <b>Total:</b> |          |        | <b>719775.9</b> | <b>146405734.4</b> | <b>100.0000</b> | <b>100.0000</b> |      |

Comment:

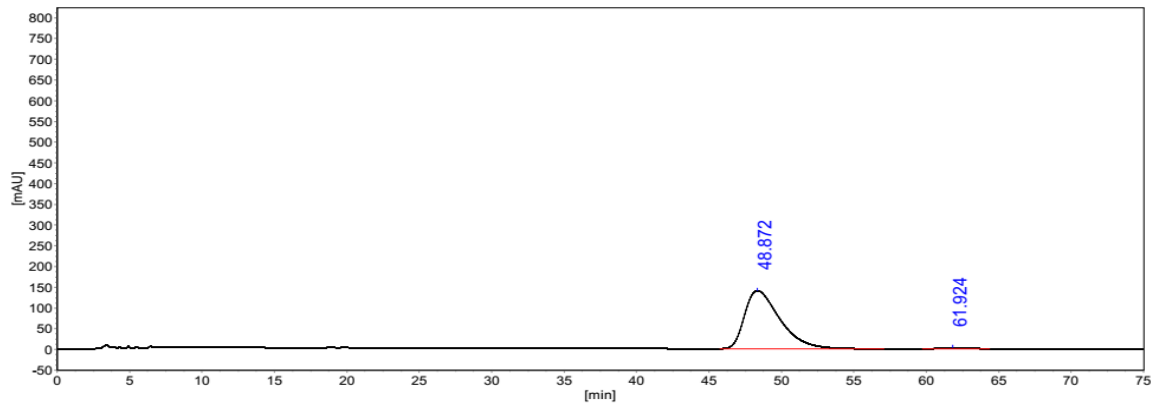

### Analysis Results

| No.           | Compound | R.Time | Height          | Area              | Area%           | Conc.           | Type |
|---------------|----------|--------|-----------------|-------------------|-----------------|-----------------|------|
| 1             |          | 48.872 | 139987.8        | 23789859.2        | 98.5715         | 98.5715         | + BB |
| 2             |          | 61.924 | 2142.9          | 344770.2          | 1.4285          | 1.4285          | + BB |
| <b>Total:</b> |          |        | <b>142130.7</b> | <b>24134629.4</b> | <b>100.0000</b> | <b>100.0000</b> |      |

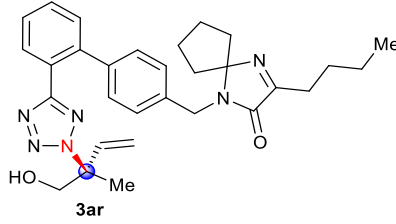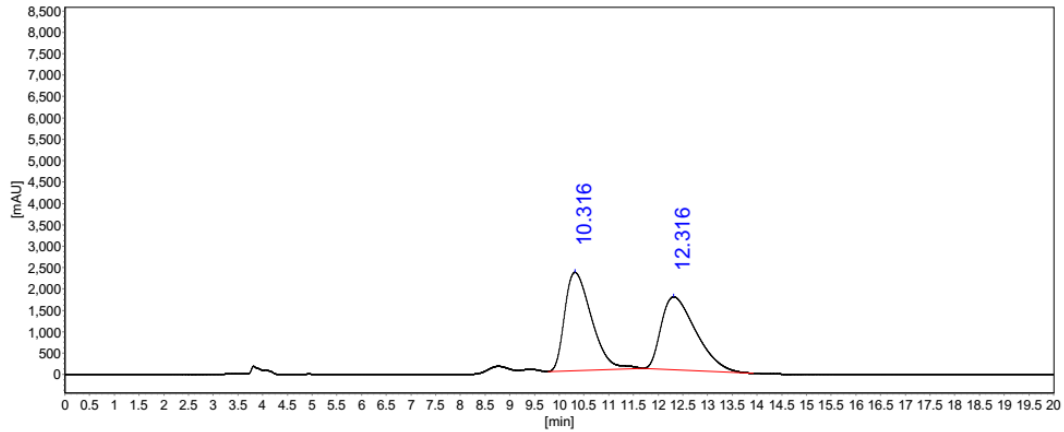

### Analysis Results

| No.           | Compound | R.Time | Height           | Area               | Area%           | Conc.           | Type |
|---------------|----------|--------|------------------|--------------------|-----------------|-----------------|------|
| 1             |          | 10.316 | 2295601.6        | 86586051.0         | 51.0571         | 51.0571         | + BB |
| 2             |          | 12.316 | 1701760.4        | 83000795.0         | 48.9429         | 48.9429         | + BB |
| <b>Total:</b> |          |        | <b>3997362.0</b> | <b>169586846.0</b> | <b>100.0000</b> | <b>100.0000</b> |      |

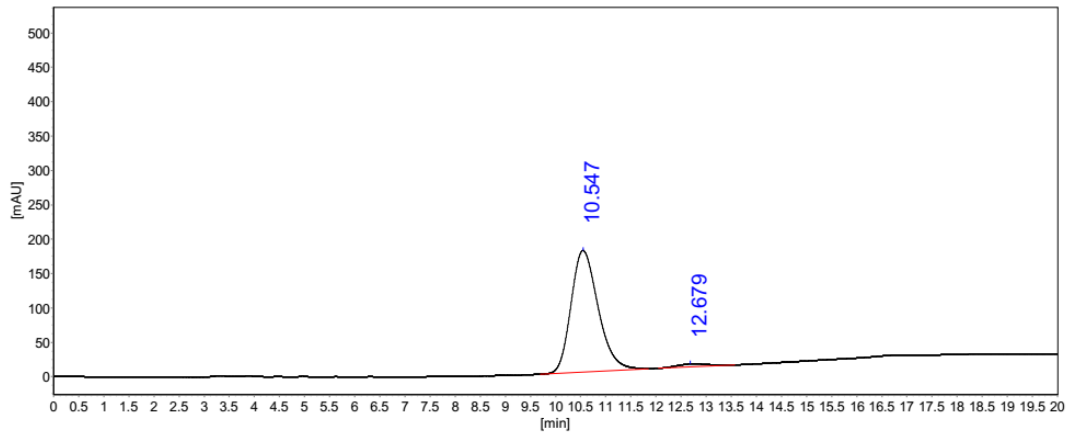

### Analysis Results

| No.           | Compound | R.Time | Height          | Area             | Area%           | Conc.           | Type |
|---------------|----------|--------|-----------------|------------------|-----------------|-----------------|------|
| 1             |          | 10.547 | 176776.3        | 6635581.9        | 97.3876         | 97.3876         | + BB |
| 2             |          | 12.679 | 4204.4          | 177998.4         | 2.6124          | 2.6124          | + BB |
| <b>Total:</b> |          |        | <b>180980.7</b> | <b>6813580.3</b> | <b>100.0000</b> | <b>100.0000</b> |      |



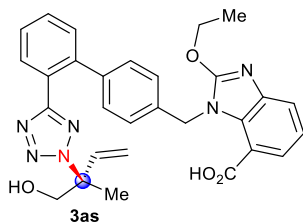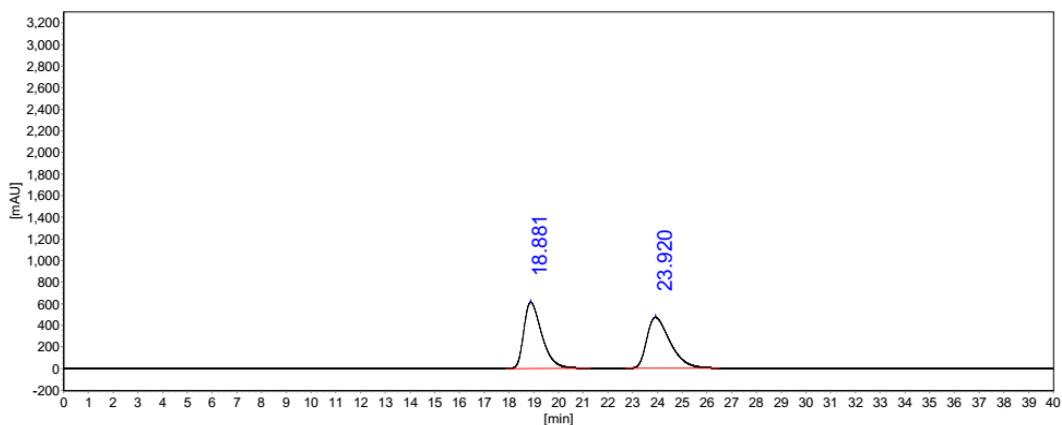

### Analysis Results

| No.           | Compound | R.Time | Height           | Area              | Area%           | Conc.           | Type |
|---------------|----------|--------|------------------|-------------------|-----------------|-----------------|------|
| 1             |          | 18.881 | 612945.8         | 30999556.6        | 50.0782         | 50.0782         | + BB |
| 2             |          | 23.920 | 471712.5         | 30902756.3        | 49.9218         | 49.9218         | + BB |
| <b>Total:</b> |          |        | <b>1084658.3</b> | <b>61902313.0</b> | <b>100.0000</b> | <b>100.0000</b> |      |

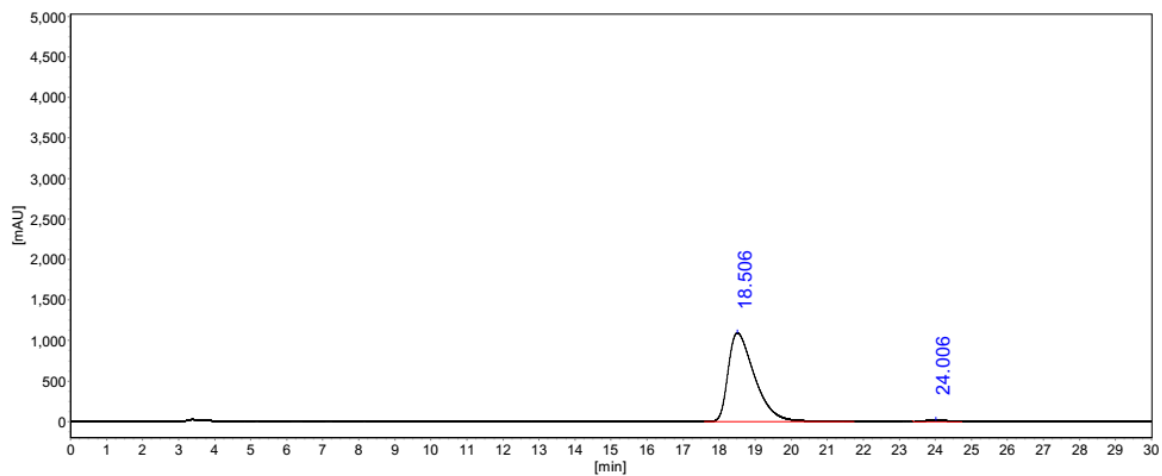

### Analysis Results

| No.           | Compound | R.Time | Height           | Area              | Area%           | Conc.           | Type |
|---------------|----------|--------|------------------|-------------------|-----------------|-----------------|------|
| 1             |          | 18.506 | 1093737.6        | 55264062.7        | 98.0291         | 98.0291         | + BB |
| 2             |          | 24.006 | 22608.3          | 1111121.5         | 1.9709          | 1.9709          | + BB |
| <b>Total:</b> |          |        | <b>1116345.9</b> | <b>56375184.1</b> | <b>100.0000</b> | <b>100.0000</b> |      |

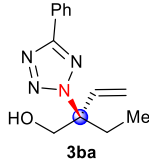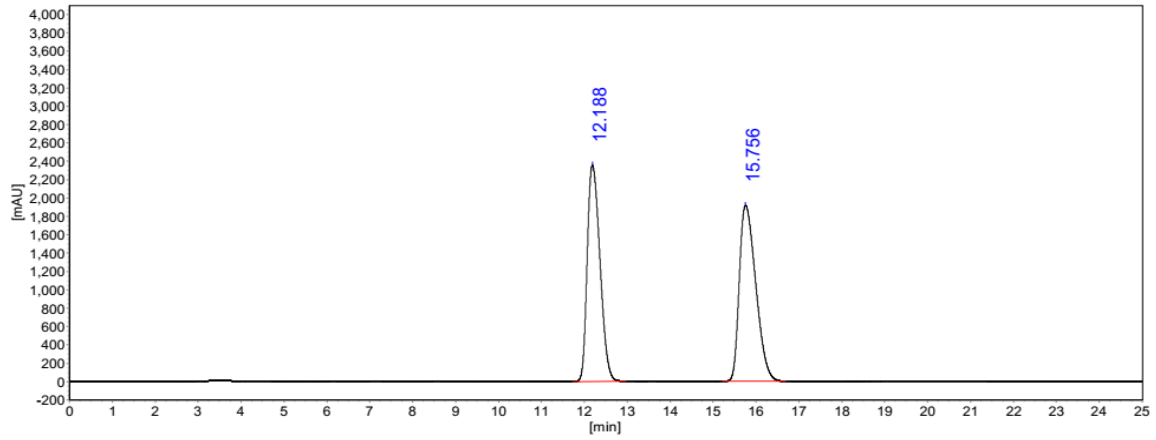

### Analysis Results

| No.           | Compound | R.Time | Height           | Area              | Area%           | Conc.           | Type |
|---------------|----------|--------|------------------|-------------------|-----------------|-----------------|------|
| 1             |          | 12.188 | 2355267.6        | 48494692.8        | 48.6928         | 48.6928         | + BB |
| 2             |          | 15.756 | 1919070.0        | 51098551.6        | 51.3072         | 51.3072         | + BB |
| <b>Total:</b> |          |        | <b>4274337.6</b> | <b>99593244.4</b> | <b>100.0000</b> | <b>100.0000</b> |      |

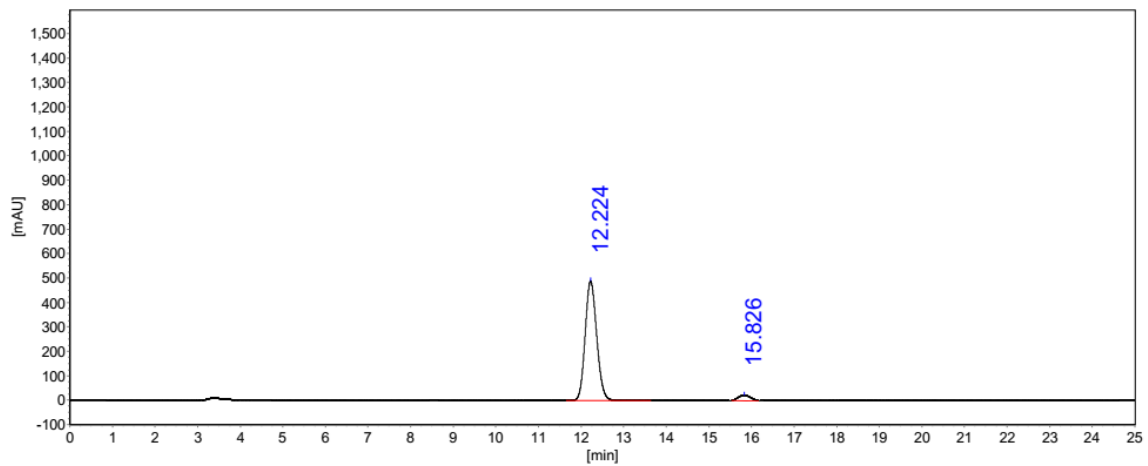

### Analysis Results

| No.           | Compound | R.Time | Height          | Area             | Area%           | Conc.           | Type |
|---------------|----------|--------|-----------------|------------------|-----------------|-----------------|------|
| 1             |          | 12.224 | 488613.4        | 9187976.9        | 95.1228         | 95.1228         | + BB |
| 2             |          | 15.826 | 23023.3         | 471097.0         | 4.8772          | 4.8772          | + BB |
| <b>Total:</b> |          |        | <b>511636.7</b> | <b>9659073.9</b> | <b>100.0000</b> | <b>100.0000</b> |      |

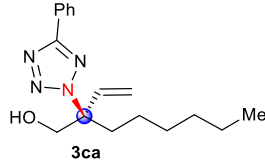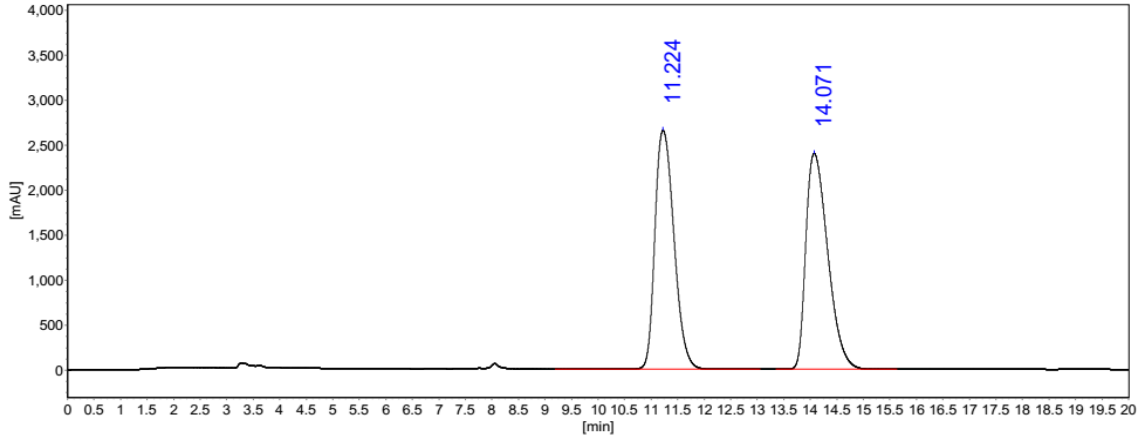

### Analysis Results

| No.           | Compound | R.Time | Height           | Area               | Area%           | Conc.           | Type |
|---------------|----------|--------|------------------|--------------------|-----------------|-----------------|------|
| 1             |          | 11.224 | 2656740.4        | 66485128.1         | 49.1014         | 49.1014         | + BB |
| 2             |          | 14.071 | 2399980.4        | 68918685.1         | 50.8986         | 50.8986         | + BB |
| <b>Total:</b> |          |        | <b>5056720.8</b> | <b>135403813.2</b> | <b>100.0000</b> | <b>100.0000</b> |      |

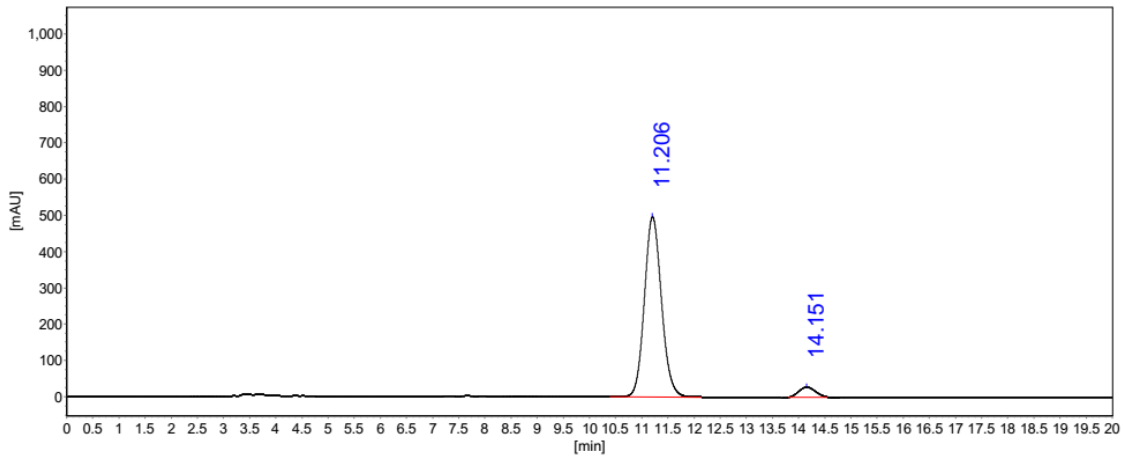

### Analysis Results

| No.           | Compound | R.Time | Height          | Area              | Area%           | Conc.           | Type |
|---------------|----------|--------|-----------------|-------------------|-----------------|-----------------|------|
| 1             |          | 11.206 | 497352.6        | 11300276.5        | 94.7954         | 94.7954         | + BB |
| 2             |          | 14.151 | 27929.7         | 620427.9          | 5.2046          | 5.2046          | + BB |
| <b>Total:</b> |          |        | <b>525282.3</b> | <b>11920704.4</b> | <b>100.0000</b> | <b>100.0000</b> |      |

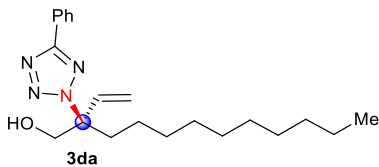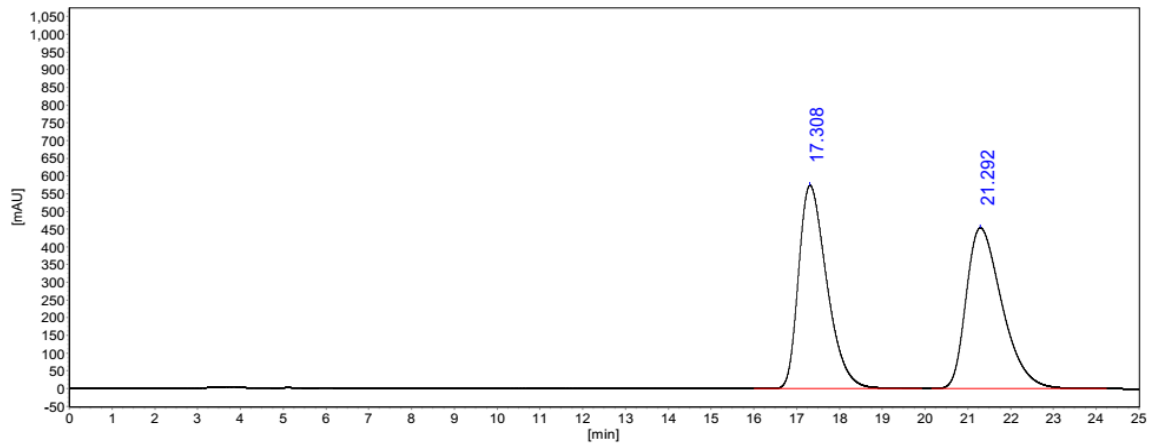

### Analysis Results

| No.           | Compound | R.Time | Height           | Area              | Area%           | Conc.           | Type |
|---------------|----------|--------|------------------|-------------------|-----------------|-----------------|------|
| 1             |          | 17.308 | 573947.8         | 26343900.6        | 49.9351         | 49.9351         | + BB |
| 2             |          | 21.292 | 453984.5         | 26412335.4        | 50.0649         | 50.0649         | + BB |
| <b>Total:</b> |          |        | <b>1027932.3</b> | <b>52756236.0</b> | <b>100.0000</b> | <b>100.0000</b> |      |

Comment:

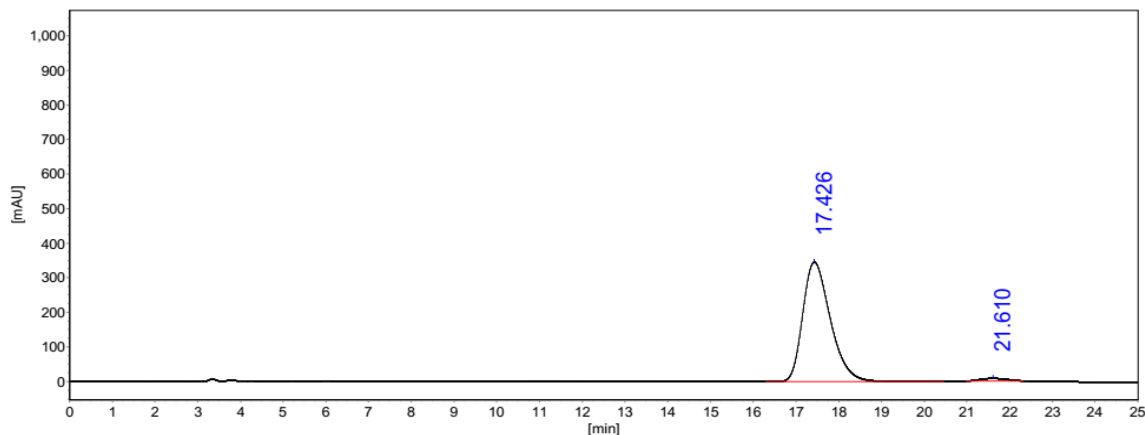

### Analysis Results

| No.           | Compound | R.Time | Height          | Area              | Area%           | Conc.           | Type |
|---------------|----------|--------|-----------------|-------------------|-----------------|-----------------|------|
| 1             |          | 17.426 | 346370.6        | 15615121.5        | 97.8218         | 97.8218         | + BB |
| 2             |          | 21.610 | 7868.5          | 347708.4          | 2.1782          | 2.1782          | + BB |
| <b>Total:</b> |          |        | <b>354239.1</b> | <b>15962829.9</b> | <b>100.0000</b> | <b>100.0000</b> |      |

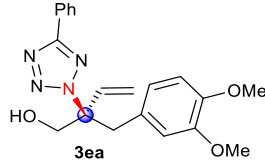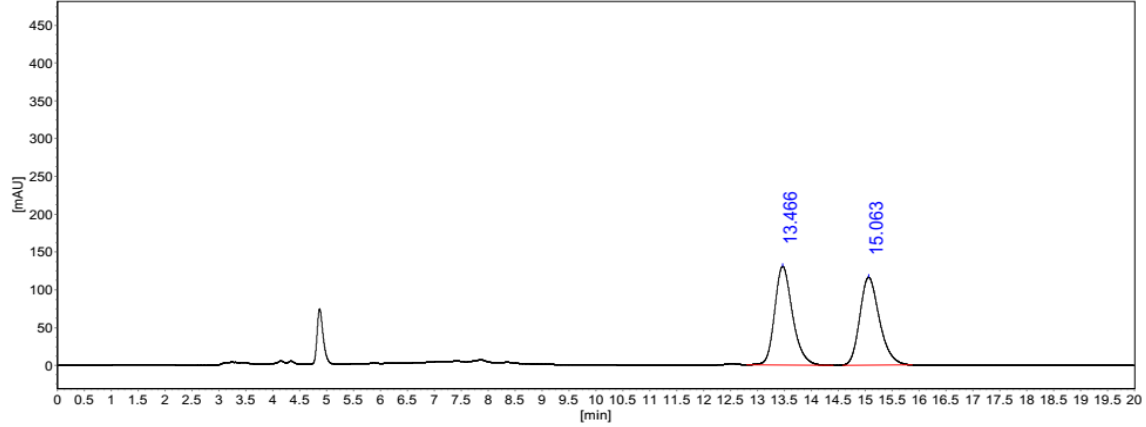

### Analysis Results

| No.           | Compound | R.Time | Height          | Area             | Area%           | Conc.           | Type |
|---------------|----------|--------|-----------------|------------------|-----------------|-----------------|------|
| 1             |          | 13.466 | 130668.6        | 3013683.3        | 50.4412         | 50.4412         | + BB |
| 2             |          | 15.063 | 116296.4        | 2960966.7        | 49.5588         | 49.5588         | + BB |
| <b>Total:</b> |          |        | <b>246965.0</b> | <b>5974649.9</b> | <b>100.0000</b> | <b>100.0000</b> |      |

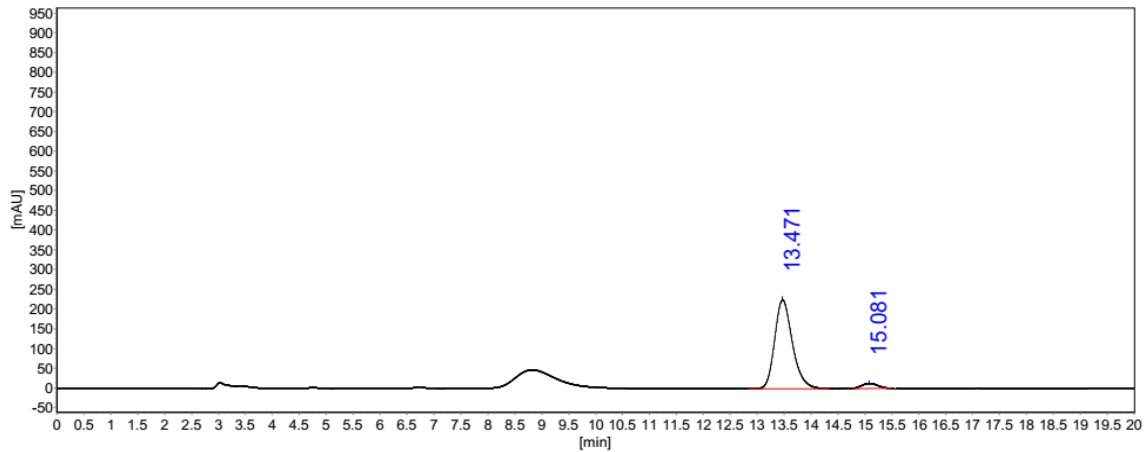

### Analysis Results

| No.           | Compound | R.Time | Height          | Area             | Area%           | Conc.           | Type |
|---------------|----------|--------|-----------------|------------------|-----------------|-----------------|------|
| 1             |          | 13.471 | 224910.0        | 5128582.1        | 95.0924         | 95.0924         | + BB |
| 2             |          | 15.081 | 12836.8         | 264678.5         | 4.9076          | 4.9076          | + BB |
| <b>Total:</b> |          |        | <b>237746.8</b> | <b>5393260.6</b> | <b>100.0000</b> | <b>100.0000</b> |      |

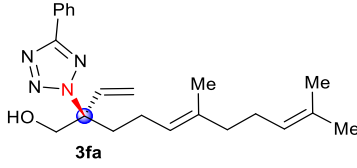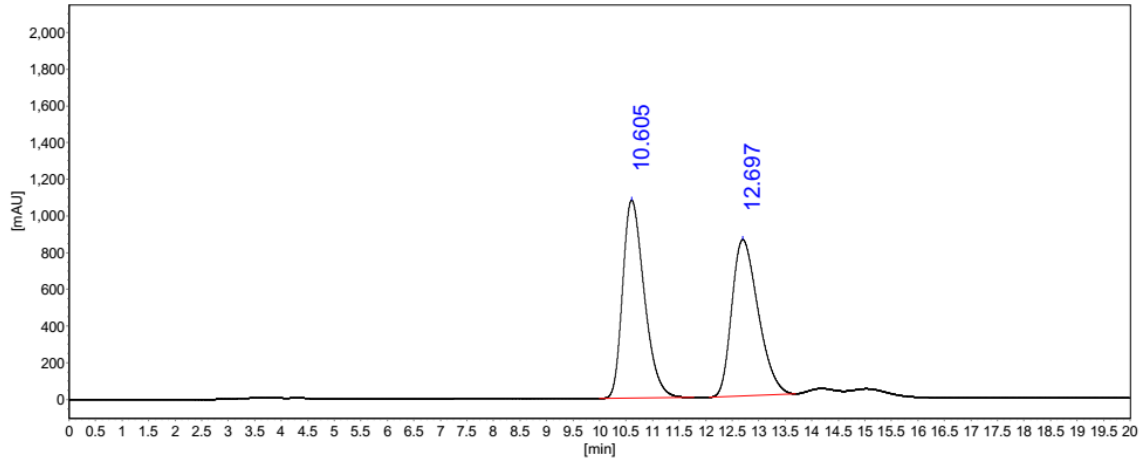

### Analysis Results

| No.           | Compound | R.Time | Height           | Area              | Area%           | Conc.           | Type |
|---------------|----------|--------|------------------|-------------------|-----------------|-----------------|------|
| 1             |          | 10.605 | 1079952.0        | 30557871.2        | 50.9046         | 50.9046         | + BB |
| 2             |          | 12.697 | 852109.3         | 29471773.3        | 49.0954         | 49.0954         | + BB |
| <b>Total:</b> |          |        | <b>1932061.3</b> | <b>60029644.5</b> | <b>100.0000</b> | <b>100.0000</b> |      |

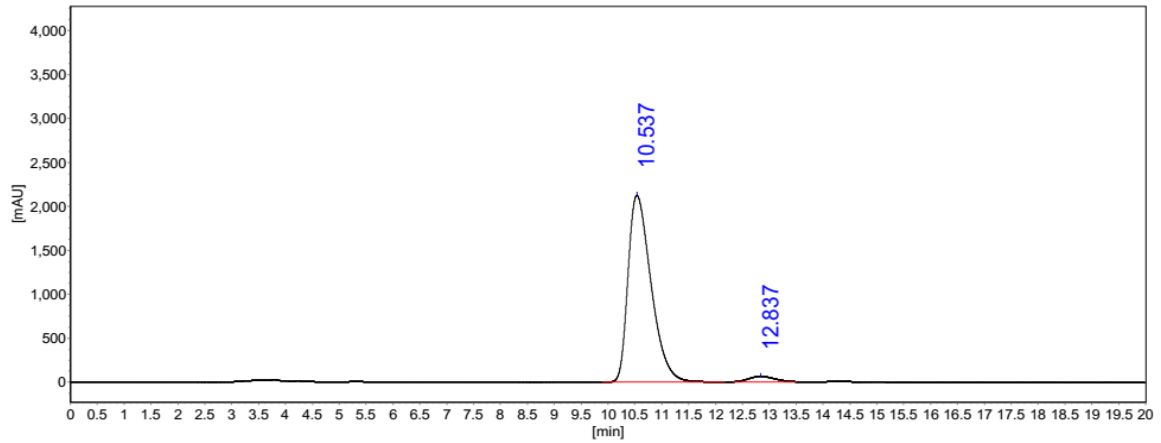

### Analysis Results

| No.           | Compound | R.Time | Height           | Area              | Area%           | Conc.           | Type |
|---------------|----------|--------|------------------|-------------------|-----------------|-----------------|------|
| 1             |          | 10.537 | 2126494.0        | 63318989.2        | 96.9006         | 96.9006         | + BB |
| 2             |          | 12.837 | 61528.9          | 2025303.2         | 3.0994          | 3.0994          | + BB |
| <b>Total:</b> |          |        | <b>2188022.9</b> | <b>65344292.4</b> | <b>100.0000</b> | <b>100.0000</b> |      |

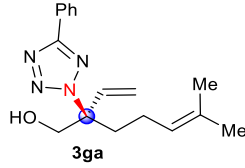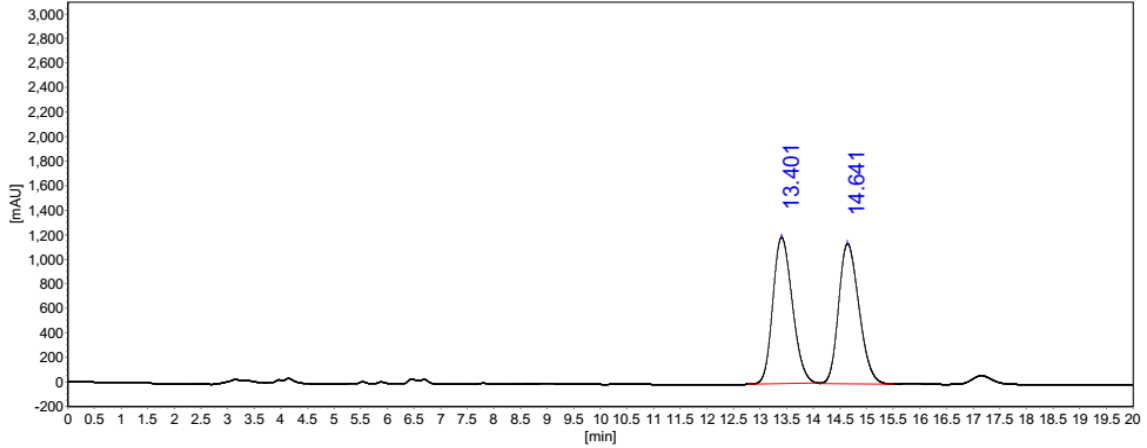

### Analysis Results

| No.           | Compound | R.Time | Height           | Area              | Area%           | Conc.           | Type |
|---------------|----------|--------|------------------|-------------------|-----------------|-----------------|------|
| 1             |          | 13.401 | 1194812.0        | 30445304.4        | 50.0459         | 50.0459         | + BB |
| 2             |          | 14.641 | 1141828.3        | 30389517.9        | 49.9541         | 49.9541         | + BB |
| <b>Total:</b> |          |        | <b>2336640.3</b> | <b>60834822.4</b> | <b>100.0000</b> | <b>100.0000</b> |      |

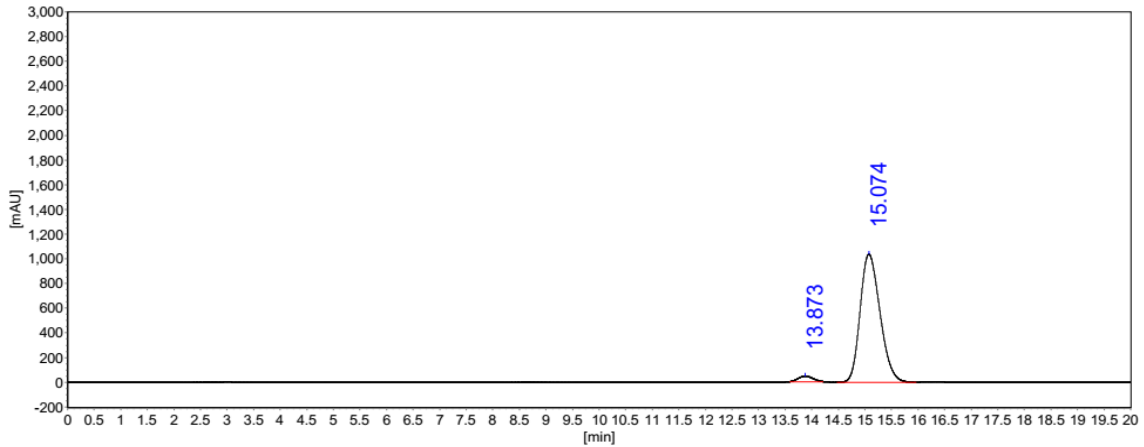

### Analysis Results

| No.           | Compound | R.Time | Height           | Area              | Area%           | Conc.           | Type |
|---------------|----------|--------|------------------|-------------------|-----------------|-----------------|------|
| 1             |          | 13.873 | 45218.6          | 868814.2          | 3.1188          | 3.1188          | + BB |
| 2             |          | 15.074 | 1037075.0        | 26988762.0        | 96.8812         | 96.8812         | + BB |
| <b>Total:</b> |          |        | <b>1082293.6</b> | <b>27857576.2</b> | <b>100.0000</b> | <b>100.0000</b> |      |

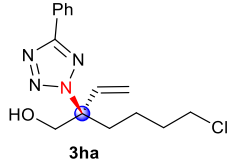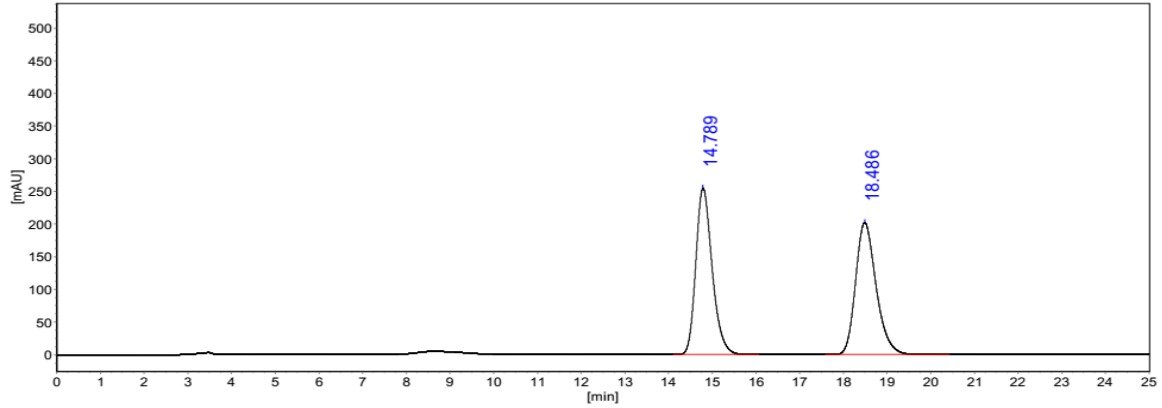

### Analysis Results

| No.           | Compound | R.Time | Height          | Area              | Area%           | Conc.           | Type |
|---------------|----------|--------|-----------------|-------------------|-----------------|-----------------|------|
| 1             |          | 14.789 | 255002.7        | 6612741.5         | 49.9554         | 49.9554         | + BB |
| 2             |          | 18.486 | 202217.9        | 6624537.4         | 50.0446         | 50.0446         | + BB |
| <b>Total:</b> |          |        | <b>457220.6</b> | <b>13237278.9</b> | <b>100.0000</b> | <b>100.0000</b> |      |

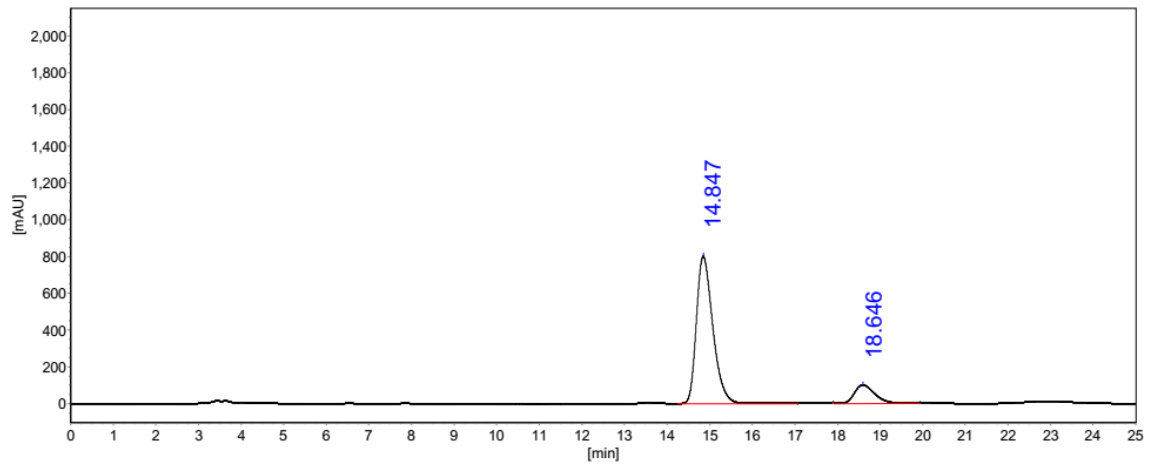

### Analysis Results

| No.           | Compound | R.Time | Height          | Area              | Area%           | Conc.           | Type |
|---------------|----------|--------|-----------------|-------------------|-----------------|-----------------|------|
| 1             |          | 14.847 | 801066.2        | 21432372.1        | 93.6985         | 93.6985         | + BB |
| 2             |          | 18.646 | 61378.1         | 1441393.2         | 6.3015          | 6.3015          | + BB |
| <b>Total:</b> |          |        | <b>862444.3</b> | <b>22873765.2</b> | <b>100.0000</b> | <b>100.0000</b> |      |



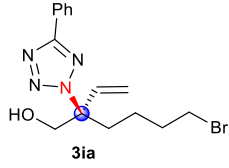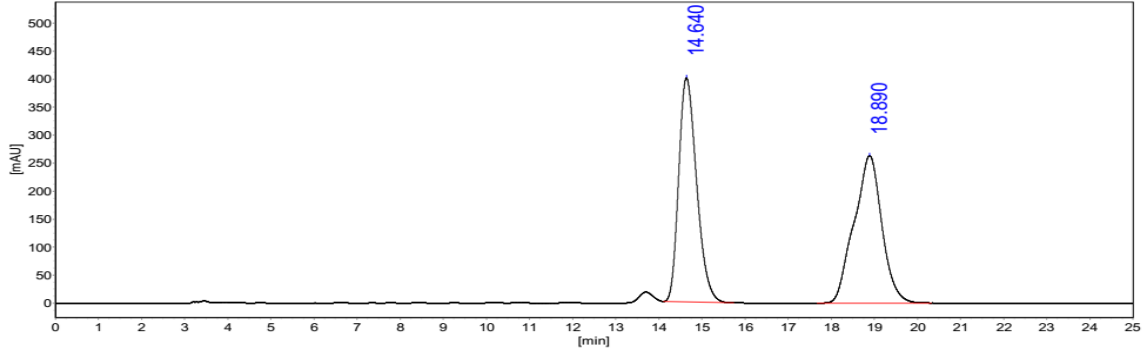

### Analysis Results

| No.           | Compound | R.Time | Height          | Area              | Area%           | Conc.           | Type |
|---------------|----------|--------|-----------------|-------------------|-----------------|-----------------|------|
| 1             |          | 14.640 | 400377.7        | 11558399.1        | 49.4578         | 49.4578         | + BB |
| 2             |          | 18.890 | 263496.9        | 11811809.0        | 50.5422         | 50.5422         | + BB |
| <b>Total:</b> |          |        | <b>663874.6</b> | <b>23370208.1</b> | <b>100.0000</b> | <b>100.0000</b> |      |

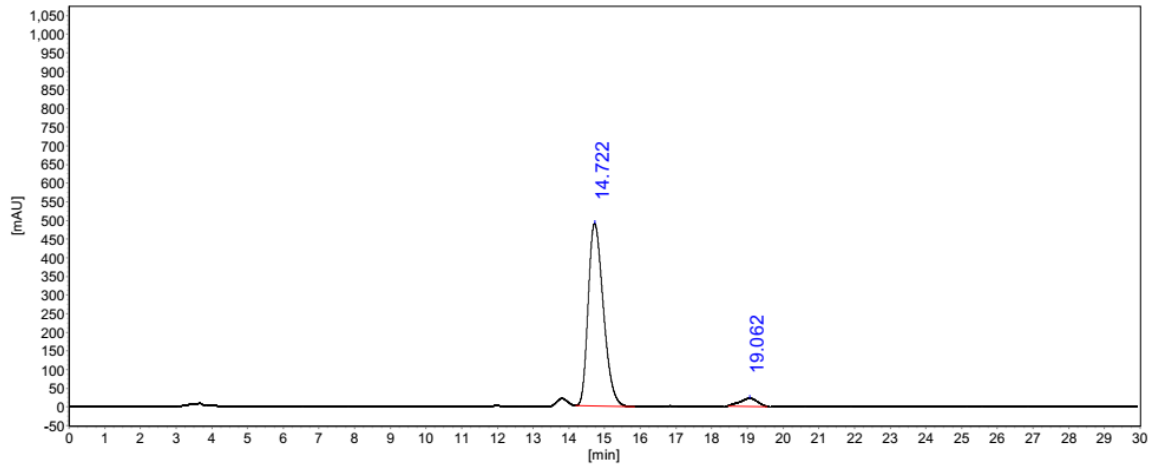

### Analysis Results

| No.           | Compound | R.Time | Height          | Area              | Area%           | Conc.           | Type |
|---------------|----------|--------|-----------------|-------------------|-----------------|-----------------|------|
| 1             |          | 14.722 | 490229.4        | 14479315.5        | 95.2335         | 95.2335         | + BB |
| 2             |          | 19.062 | 21414.9         | 724694.4          | 4.7665          | 4.7665          | + BB |
| <b>Total:</b> |          |        | <b>511644.3</b> | <b>15204009.9</b> | <b>100.0000</b> | <b>100.0000</b> |      |

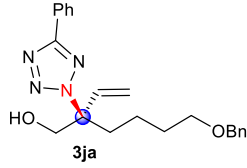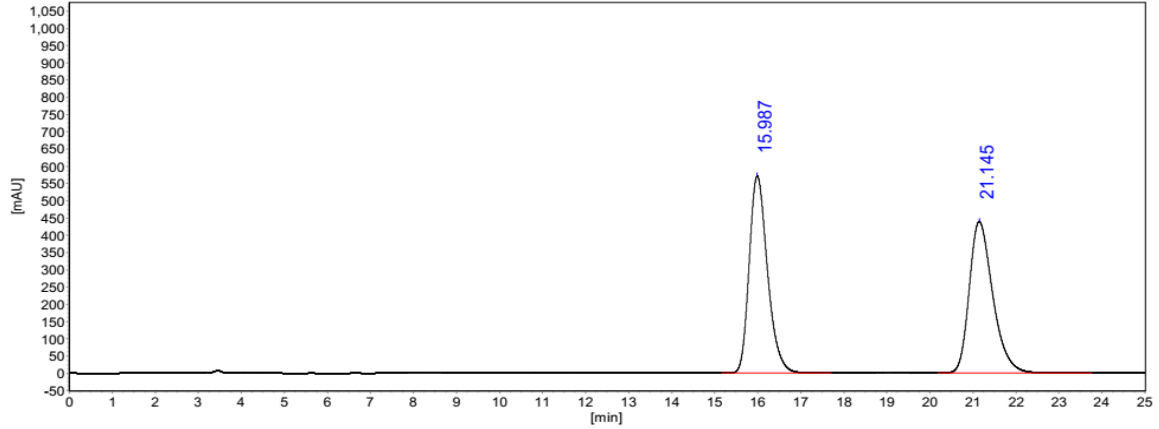

### Analysis Results

| No.           | Compound | R.Time | Height           | Area              | Area%           | Conc.           | Type |
|---------------|----------|--------|------------------|-------------------|-----------------|-----------------|------|
| 1             |          | 15.987 | 571949.5         | 16895201.3        | 50.3900         | 50.3900         | + BB |
| 2             |          | 21.145 | 439360.0         | 16633701.3        | 49.6100         | 49.6100         | + BB |
| <b>Total:</b> |          |        | <b>1011309.5</b> | <b>33528902.6</b> | <b>100.0000</b> | <b>100.0000</b> |      |

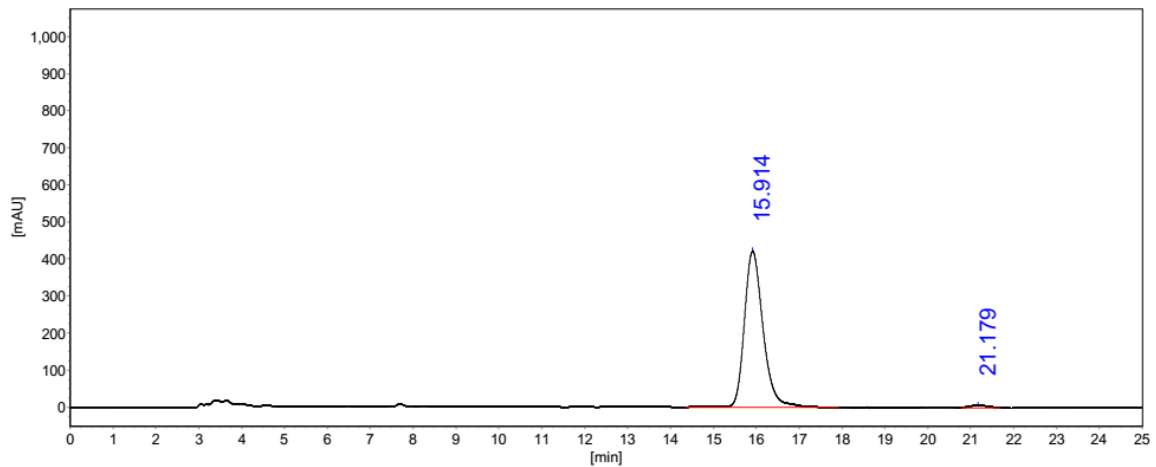

### Analysis Results

| No.           | Compound | R.Time | Height          | Area              | Area%           | Conc.           | Type |
|---------------|----------|--------|-----------------|-------------------|-----------------|-----------------|------|
| 1             |          | 15.914 | 421026.4        | 12677501.2        | 98.5038         | 98.5038         | + BB |
| 2             |          | 21.179 | 6380.8          | 192559.8          | 1.4962          | 1.4962          | + BB |
| <b>Total:</b> |          |        | <b>427407.2</b> | <b>12870061.0</b> | <b>100.0000</b> | <b>100.0000</b> |      |

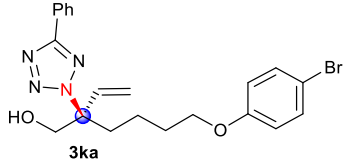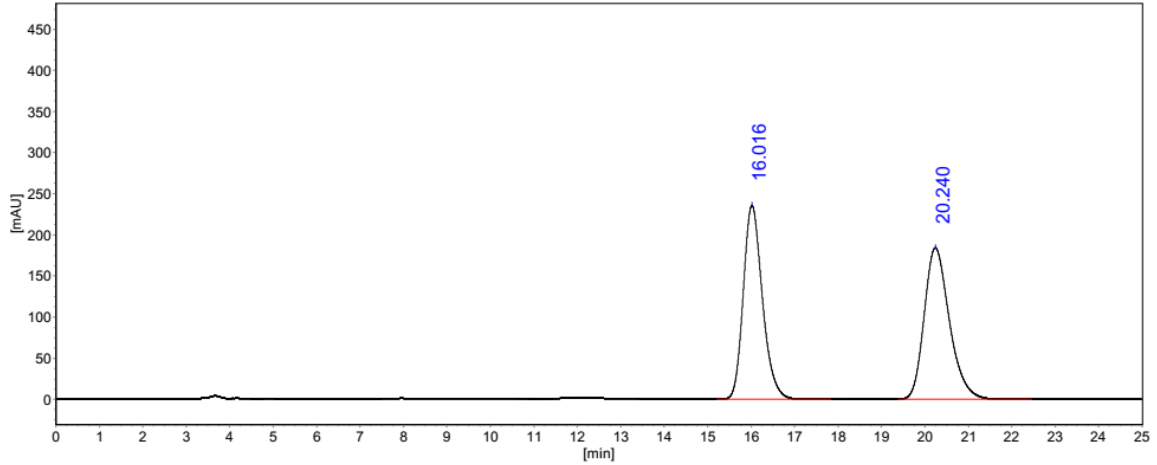

### Analysis Results

| No.           | Compound | R.Time | Height          | Area              | Area%           | Conc.           | Type |
|---------------|----------|--------|-----------------|-------------------|-----------------|-----------------|------|
| 1             |          | 16.016 | 235839.5        | 7205001.5         | 49.2171         | 49.2171         | + BB |
| 2             |          | 20.240 | 184273.5        | 7434208.2         | 50.7829         | 50.7829         | + BB |
| <b>Total:</b> |          |        | <b>420113.0</b> | <b>14639209.6</b> | <b>100.0000</b> | <b>100.0000</b> |      |

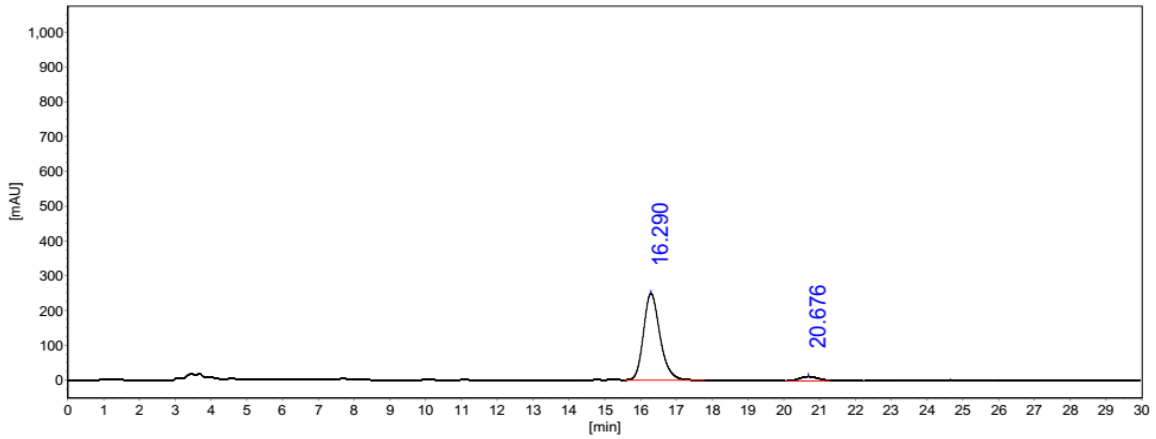

### Analysis Results

| No.           | Compound | R.Time | Height          | Area             | Area%           | Conc.           | Type |
|---------------|----------|--------|-----------------|------------------|-----------------|-----------------|------|
| 1             |          | 16.290 | 249032.9        | 7929810.7        | 94.9761         | 94.9761         | + BB |
| 2             |          | 20.676 | 12056.2         | 419457.1         | 5.0239          | 5.0239          | + BB |
| <b>Total:</b> |          |        | <b>261089.1</b> | <b>8349267.8</b> | <b>100.0000</b> | <b>100.0000</b> |      |

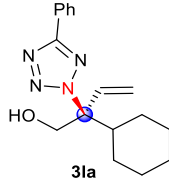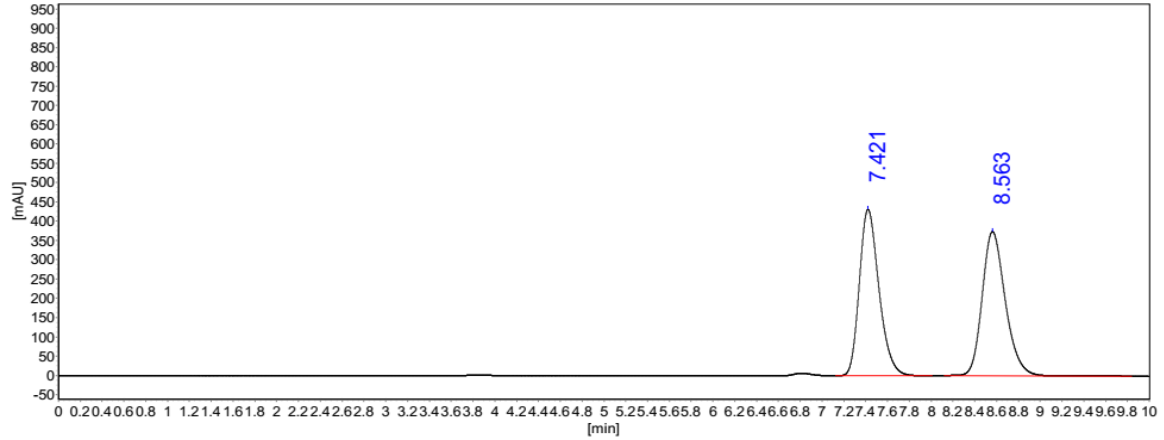

### Analysis Results

| No.           | Compound | R.Time | Height          | Area              | Area%           | Conc.           | Type |
|---------------|----------|--------|-----------------|-------------------|-----------------|-----------------|------|
| 1             |          | 7.421  | 431485.8        | 5410075.4         | 49.5250         | 49.5250         | + BB |
| 2             |          | 8.563  | 373916.0        | 5513846.0         | 50.4750         | 50.4750         | + BB |
| <b>Total:</b> |          |        | <b>805401.8</b> | <b>10923921.4</b> | <b>100.0000</b> | <b>100.0000</b> |      |

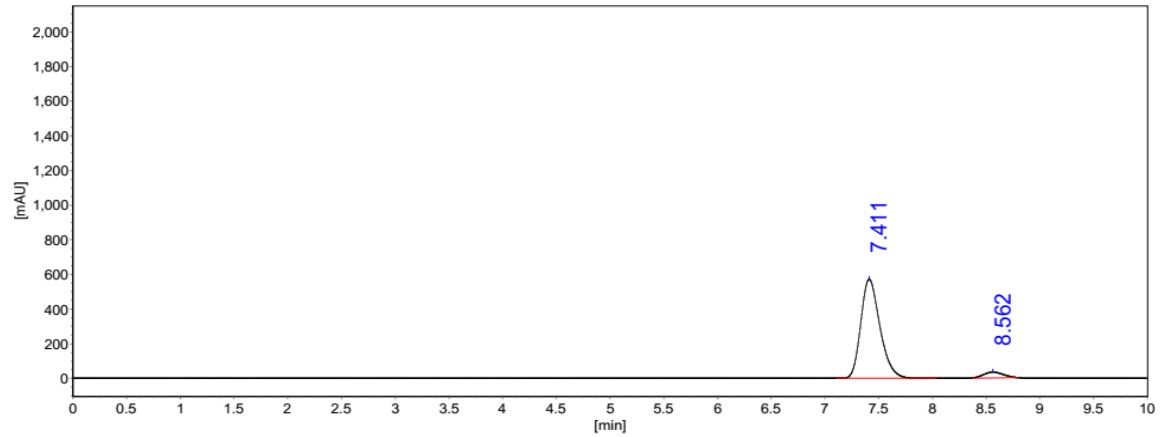

### Analysis Results

| No.           | Compound | R.Time | Height          | Area             | Area%           | Conc.           | Type |
|---------------|----------|--------|-----------------|------------------|-----------------|-----------------|------|
| 1             |          | 7.411  | 572413.3        | 7117180.2        | 94.4491         | 94.4491         | + BB |
| 2             |          | 8.562  | 33111.6         | 418290.1         | 5.5509          | 5.5509          | + BB |
| <b>Total:</b> |          |        | <b>605524.9</b> | <b>7535470.3</b> | <b>100.0000</b> | <b>100.0000</b> |      |
